# Supplementary material for: AKAP6 orchestrates the nuclear envelope microtubule-organizing center by linking golgi and nucleus via AKAP9
Source: eLife. 2020 Dec 9;9:e61669. doi: 10.7554/eLife.61669 (PMC7725499; doi:10.7554/eLife.61669)
Supplement: Figure 1—figure supplement 1—source data 1. [file elife-61669-fig1-figsupp1-data1.xlsx]

## Sheet: Figure 1-figure suplemment 2D
siControl		siAKAP6		siControl
AKAP6	Nesprin1	AKAP6	Nesprin1
1.1908	1.1689	0.45986	0.847457
0.796464	1.02991	0.22373	0.884414
0.889831	1.09403	0.253592	0.822407		Compare each cell mean with the other cell mean in that row
1.33675	1.20229	0.15185	0.876535
1.62953	1.40043	0.24334	1.01048		Number of families	1
0.986681	1.01274	0.264194	0.930238		Number of comparisons per family	2
0.83597	0.974508	0.274355	0.97465		Alpha	0.05
0.466578	0.582189	0.290082	1.06107
0.80946	1.01917	0.362972	0.874874		Bonferroni's multiple comparisons test	Mean Diff,	95,00% CI of diff,	Significant?	Summary	Adjusted P Value
0.445686	0.659	0.191356	0.932358
1.15043	1.08944	0.240829	0.799018		siControl - siAKAP6
1.35961	1.20056	0.205077	0.673698		AKAP6	0.835	0,7598 to 0,9103	Yes	****	<0,0001
1.29969	1.05503	0.149442	0.611903		Nesprin1	-0.04462	-0,1185 to 0,02925	No	ns	0.3493
1.4178	1.16604	0.14983	0.742205
1.21437	1.22942	0.163409	0.771742
1.26168	1.34047	0.156044	0.774639		Test details	Mean 1	Mean 2	Mean Diff,	SE of diff,	N1	N2	t	DF
1.04933	1.03892	0.350558	0.790079
1.29672	1.24635	0.152549	0.982776		siControl - siAKAP6
0.761605	0.705531	0.302328	0.772025		AKAP6	1	0.165	0.835	0.03343	70	83	24.98	313
0.889417	1.0822	0.170606	0.901691		Nesprin1	1	1.045	-0.04462	0.0328	66	98	1.36	313
0.933065	0.89208	0.189298	0.908686
1.47723	1.1713	0.197038	0.82912
0.849898	0.894342	0.180806	0.893494
1.20183	1.25355	0.25222	0.680799
0.591542	0.71288	0.255288	0.667161
0.499547	0.727048	0.174049	0.975745
0.748803	0.708888	0.165273	1.02729
1.13152	0.947586	0.269216	1.0033
0.717672	0.706626	0.240505	0.60254
0.760492	0.688572	0.171422	0.610702
1.34354	1.0199	0.167241	0.682212
1.33569	1.0785	0.132356	0.675005
1.32738	1.02218	0.13088	0.951684
1.31743	1.36865	0.296308	0.95073
1.25781	1.26717	0.26264	0.699666
1.23674	1.12233	0.135152	0.838907
1.2281	1.14841	0.17115	1.02959
1.19679	1.08112	0.301033	0.857032
1.1921	0.78019	0.192145	0.563605
1.18541	0.843296	0.150814	0.807674
1.17061	1.24582	0.227729	0.713021
1.14318	1.16463	0.198838	1.32492
1.13943	1.04188	0.313731	1.44458
1.07855	0.758517	0.169814	1.08925
1.05756	0.846478	0.168258	1.14936
1.0325	1.04663	0.168236	1.08224
1.02432	1.08802	0.16806	1.26794
1.01623	0.845975	0.163346	1.35376
1.01608	1.21379	0.161899	0.844887
0.982621	0.941751	0.159071	1.48479
0.964007	1.10315	0.158128	1.25891
0.952189	0.686811	0.157229	1.15991
0.939121	0.833305	0.147516	1.50938
0.938069	0.866903	0.147231	1.28701
0.936139	0.857053	0.140061	1.23887
0.932872	0.893732	0.140017	1.36617
0.9193	0.795257	0.138395	1.29198
0.860079	1.24763	0.131686	1.29088
0.857097	0.954743	0.130019	1.18789
0.822652	0.961894	0.129164	1.1324
0.81967	0.963001	0.12741	1.32566
0.806054	1.05914	0.122499	1.05904
0.804607	0.875544	0.109563	1.26002
0.793315	0.985098	0.103007	1.23786
0.778414	0.995692	0.095245	1.16668
0.74521	0.995813	0.093184	1.3362
0.740014		0.09018	1.38724
0.722144		0.087505	1.39523
0.703222		0.07685	1.52578
0.683731		0.072157	1.44654
		0.069088	1.25267
		0.064264	1.07753
		0.062554	1.21625
		0.058936	1.2315
		0.050166	1.17192
		0.048894	0.958107
		0.048829	1.32014
		0.048061	1.60375
		0.045627	1.44509
		0.040321	0.761176
		0.032406	1.15784
		0.027846	0.841725
		0.0082	1.23114
			1.18076
			1.14452
			1.18835
			0.94155
			1.31211
			0.987978
			1.18287
			0.917339
			1.16275
			0.827061
			1.15524
			0.844887
			1.18855
			1.0874
			1.07513

## Sheet: Figure 1-figure supplement 2F
siControl	siAKAP6	siAKAP6+AKAP6
0.8175	0.0948	0.9883
0.8714	0.058	0.8057
1.0488	0.0385	0.8272		Number of families	1
1.5078	0.0727	0.7087		Number of comparisons per family	3
1.1296	0.105	1.5796		Alpha	0.05
1.0671	0.0943	0.7654
1.2834	0.1021	0.9743		Bonferroni's multiple comparisons test	Mean Diff,	95,00% CI of diff,	Significant?	Summary	Adjusted P Value
1.3422	0.0534	1.5272		siControl vs. siAKAP6	0.8027	0,7218 to 0,8837	Yes	****	<0,0001	A-B
1.008	0.0395	0.8527		siControl vs. siAKAP6+AKAP6	0.07766	-0,003297 to 0,1586	No	ns	0.0648	A-C
1.1643	0.0618	1.9452		siAKAP6 vs. siAKAP6+AKAP6	-0.7251	-0,8060 to -0,6441	Yes	****	<0,0001	B-C
0.7158	0.0955	1.0861
0.9385	0.0483	0.7286		Test details	Mean 1	Mean 2	Mean Diff,	SE of diff,	n1	n2	t	DF
1.1189	0.0512	0.9855		siControl vs. siAKAP6	0.9996	0.1969	0.8027	0.03363	100	100	23.87	297
0.8506	0.0895	1.6503		siControl vs. siAKAP6+AKAP6	0.9996	0.922	0.07766	0.03363	100	100	2.31	297
1.035	0.0512	0.9907		siAKAP6 vs. siAKAP6+AKAP6	0.1969	0.922	-0.7251	0.03363	100	100	21.56	297
0.4867	0.0789	0.6468
1.0964	0.0667	0.9281
1.0306	0.0916	1.0856
0.7561	0.0668	0.9155
0.8024	0.1127	0.9183
1.3214	0.0503	1.0204
0.4609	0.1165	1.0968
0.4554	0.1225	1.3275
1.1378	0.043	1.1781
0.7405	0.0569	0.8403
1.055	0.0937	0.8061
1.4779	0.1083	0.7495
1.04	0.044	0.9875
1.1232	0.1106	0.9789
1.0624	0.0827	1.0026
0.6273	0.0441	0.9174
1.1797	0.0367	0.7201
1.2653	0.0472	0.7339
0.7407	0.0862	1.0016
0.8818	0.0485	0.7099
0.7554	0.0772	1.5352
1.1221	0.0615	0.7136
0.8032	0.0527	0.9285
1.6237	0.0551	0.9586
1.0576	0.0409	0.6281
0.846703	0.239629	0.990174
0.892004	0.308113	0.83676
1.04097	0.387578	0.854868
1.42658	0.547326	0.591835
1.10884	0.440226	0.75527
1.05633	0.20871	1.48685
1.23802	0.173884	0.463396
1.28749	0.308411	0.802947
1.00674	0.192342	0.434307
1.13798	0.430737	0.978414
0.761254	0.308372	1.44287
0.948326	0.316109	0.876285
1.09986	0.221028	0.596755
0.874468	0.345171	1.794
1.02936	0.336332	1.07231
0.568847	0.44621	0.772015
1.08096	0.414149	0.987838
1.02566	0.319808	0.651363
0.795106	0.306373	0.6027
0.833995	0.560748	1.54621
1.26994	0.170314	0.992186
0.547183	0.263551	0.703297
0.542523	0.409164	0.939616
1.11573	0.338409	1.07194
0.782009	0.316225	0.928998
1.04621	0.418198	0.541615
1.40144	0.248196	0.93136
1.03357	0.297313	1.01712
1.10349	0.239175	1.08133
1.0524	0.336981	1.27509
0.686942	0.347067	1.14959
1.15094	0.245743	0.865823
1.22288	0.402973	0.837111
0.782204	0.204881	0.789551
0.900701	0.193159	0.646443
0.794496	0.211942	0.989499
1.10257	0.151882	0.982243
0.834709	0.240213	1.00218
1.52392	0.423403	0.930646
1.04839	0.401675	0.764849
0.8833	0.353596	0.610787
0.8811	0.31581	0.776467
0.8214	0.298365	1.00134
1.0401	0.320652	0.756334
0.9834	0.343938	1.44956
0.4738	0.359359	0.674234
1.248	0.413292	0.75945
1.2301	0.1517	0.939901
0.7122	0.1911	0.965226
1.2544	0.1793	0.6241
1.186	0.2238	0.4549
1.3617	0.0825	1.0485
1.4034	0.2104	0.5953
1.2662	0.177	0.6794
1.2833	0.1494	0.7454
0.8849	0.1136	0.714
0.4915	0.0772	0.4944
0.4951	0.0518	0.5804
0.9594	0.0636	0.6698
1.0995	0.0894	0.935

## Sheet: Figure 1-figure supplement 2H
siControl	siAKAP6	siAKAP6+AKAP6
0.9695	0.2807	0.5792
0.9743	0.3498	1.0648		Number of families	1
0.8113	0.4322	0.7997		Number of comparisons per family	3
1.6459	0.655	0.8313		Alpha	0.05
1.2478	0.3675	1.1394
1.2725	0.4049	1.9019		Bonferroni's multiple comparisons test	Mean Diff,	95,00% CI of diff,	Significant?	Summary	Adjusted P Value
1.1287	0.6727	0.9553		siControl vs. siAKAP6	0.6117	0,5147 to 0,7087	Yes	****	<0,0001	A-B
1.6248	0.3396	0.5014		siControl vs. siAKAP6+AKAP6	0.09555	-0,005835 to 0,1969	No	ns	0.072	A-C
1.1277	0.2506	0.5417		siAKAP6 vs. siAKAP6+AKAP6	-0.5161	-0,6166 to -0,4156	Yes	****	<0,0001	B-C
0.7813	0.33	1.156
0.7131	0.1866	0.279		Test details	Mean 1	Mean 2	Mean Diff,	SE of diff,	n1	n2	t	DF
1.2072	0.3239	0.5545		siControl vs. siAKAP6	0.9718	0.3601	0.6117	0.04034	128	133	15.16	370
1.599	0.5313	1.0454		siControl vs. siAKAP6+AKAP6	0.9718	0.8763	0.09555	0.04216	128	112	2.267	370
0.5428	0.6291	0.5406		siAKAP6 vs. siAKAP6+AKAP6	0.3601	0.8763	-0.5161	0.04178	133	112	12.35	370
0.4253	0.1612	0.7905
0.9111	0.6187	0.5473
0.7267	0.6245	0.3862
0.5595	0.163	1.096
1.3413	0.6083	0.7285
1.2332	0.4665	0.2866
0.7764	0.1906	0.4254
1.5009	0.5104	0.7863
0.8634	0.3136	0.4916
0.6664	0.3462	0.9292
0.7015	0.3631	0.3355
0.1949	0.4629	1.255
0.2009	0.6685	0.9276
1.6599	0.36	0.4957
0.5357	0.3476	0.8336
1.0867	0.5651	0.7748
1.0553	0.4891	0.7942
1.0429	0.367	0.9324
1.0844	0.3033	1.2608
0.5888	0.4371	1.2592
0.6309	0.6711	1.182
0.9292	0.5422	0.8748
0.3738	0.387	0.8544
0.8516	0.4967	0.63
0.6541	0.3553	1.594
0.3307	0.4594	0.8099
1.1065	0.4664	1.0415
0.5556	0.3794	0.5284
1.035	0.5221	2.0436
1.2304	0.5605	0.9752
0.7775	0.3521	1.4126
0.3751	0.6151	0.4028
0.6617	0.5797	1.5271
0.572	0.6338	0.8306
1.3928	0.6143	0.7552
0.7699	0.5488	1.0888
1.4888	0.5589	1.9114
0.7649	0.2257	1.4092
0.1549	0.426	1.2581
1.0921	0.5299	0.4104
0.5724	0.199	1.1204
0.7269	0.4008	1.3784
0.9956	0.5383	0.881
1.0376	0.5686	0.5711
1.365	0.3008	1.2975
1.1867	0.1567	0.5137
1.2229	0.2391	0.2265
1.1168	0.2562	0.7707
0.2246	0.2788	1.0607
1.1766	0.3461	0.9692
0.8453	0.168	1.4126
1.0658	0.1271	0.4438
0.615	0.2339	0.5551
0.772	0.1494	0.4072
0.9658	0.1706	0.4281
1.0503	0.2975	1.4766
1.3298	0.1358	0.7832
0.7589	0.1684	0.8043
1.4922	0.1572	0.6134
1.3692	0.2329	0.9869
0.8068	0.2542	0.899
0.4944	0.1837	0.3425
1.0264	0.31	0.6502
1.0517	0.1925	0.833
1.0718	0.2533	0.5521
1.0796	0.41	0.4424
1.1214	0.31	0.9868
1.1689	0.1474	0.7627
1.2284	0.4973	0.7081
1.2478	0.3284	0.506
1.2942	0.2249	0.6223
1.3228	0.4274	1.7397
1.4429	0.1496	0.8993
1.5912	0.1595	0.2407
0.6021	0.1611	0.9058
0.6073	0.1758	0.4603
0.6136	0.2051	0.4823
1.6104	0.2427	0.5254
1.0381	0.274	0.5028
1.2421	0.3175	0.6763
0.9774	0.3474	0.5608
0.5882	0.422	0.4298
0.8155	0.4434	1.1939
0.6822	0.4683	0.422
0.9135	0.5636	0.6334
0.889	0.6424	0.2614
0.7165	0.3303	1.4088
0.742	0.1469	0.75
1.4827	0.0345	0.5832
0.8199	0.06	0.588
1.1332	0.5559	1.9512
1.1753	0.2825	1.5052
1.379	0.2486	1.561
1.031	0.0138	1.7608
0.9507	0.2983	2.1182
1.0717	0.3863	1.185
0.6703	0.3944	0.7105
0.4021	0.2111	1.3144
1.2559	0.4017
1.2088	0.5208
1.3881	0.6529
1.0271	0.5414
1.756	0.2871
1.274	0.1632
0.9253	0.2025
1.1238	0.1662
0.8713	0.0673
0.9213	0.4506
1.0788	0.2446
1.0605	0.5153
1.3035	0.4998
0.8776	0.7846
0.9154	0.0649
0.865	0.5242
	0.3662
	0.334
	0.1827
	0.4861
	0.1984
