# Supplementary material for: AKAP6 orchestrates the nuclear envelope microtubule-organizing center by linking golgi and nucleus via AKAP9
Source: eLife. 2020 Dec 9;9:e61669. doi: 10.7554/eLife.61669 (PMC7725499; doi:10.7554/eLife.61669)
Supplement: Figure 1—source data 1. [file elife-61669-fig1-data1.xlsx]

## Sheet: Figure 1C
Compare each cell mean with the other cell mean in that row
Number of families	1
Number of comparisons per family	4
Alpha	0.05
Bonferroni's multiple comparisons test	Predicted (LS) mean diff,	95,00% CI of diff,	Significant?	Summary	Adjusted P Value
siControl - siAKAP6
CDK5Rap2	0.3907	0,2638 to 0,5176	Yes	****	<0,0001
PCM1	0.5653	0,3587 to 0,7719	Yes	****	<0,0001
Pcnt	0.6375	0,5003 to 0,7747	Yes	****	<0,0001
AKAP9	0.4859	0,3476 to 0,6242	Yes	****	<0,0001
Test details	Predicted (LS) mean 1	Predicted (LS) mean 2	Predicted (LS) mean diff,	SE of diff,	N1	N2	t	DF
siControl - siAKAP6
CDK5Rap2	1.016	0.6255	0.3907	0.05055	60	60	7.728	365
PCM1	0.9417	0.3764	0.5653	0.0823	19	28	6.869	365
Pcnt	0.9164	0.2789	0.6375	0.05467	58	46	11.66	365
AKAP9	0.9021	0.4162	0.4859	0.0551	56	46	8.818	365

## Sheet: Raw_Figure 1C
	CDK5Rap2		PCM1		Pcnt		AKAP9
	siControl	siAKAP6	siControl	siAKAP6	siControl	siAKAP6	siControl	siAKAP6
	1.23	0.91	1.26913	0.430885	0.778089	0.419117	0.977521	0.59258
	0.65	0.61	0.859245	0.483686	0.995565	0.33702	1.15489	0.384772
	0.77	0.54	0.948342	0.379019	0.701091	0.258904	0.913631	0.244529
	0.87	0.55	1.23072	0.439224	0.761448	0.360422	1.57488	0.383744
	0.67	0.57	0.704544	0.319194	1.18383	0.293339	1.05948	0.200597
	1.16	0.48	0.940038	0.393447	1.24283	0.253868	0.990432	0.279042
	1.45	0.58	0.593268	0.407807	0.81461	0.230364	1.23754	0.222129
	0.86	0.51	0.585136	0.432235	1.72892	0.245808	2.10637	0.231195
	1.34	0.6	0.866373	0.302689	1.63029	0.343622	1.09442	0.298674
	0.57	0.8	1.54874	0.393101	1.12329	0.231042	1.33703	0.212578
	0.99	0.44	0.685133	0.443376	1.05915	0.345508	0.524611	0.391033
	1.06	0.65	1.10367	0.324384	0.713669	0.266466	0.710477	0.278136
	0.85	0.88	0.795718	0.436837	0.94188	0.168429	0.848956	0.063534
	0.76	0.69	0.839384	0.396838	1.30766	0.409135	0.632758	0.545493
	0.98	0.87	1.27902	0.415142	1.06793	0.222964	0.617901	0.029274
	0.65	0.64	0.914952	0.455729	0.860626	0.202931	0.664395	0.133891
	1.24	0.63	0.545588	0.337567	1.62443	0.33155	0.087888	0.304598
	0.75	0.72	1.19134	0.359642	0.323188	0.178965	0.706912	0.235837
	0.79	0.65	0.99187	0.355663	0.747618	0.232676	1.32133	0.483187
	0.81	0.64		0.332965	1.00967	0.233016	1.43858	0.466698
	1.82	0.77		0.366701	1.14671	0.434116	1.39417	1.0371
	1.14	0.56		0.385005	0.237512	0.374482	1.09081	0.590307
	0.79	0.5		0.316495	1.54232	0.291112	0.957312	0.112833
	0.7	0.9		0.398291	1.40731	0.230652	0.720676	0.141157
	0.68	0.83		0.274282	1.25449	0.137117	0.817637	0
	0.71	0.61		0.287672	1.47452	0.171269	1.20118	0.124087
	0.97	0.47		0.408637	0.796027	0.239099	0.89777	0.191072
	1.28	0.47		0.262033	1.70158	0.31466	1.05027	0.238399
	1	0.62			1.15874	0.148789	1.37775	0
	0.92	0.53			0.993525	0.20875	1.0022	0.140033
	0.92	0.54			0.797527	0.523122	1.2932	0.354163
	1.8	0.69			0.96274	0.138707	1.09046	0
	1.11	0.61			1.21056	0.441057	0.952899	0.544539
	0.81	0.6			0.823892	0.206877	0.869412	0.095799
	1.25	0.62			0.821366	0.242323	0.786101	0.105409
	0.99	0.49			1.49871	0.33082	1.06363	0.718734
	0.77	0.47			0.726169	0.683741	0.790043	0.858821
	1.55	0.63			0.824444	0.36859	0.916245	0.718969
	1.29	0.59			0.96645	0.306863	0.895005	0.808988
	0.77	0.67			1.17283	0.513122	0.833228	0.831639
	0.94	0.57			0.832022	0.338674	1.2196	0.819519
	0.82	0.68			0.972567	0.344831	1.1407	0.556054
	0.9	0.64			0.782727	0.220112	0.86447	0.533461
	0.8	0.58			1.11512	0.451236	0.986141	0.734973
	0.89	0.51			1.44322	0.209851	0.659546	0.691493
	0.88	0.48			0.6942	0.326123	1.01891	0.554465
	1.16	0.76			0.570271	0.205036	0.738915	0.643601
	1.17	0.7			1.01855	0.095157	0.815989	0.495336
	1.87	0.53			0.591229	0.164542	0.763979	0.59312
	1.12	0.55			0.443579	0.225085		0.494747
	1.4	0.51			0.403322	0.159213		0.653897
	1.1	0.7				0.178987		0.517046
	1.04	0.66				0.19355		0.570586
	0.91	0.77
	0.98	0.94
	1.03	0.63
	1.41	0.5
	0.98	0.54
	0.96	0.63
	0.89	0.52
