# Supplementary material for: AKAP6 orchestrates the nuclear envelope microtubule-organizing center by linking golgi and nucleus via AKAP9
Source: eLife. 2020 Dec 9;9:e61669. doi: 10.7554/eLife.61669 (PMC7725499; doi:10.7554/eLife.61669)
Supplement: Figure 2—source data 1. [file elife-61669-fig2-data1.xlsx]

## Sheet: Figure 2G
	Pcnt		AKAP9			Compare cell means regardless of rows and columns
	GFP-SR1-3	GFP-SR1	GFP-SR1-3	GFP-SR1
#1	1	0.333333	0.9	0.43		Number of families	1
#2	1	0	0.83	0.29		Number of comparisons per family	6
#3	0.5	0.5	0.73	0.2		Alpha	0.05
#4	0.833333	0.333333	0.833333	0.33
#5	0.666667	0.2	0.86	0.1		Bonferroni's multiple comparisons test	Mean Diff,	95,00% CI of diff,	Significant?	Summary	Adjusted P Value
#6	1	0	0.79	0.2
#7	1	0.5	0.75	0.45		GFP-SR1-3:Pcnt vs. GFP-SR1-3:AKAP9	0.06233	-0,1239 to 0,2486	No	ns	>0,9999
#8	1	0.25	0.78	0.18		GFP-SR1-3:Pcnt vs. GFP-SR1:Pcnt	0.635	0,4487 to 0,8213	Yes	****	<0,0001
#9	1	0.2	0.86	0.33		GFP-SR1-3:Pcnt vs. GFP-SR1:AKAP9	0.5947	0,4084 to 0,7809	Yes	****	<0,0001
#10	0.666667	0	0.71	0.21		GFP-SR1-3:AKAP9 vs. GFP-SR1:Pcnt	0.5727	0,3864 to 0,7589	Yes	****	<0,0001
Mean	0.866667	0.231667	0.804333	0.272		GFP-SR1-3:AKAP9 vs. GFP-SR1:AKAP9	0.5323	0,3461 to 0,7186	Yes	****	<0,0001
Std. Deviation	0.189215	0.190912	0.0623817	0.11351		GFP-SR1:Pcnt vs. GFP-SR1:AKAP9	-0.04033	-0,2266 to 0,1459	No	ns	>0,9999
						Test details	Mean 1	Mean 2	Mean Diff,	SE of diff,	N1	N2	t	DF
						GFP-SR1-3:Pcnt vs. GFP-SR1-3:AKAP9	0.8667	0.8043	0.06233	0.06672	10	10	0.9343	36
						GFP-SR1-3:Pcnt vs. GFP-SR1:Pcnt	0.8667	0.2317	0.635	0.06672	10	10	9.518	36
						GFP-SR1-3:Pcnt vs. GFP-SR1:AKAP9	0.8667	0.272	0.5947	0.06672	10	10	8.913	36
						GFP-SR1-3:AKAP9 vs. GFP-SR1:Pcnt	0.8043	0.2317	0.5727	0.06672	10	10	8.583	36
						GFP-SR1-3:AKAP9 vs. GFP-SR1:AKAP9	0.8043	0.272	0.5323	0.06672	10	10	7.979	36
						GFP-SR1:Pcnt vs. GFP-SR1:AKAP9	0.2317	0.272	-0.04033	0.06672	10	10	0.6045	36
