# Supplementary material for: AKAP6 orchestrates the nuclear envelope microtubule-organizing center by linking golgi and nucleus via AKAP9
Source: eLife. 2020 Dec 9;9:e61669. doi: 10.7554/eLife.61669 (PMC7725499; doi:10.7554/eLife.61669)
Supplement: Figure 3—source data 1. [file elife-61669-fig3-data1.xlsx]

## Sheet: Figure 3B
Compare each cell mean with the other cell mean in that row
Number of families	1
Number of comparisons per family	21
Alpha	0.05
Bonferroni's multiple comparisons test	Predicted (LS) mean diff,	95,00% CI of diff,	Significant?	Summary	Adjusted P Value
siControl - siAKAP6
-2	0.3545	-0,2132 to 0,9223	No	ns	>0,9999
-1,8	0.376	-0,1918 to 0,9438	No	ns	0.923
-1,6	0.461	-0,1068 to 1,029	No	ns	0.2847
-1,4	0.6305	0,06268 to 1,198	Yes	*	0.0157
-1,2	0.8388	0,2710 to 1,407	Yes	***	0.0002
-1	1.269	0,7016 to 1,837	Yes	****	<0,0001
-0,8	1.82	1,252 to 2,387	Yes	****	<0,0001
-0,6	3.313	2,746 to 3,881	Yes	****	<0,0001
-0,4	4.872	4,304 to 5,439	Yes	****	<0,0001
-0,2	5.396	4,828 to 5,964	Yes	****	<0,0001
0	2.111	1,543 to 2,679	Yes	****	<0,0001
0,2	-0.3191	-0,8869 to 0,2487	No	ns	>0,9999
0,4	-0.7708	-1,339 to -0,2030	Yes	***	0.0008
0,6	-0.8216	-1,389 to -0,2538	Yes	***	0.0002
0,8	-0.6836	-1,251 to -0,1159	Yes	**	0.0054
1	-0.5958	-1,164 to -0,02804	Yes	*	0.0302
1,2	-0.5428	-1,111 to 0,02499	No	ns	0.0771
1,4	-0.5331	-1,101 to 0,03471	No	ns	0.0909
1,6	-0.4508	-1,019 to 0,1170	No	ns	0.3312
1,8	-0.3189	-0,8867 to 0,2489	No	ns	>0,9999
2	-0.3041	-0,8719 to 0,2637	No	ns	>0,9999
Test details	Predicted (LS) mean 1	Predicted (LS) mean 2	Predicted (LS) mean diff,	SE of diff,	N1	N2	t	DF
siControl - siAKAP6
-2	1.16	0.8058	0.3545	0.1864	24	24	1.902	966
-1,8	1.189	0.8131	0.376	0.1864	24	24	2.017	966
-1,6	1.291	0.8304	0.461	0.1864	24	24	2.473	966
-1,4	1.47	0.8392	0.6305	0.1864	24	24	3.382	966
-1,2	1.672	0.8329	0.8388	0.1864	24	24	4.5	966
-1	2.112	0.8424	1.269	0.1864	24	24	6.81	966
-0,8	2.731	0.9116	1.82	0.1864	24	24	9.762	966
-0,6	4.5	1.187	3.313	0.1864	24	24	17.78	966
-0,4	6.531	1.66	4.872	0.1864	24	24	26.14	966
-0,2	7.774	2.378	5.396	0.1864	24	24	28.95	966
0	4.996	2.885	2.111	0.1864	24	24	11.33	966
0,2	2.22	2.539	-0.3191	0.1864	24	24	1.712	966
0,4	1.617	2.388	-0.7708	0.1864	24	24	4.135	966
0,6	1.405	2.226	-0.8216	0.1864	24	24	4.408	966
0,8	1.254	1.937	-0.6836	0.1864	24	24	3.668	966
1	1.209	1.805	-0.5958	0.1864	24	24	3.197	966
1,2	1.157	1.7	-0.5428	0.1864	24	24	2.912	966
1,4	1.102	1.635	-0.5331	0.1864	24	24	2.86	966
1,6	1.071	1.522	-0.4508	0.1864	24	24	2.418	966
1,8	1.051	1.37	-0.3189	0.1864	24	24	1.711	966
2	1.003	1.307	-0.3041	0.1864	24	24	1.632	966

## Sheet: Raw_Figure 3B 
	-2	-1.8	-1.6	-1.4	-1.2	-1	-0.8	-0.6	-0.4	-0.2	0	0.2	0.4	0.6	0.8	1	1.2	1.4	1.6	1.8	2
siControl	1.48755	1.71063	1.9069	2.2008	2.21793	2.57121	2.90983	4.64056	6.48358	7.33463	5.13155	2.71407	1.87879	1.44989	1.01673	0.875899	0.895162	0.947651	0.902921	0.878707	0.860084
	0.893593	0.869086	0.864424	0.865796	0.960029	1.36003	1.84596	3.21217	5.3798	8.13104	4.77775	1.59903	1.157	1.1203	1.06049	1.04506	0.989786	1.09562	1.33804	1.63892	1.58544
	0.769367	0.776765	0.871757	0.935842	1.10548	1.51867	1.90096	3.31504	6.19559	7.22097	5.27124	2.41511	1.41108	0.998619	0.845439	0.856374	0.911438	0.885918	0.89388	0.890261	0.875017
	1.269	1.19701	1.19339	1.22254	1.40372	1.62997	1.99878	3.37554	5.99861	9.70924	6.698	2.2453	1.30785	1.04128	1.00411	1.0228	1.12458	0.98728	0.78816	0.67975	0.715227
	1.49915	1.39532	1.20055	1.30759	1.67231	2.4375	3.67095	6.14638	7.13688	6.34345	5.05506	2.27196	1.30923	1.00198	0.860447	0.852255	0.786	0.768555	0.792001	0.864862	0.903396
	1.41738	1.56715	1.72283	1.8653	1.78058	1.9552	2.45057	4.41207	7.46946	8.77216	4.65257	2.12615	1.73982	1.63264	1.32658	1.34763	1.29631	1.23372	1.27635	1.35317	1.19624
	1.20819	1.36429	1.50935	1.63868	1.88769	2.47216	3.10308	5.18355	6.99606	8.02513	4.92447	2.00454	1.78475	1.59067	1.2654	1.21452	1.15724	1.06694	1.09723	1.28392	1.30222
	0.808505	0.845044	1.04825	1.43697	2.21095	4.16112	5.77358	6.82062	7.36023	7.06586	3.74138	1.84048	1.35369	1.0965	0.992168	0.979159	1.01814	0.945609	0.784664	0.721357	0.69267
	0.681069	0.641282	0.630225	0.617999	0.637743	0.789438	1.24167	3.37659	6.34519	7.8659	4.57927	2.10996	1.90809	2.01517	1.90454	1.83945	1.66333	1.44331	1.40596	1.15208	1.03919
	1.60782	1.49742	1.15782	1.08856	1.1135	1.48277	2.01306	3.01873	4.59723	8.10706	6.60965	2.0428	1.48004	1.28901	1.24814	1.16622	1.07275	0.966599	0.880369	0.856709	0.850117
	0.915176	0.783837	0.724381	0.706942	0.753984	0.885736	1.10129	1.91308	3.84347	7.6634	6.92362	2.38416	1.19173	0.905483	0.77888	0.76904	0.775347	0.774188	0.805286	0.818425	0.805556
	0.723224	0.680897	0.67723	0.687102	0.698303	0.785389	1.02612	2.74044	6.6588	8.79187	5.03716	1.66822	1.11429	0.988482	1.12576	1.33925	1.62982	1.62624	1.35487	1.10894	1.00072
	1.55078	1.27151	1.05971	1.18401	1.49296	1.93148	2.6407	5.53634	8.46104	9.36007	4.73187	1.72815	1.19489	1.05412	1.03943	1.02505	1.0625	1.04371	0.872212	0.816298	0.762489
	0.711506	0.773704	0.87764	1.03341	1.25787	1.6625	1.90136	2.98387	5.68731	8.04963	5.4375	2.22842	1.70037	1.64949	1.41074	1.20059	1.0236	1.02124	1.23049	1.17622	1.05016
	0.734499	0.746015	0.820956	0.899039	1.05857	1.39347	2.1808	5.5173	9.30521	10.0533	4.64419	1.94649	1.55476	1.62495	1.79787	1.57885	1.2954	1.1403	1.06095	1.07325	1.10528
	1.40377	1.48795	2.01702	2.35948	2.58692	3.22149	3.97005	6.1178	8.08966	8.03189	3.48871	1.5265	1.41808	1.38553	1.16145	1.10271	1.14556	1.08645	1.11255	0.996576	0.814407
	1.62388	1.63582	1.79997	2.31854	2.61514	2.90546	3.688	5.1094	6.79637	8.17059	4.34324	2.37438	2.0642	1.95261	1.93754	1.9194	1.66857	1.59709	1.59185	1.50539	1.39226
	0.831292	0.908551	1.02112	1.06004	1.01014	0.981315	1.23263	2.17417	3.67826	6.44131	6.2807	2.81329	1.71629	1.41659	1.22035	1.06992	0.999749	1.03078	1.06387	1.11316	1.14856
	0.809946	0.822681	1.07483	1.65426	2.18402	2.9514	4.47243	7.27628	8.19853	7.63103	5.81189	3.47817	2.76619	2.28517	1.98771	1.77929	1.3339	1.03085	0.866184	0.823248	0.768064
	1.05581	1.09434	1.19787	1.49731	1.95552	2.26232	2.46915	4.82261	7.76705	8.65241	4.19547	1.98056	1.58624	1.24227	0.994247	1.02938	1.20272	1.32543	1.44779	1.46458	1.49502
	1.4057	1.52741	1.74806	2.04845	2.1312	2.58624	3.74424	5.7694	7.10773	7.39926	5.14416	3.06807	2.28537	1.76166	1.4884	1.39329	1.26867	1.265	1.12585	1.03734	0.877492
	1.33583	1.47902	1.64976	1.82499	2.18205	2.73863	3.1562	4.70509	5.82855	6.05269	3.90689	2.24334	1.83613	1.54441	1.44305	1.53253	1.4521	1.28462	1.2002	1.17424	1.08544
	2.14076	2.17225	2.20121	2.35282	2.71152	3.5851	4.49442	6.03465	6.10048	5.66441	3.85981	1.92038	1.60316	1.43658	0.972881	0.844467	0.778226	0.726213	0.688883	0.688531	0.669668
	0.9639	1.28985	2.02007	2.46457	2.49183	2.41357	2.56231	3.80959	5.26267	6.03219	4.66258	2.547	1.44638	1.22568	1.20361	1.23126	1.21929	1.14658	1.11939	1.11331	1.0711
siAKAP6	1.01766	1.10283	1.1472	1.15057	0.996483	0.855238	0.795901	0.866738	1.25153	2.40304	3.52306	2.41206	2.04738	1.80445	1.59746	1.58946	1.59035	1.65529	1.64431	1.46019	1.39779
	1.06479	0.993527	0.995412	0.990501	0.958008	1.11409	1.21068	1.26307	1.83417	2.96992	3.4293	3.18177	2.63839	2.04828	1.4926	1.68419	1.95971	2.05673	2.02135	1.68737	1.54122
	0.782921	0.774677	0.668653	0.652222	0.652143	0.709448	0.754796	1.12092	2.0464	4.11407	4.94171	3.37072	3.43953	3.20918	2.20185	1.78549	1.60039	1.4609	1.34402	1.06569	0.976293
	0.696011	0.663455	0.695394	0.650728	0.678294	0.773929	0.81514	1.11521	1.46374	1.69612	2.19985	2.60199	2.9053	2.89167	2.3398	2.26425	2.21332	2.17514	1.9608	1.62287	1.84818
	0.587176	0.634218	0.651295	0.718086	0.744138	0.726745	0.855713	1.0617	1.47547	1.55777	1.55739	1.71771	1.79656	1.68483	1.77463	1.64485	1.5326	1.50005	1.3547	1.27479	1.1481
	0.69984	0.680343	0.655116	0.671721	0.678294	0.660344	0.646874	0.645376	0.701617	0.803778	1.06283	1.39872	1.63754	1.79203	1.7164	1.50101	1.44872	1.48859	1.47872	1.50388	1.46604
	0.711031	0.617876	0.740046	0.734932	0.677814	0.663836	0.704505	0.890305	1.32734	1.65481	2.06191	2.15939	2.03593	2.14266	2.47766	2.68582	2.53039	2.26427	2.01353	1.96126	1.73674
	0.838677	0.806905	0.988619	1.15072	1.06352	0.835348	0.763426	0.95951	1.31786	2.19083	3.45651	2.83117	2.39933	2.22465	1.89098	1.72306	1.60593	1.60409	1.57785	1.37708	1.19425
	0.850245	0.899822	0.80024	0.806554	0.827838	0.984899	1.20523	1.58874	2.80664	4.09872	4.28283	2.73596	2.42702	2.2419	1.94205	1.97242	1.68524	1.37711	1.09318	0.836352	0.767644
	1.09034	1.22531	1.26679	1.17326	1.07033	0.946388	1.0645	1.45566	1.87579	2.95638	4.55467	3.45797	3.10484	2.53762	1.71362	1.64242	1.80315	1.62635	1.16036	0.892772	0.839774
	0.928524	1.0173	1.24633	1.20579	1.07563	1.09583	1.18654	1.44634	1.50586	1.73999	1.61621	1.54562	1.7056	1.78531	1.84966	1.80751	1.33156	1.01918	0.880851	0.943612	0.991545
	0.680388	0.638592	0.674486	0.672	0.650717	0.620572	0.601448	0.734948	0.946431	1.38052	2.38199	2.55118	2.14747	2.11861	2.25836	2.25166	2.0739	1.98638	1.73528	1.3968	1.2736
	0.697531	0.66899	0.656077	0.652403	0.658886	0.680625	0.731855	0.930923	1.35003	2.30914	3.75524	3.98933	4.08079	3.67744	2.37202	2.15638	2.16133	2.11988	1.96324	1.88734	1.82088
	1.03993	1.07789	1.07268	0.875176	0.802169	0.752633	0.731076	0.726152	0.870069	1.26293	1.89051	1.79892	1.83059	1.84899	1.59743	1.35753	1.30451	1.24497	1.12359	1.02651	1.08376
	0.711828	0.697538	0.686224	0.679775	0.689209	0.824664	1.11368	2.45213	3.75236	4.0578	3.65759	3.08127	2.935	2.70282	2.11006	1.77292	1.51757	1.35577	1.14222	0.954699	1.01979
	0.786252	0.868432	1.11725	1.47745	1.56066	1.51165	1.51913	1.56904	1.73138	2.27529	2.40639	2.26333	2.227	2.40159	2.54845	2.1865	2.08096	1.81447	1.44351	1.39146	1.35582
	1.10506	1.09797	0.896591	0.692401	0.683716	0.79279	1.02993	1.63879	1.80332	1.83043	1.7735	1.49498	1.1941	1.06034	1.00067	1.05062	1.11232	1.17083	1.20635	1.19092	1.23801
	0.775642	0.816982	0.875977	0.964866	1.01125	0.916139	1.01897	1.11519	1.29117	1.69877	1.91463	1.92623	1.8838	1.72064	1.5855	1.35926	1.38013	1.58054	1.7545	1.61741	1.42398
	0.686909	0.717785	0.774924	0.902426	1.124	1.26498	1.39064	1.85224	3.54253	6.10163	5.33787	2.85604	2.11738	1.91403	1.67345	1.61818	1.79351	1.92957	1.76656	1.48137	1.48066
	0.647248	0.627015	0.611259	0.599168	0.583383	0.618143	0.678354	1.01473	1.4985	2.36334	2.97705	2.49662	2.40288	2.37467	2.10497	1.85597	1.62385	1.72823	2.03377	1.78947	1.56079
	1.03806	0.986289	0.859049	0.826578	0.816082	0.85109	0.90023	1.22567	1.78743	2.53999	2.00883	1.77675	1.85469	1.76452	1.44542	1.37078	1.18067	0.932922	0.897406	0.912155	0.898212
	0.646911	0.635265	0.654326	0.707989	0.743242	0.718279	0.808256	1.24002	1.6602	2.34555	4.13983	3.79668	2.6387	2.31892	1.90772	1.65355	1.6911	1.77243	1.68555	1.71665	1.54437
	0.61997	0.621765	0.556714	0.533717	0.591531	0.668855	0.714741	0.87983	1.16773	1.62016	1.93002	1.76521	1.77095	1.62158	1.6026	1.42225	1.33133	1.42687	1.44182	1.23415	1.09096
	0.635678	0.64321	0.639889	0.65081	0.651536	0.631243	0.637895	0.696306	0.823887	1.08941	2.3853	3.72469	4.08598	3.54108	3.2901	2.95825	2.24479	1.94331	1.79558	1.65708	1.6668

## Sheet: Figure 3D
Within each row, compare columns (simple effects within rows)
Number of families	21
Number of comparisons per family	2
Alpha	0.05
Bonferroni's multiple comparisons test	Predicted (LS) mean diff,	95,00% CI of diff,	Significant?	Summary	Adjusted P Value
-2
siControl vs. siAKAP9	0.213	-0,2962 to 0,7221	No	ns	0.6962
siControl vs. siPcnt	0.3442	-0,1104 to 0,7989	No	ns	0.1791
-1,8
siControl vs. siAKAP9	0.2741	-0,2350 to 0,7833	No	ns	0.4543
siControl vs. siPcnt	0.3406	-0,1140 to 0,7952	No	ns	0.186
-1,6
siControl vs. siAKAP9	0.3998	-0,1093 to 0,9089	No	ns	0.1566
siControl vs. siPcnt	0.4369	-0,01771 to 0,8916	No	ns	0.0624
-1,4
siControl vs. siAKAP9	0.5874	0,07828 to 1,097	Yes	*	0.0195
siControl vs. siPcnt	0.5105	0,05585 to 0,9651	Yes	*	0.0237
-1,2
siControl vs. siAKAP9	0.7954	0,2863 to 1,305	Yes	***	0.0009
siControl vs. siPcnt	0.5464	0,09174 to 1,001	Yes	*	0.0142
-1
siControl vs. siAKAP9	1.182	0,6733 to 1,692	Yes	****	<0,0001
siControl vs. siPcnt	0.7682	0,3135 to 1,223	Yes	***	0.0003
-0,8
siControl vs. siAKAP9	1.718	1,209 to 2,227	Yes	****	<0,0001
siControl vs. siPcnt	0.418	-0,03658 to 0,8727	No	ns	0.0785
-0,6
siControl vs. siAKAP9	3.243	2,734 to 3,752	Yes	****	<0,0001
siControl vs. siPcnt	0.7068	0,2521 to 1,161	Yes	**	0.001
-0,4
siControl vs. siAKAP9	4.906	4,396 to 5,415	Yes	****	<0,0001
siControl vs. siPcnt	-1.178	-1,633 to -0,7238	Yes	****	<0,0001
-0,2
siControl vs. siAKAP9	5.547	5,038 to 6,056	Yes	****	<0,0001
siControl vs. siPcnt	-0.9993	-1,454 to -0,5447	Yes	****	<0,0001
0
siControl vs. siAKAP9	2.473	1,964 to 2,982	Yes	****	<0,0001
siControl vs. siPcnt	-1.323	-1,777 to -0,8679	Yes	****	<0,0001
0,2
siControl vs. siAKAP9	-0.2643	-0,7734 to 0,2448	No	ns	0.4886
siControl vs. siPcnt	-0.5089	-0,9635 to -0,05423	Yes	*	0.0243
0,4
siControl vs. siAKAP9	-0.7409	-1,250 to -0,2318	Yes	**	0.0022
siControl vs. siPcnt	-0.296	-0,7506 to 0,1586	No	ns	0.2885
0,6
siControl vs. siAKAP9	-0.7884	-1,298 to -0,2793	Yes	**	0.0011
siControl vs. siPcnt	-0.231	-0,6856 to 0,2236	No	ns	0.5089
0,8
siControl vs. siAKAP9	-0.7209	-1,230 to -0,2118	Yes	**	0.003
siControl vs. siPcnt	-0.3141	-0,7688 to 0,1405	No	ns	0.2425
1
siControl vs. siAKAP9	-0.6139	-1,123 to -0,1048	Yes	*	0.0138
siControl vs. siPcnt	-0.2828	-0,7375 to 0,1718	No	ns	0.3259
1,2
siControl vs. siAKAP9	-0.5123	-1,021 to -0,003141	Yes	*	0.0482
siControl vs. siPcnt	-0.1908	-0,6454 to 0,2638	No	ns	0.6931
1,4
siControl vs. siAKAP9	-0.4551	-0,9642 to 0,05405	No	ns	0.0902
siControl vs. siPcnt	-0.1678	-0,6224 to 0,2868	No	ns	0.8155
1,6
siControl vs. siAKAP9	-0.4043	-0,9134 to 0,1048	No	ns	0.15
siControl vs. siPcnt	-0.1351	-0,5897 to 0,3195	No	ns	>0,9999
1,8
siControl vs. siAKAP9	-0.4014	-0,9106 to 0,1077	No	ns	0.1542
siControl vs. siPcnt	-0.1468	-0,6015 to 0,3078	No	ns	0.9374
2
siControl vs. siAKAP9	-0.4206	-0,9297 to 0,08852	No	ns	0.128
siControl vs. siPcnt	0.205	-0,2496 to 0,6597	No	ns	0.6235
Test details	Predicted (LS) mean 1	Predicted (LS) mean 2	Predicted (LS) mean diff,	SE of diff,	N1	N2	t	DF
-2
siControl vs. siAKAP9	1.16	0.9473	0.213	0.2269	24	17	0.9386	1344
siControl vs. siPcnt	1.16	0.8161	0.3442	0.2026	24	26	1.699	1344
-1,8
siControl vs. siAKAP9	1.189	0.9149	0.2741	0.2269	24	17	1.208	1344
siControl vs. siPcnt	1.189	0.8485	0.3406	0.2026	24	26	1.681	1344
-1,6
siControl vs. siAKAP9	1.291	0.8917	0.3998	0.2269	24	17	1.762	1344
siControl vs. siPcnt	1.291	0.8545	0.4369	0.2026	24	26	2.157	1344
-1,4
siControl vs. siAKAP9	1.47	0.8822	0.5874	0.2269	24	17	2.589	1344
siControl vs. siPcnt	1.47	0.9592	0.5105	0.2026	24	26	2.52	1344
-1,2
siControl vs. siAKAP9	1.672	0.8762	0.7954	0.2269	24	17	3.506	1344
siControl vs. siPcnt	1.672	1.125	0.5464	0.2026	24	26	2.697	1344
-1
siControl vs. siAKAP9	2.112	0.9293	1.182	0.2269	24	17	5.211	1344
siControl vs. siPcnt	2.112	1.344	0.7682	0.2026	24	26	3.791	1344
-0,8
siControl vs. siAKAP9	2.731	1.013	1.718	0.2269	24	17	7.571	1344
siControl vs. siPcnt	2.731	2.313	0.418	0.2026	24	26	2.063	1344
-0,6
siControl vs. siAKAP9	4.5	1.257	3.243	0.2269	24	17	14.29	1344
siControl vs. siPcnt	4.5	3.794	0.7068	0.2026	24	26	3.488	1344
-0,4
siControl vs. siAKAP9	6.531	1.626	4.906	0.2269	24	17	21.62	1344
siControl vs. siPcnt	6.531	7.71	-1.178	0.2026	24	26	5.817	1344
-0,2
siControl vs. siAKAP9	7.774	2.227	5.547	0.2269	24	17	24.45	1344
siControl vs. siPcnt	7.774	8.773	-0.9993	0.2026	24	26	4.932	1344
0
siControl vs. siAKAP9	4.996	2.523	2.473	0.2269	24	17	10.9	1344
siControl vs. siPcnt	4.996	6.319	-1.323	0.2026	24	26	6.528	1344
0,2
siControl vs. siAKAP9	2.22	2.484	-0.2643	0.2269	24	17	1.165	1344
siControl vs. siPcnt	2.22	2.729	-0.5089	0.2026	24	26	2.512	1344
0,4
siControl vs. siAKAP9	1.617	2.358	-0.7409	0.2269	24	17	3.266	1344
siControl vs. siPcnt	1.617	1.913	-0.296	0.2026	24	26	1.461	1344
0,6
siControl vs. siAKAP9	1.405	2.193	-0.7884	0.2269	24	17	3.475	1344
siControl vs. siPcnt	1.405	1.636	-0.231	0.2026	24	26	1.14	1344
0,8
siControl vs. siAKAP9	1.254	1.974	-0.7209	0.2269	24	17	3.177	1344
siControl vs. siPcnt	1.254	1.568	-0.3141	0.2026	24	26	1.55	1344
1
siControl vs. siAKAP9	1.209	1.823	-0.6139	0.2269	24	17	2.706	1344
siControl vs. siPcnt	1.209	1.492	-0.2828	0.2026	24	26	1.396	1344
1,2
siControl vs. siAKAP9	1.157	1.669	-0.5123	0.2269	24	17	2.258	1344
siControl vs. siPcnt	1.157	1.348	-0.1908	0.2026	24	26	0.9416	1344
1,4
siControl vs. siAKAP9	1.102	1.557	-0.4551	0.2269	24	17	2.006	1344
siControl vs. siPcnt	1.102	1.269	-0.1678	0.2026	24	26	0.8281	1344
1,6
siControl vs. siAKAP9	1.071	1.475	-0.4043	0.2269	24	17	1.782	1344
siControl vs. siPcnt	1.071	1.206	-0.1351	0.2026	24	26	0.6668	1344
1,8
siControl vs. siAKAP9	1.051	1.453	-0.4014	0.2269	24	17	1.769	1344
siControl vs. siPcnt	1.051	1.198	-0.1468	0.2026	24	26	0.7248	1344
2
siControl vs. siAKAP9	1.003	1.423	-0.4206	0.2269	24	17	1.854	1344
siControl vs. siPcnt	1.003	0.7977	0.205	0.2026	24	26	1.012	1344

## Sheet: Raw_Figure 3D
	Distance from nuclear edge
	-2	-1.8	-1.6	-1.4	-1.2	-1	-0.8	-0.6	-0.4	-0.2	0	0.2	0.4	0.6	0.8	1	1.2	1.4	1.6	1.8	2
siControl	1.48755	1.71063	1.9069	2.2008	2.21793	2.57121	2.90983	4.64056	6.48358	7.33463	5.13155	2.71407	1.87879	1.44989	1.01673	0.875899	0.895162	0.947651	0.902921	0.878707	0.860084
	0.893593	0.869086	0.864424	0.865796	0.960029	1.36003	1.84596	3.21217	5.3798	8.13104	4.77775	1.59903	1.157	1.1203	1.06049	1.04506	0.989786	1.09562	1.33804	1.63892	1.58544
	0.769367	0.776765	0.871757	0.935842	1.10548	1.51867	1.90096	3.31504	6.19559	7.22097	5.27124	2.41511	1.41108	0.998619	0.845439	0.856374	0.911438	0.885918	0.89388	0.890261	0.875017
	1.269	1.19701	1.19339	1.22254	1.40372	1.62997	1.99878	3.37554	5.99861	9.70924	6.698	2.2453	1.30785	1.04128	1.00411	1.0228	1.12458	0.98728	0.78816	0.67975	0.715227
	1.49915	1.39532	1.20055	1.30759	1.67231	2.4375	3.67095	6.14638	7.13688	6.34345	5.05506	2.27196	1.30923	1.00198	0.860447	0.852255	0.786	0.768555	0.792001	0.864862	0.903396
	1.41738	1.56715	1.72283	1.8653	1.78058	1.9552	2.45057	4.41207	7.46946	8.77216	4.65257	2.12615	1.73982	1.63264	1.32658	1.34763	1.29631	1.23372	1.27635	1.35317	1.19624
	1.20819	1.36429	1.50935	1.63868	1.88769	2.47216	3.10308	5.18355	6.99606	8.02513	4.92447	2.00454	1.78475	1.59067	1.2654	1.21452	1.15724	1.06694	1.09723	1.28392	1.30222
	0.808505	0.845044	1.04825	1.43697	2.21095	4.16112	5.77358	6.82062	7.36023	7.06586	3.74138	1.84048	1.35369	1.0965	0.992168	0.979159	1.01814	0.945609	0.784664	0.721357	0.69267
	0.681069	0.641282	0.630225	0.617999	0.637743	0.789438	1.24167	3.37659	6.34519	7.8659	4.57927	2.10996	1.90809	2.01517	1.90454	1.83945	1.66333	1.44331	1.40596	1.15208	1.03919
	1.60782	1.49742	1.15782	1.08856	1.1135	1.48277	2.01306	3.01873	4.59723	8.10706	6.60965	2.0428	1.48004	1.28901	1.24814	1.16622	1.07275	0.966599	0.880369	0.856709	0.850117
	0.915176	0.783837	0.724381	0.706942	0.753984	0.885736	1.10129	1.91308	3.84347	7.6634	6.92362	2.38416	1.19173	0.905483	0.77888	0.76904	0.775347	0.774188	0.805286	0.818425	0.805556
	0.723224	0.680897	0.67723	0.687102	0.698303	0.785389	1.02612	2.74044	6.6588	8.79187	5.03716	1.66822	1.11429	0.988482	1.12576	1.33925	1.62982	1.62624	1.35487	1.10894	1.00072
	1.55078	1.27151	1.05971	1.18401	1.49296	1.93148	2.6407	5.53634	8.46104	9.36007	4.73187	1.72815	1.19489	1.05412	1.03943	1.02505	1.0625	1.04371	0.872212	0.816298	0.762489
	0.711506	0.773704	0.87764	1.03341	1.25787	1.6625	1.90136	2.98387	5.68731	8.04963	5.4375	2.22842	1.70037	1.64949	1.41074	1.20059	1.0236	1.02124	1.23049	1.17622	1.05016
	0.734499	0.746015	0.820956	0.899039	1.05857	1.39347	2.1808	5.5173	9.30521	10.0533	4.64419	1.94649	1.55476	1.62495	1.79787	1.57885	1.2954	1.1403	1.06095	1.07325	1.10528
	1.40377	1.48795	2.01702	2.35948	2.58692	3.22149	3.97005	6.1178	8.08966	8.03189	3.48871	1.5265	1.41808	1.38553	1.16145	1.10271	1.14556	1.08645	1.11255	0.996576	0.814407
	1.62388	1.63582	1.79997	2.31854	2.61514	2.90546	3.688	5.1094	6.79637	8.17059	4.34324	2.37438	2.0642	1.95261	1.93754	1.9194	1.66857	1.59709	1.59185	1.50539	1.39226
	0.831292	0.908551	1.02112	1.06004	1.01014	0.981315	1.23263	2.17417	3.67826	6.44131	6.2807	2.81329	1.71629	1.41659	1.22035	1.06992	0.999749	1.03078	1.06387	1.11316	1.14856
	0.809946	0.822681	1.07483	1.65426	2.18402	2.9514	4.47243	7.27628	8.19853	7.63103	5.81189	3.47817	2.76619	2.28517	1.98771	1.77929	1.3339	1.03085	0.866184	0.823248	0.768064
	1.05581	1.09434	1.19787	1.49731	1.95552	2.26232	2.46915	4.82261	7.76705	8.65241	4.19547	1.98056	1.58624	1.24227	0.994247	1.02938	1.20272	1.32543	1.44779	1.46458	1.49502
	1.4057	1.52741	1.74806	2.04845	2.1312	2.58624	3.74424	5.7694	7.10773	7.39926	5.14416	3.06807	2.28537	1.76166	1.4884	1.39329	1.26867	1.265	1.12585	1.03734	0.877492
	1.33583	1.47902	1.64976	1.82499	2.18205	2.73863	3.1562	4.70509	5.82855	6.05269	3.90689	2.24334	1.83613	1.54441	1.44305	1.53253	1.4521	1.28462	1.2002	1.17424	1.08544
	2.14076	2.17225	2.20121	2.35282	2.71152	3.5851	4.49442	6.03465	6.10048	5.66441	3.85981	1.92038	1.60316	1.43658	0.972881	0.844467	0.778226	0.726213	0.688883	0.688531	0.669668
	0.9639	1.28985	2.02007	2.46457	2.49183	2.41357	2.56231	3.80959	5.26267	6.03219	4.66258	2.547	1.44638	1.22568	1.20361	1.23126	1.21929	1.14658	1.11939	1.11331	1.0711
siAKAP9	1.18653	1.06332	1.00549	1.05543	1.15533	1.394	1.70967	1.99541	2.16957	2.56756	3.53652	3.40377	3.08742	2.97696	2.00085	1.47283	1.20468	0.984786	0.755478	0.685865	0.678937
	0.601553	0.585725	0.61169	0.641267	0.605195	0.590067	0.626911	0.887881	1.5675	2.51021	2.55222	2.36072	2.64022	2.45846	2.18916	1.95796	1.60688	1.50991	1.48329	1.56121	1.59677
	1.05145	1.19488	1.52498	1.53841	1.29365	0.972447	0.957389	1.32133	1.67842	2.23604	2.39473	1.96148	2.07717	2.33682	2.27468	1.87719	1.46319	1.20396	1.09435	1.25202	1.18296
	0.73296	0.716267	0.732938	0.691613	0.670935	0.697929	0.749997	0.892574	1.29225	2.1748	2.54132	2.40826	2.22683	1.7106	1.1544	1.19509	1.21619	1.29643	1.36373	1.59594	1.70254
	0.705676	0.779038	0.857871	0.811979	0.739586	0.698615	0.72946	1.11534	1.86238	3.12042	3.69177	3.43912	2.80886	2.42248	2.28747	2.2665	2.00782	1.80624	1.76982	1.58748	1.35607
	0.657605	0.73564	0.857297	0.874481	0.793519	0.804358	0.883812	1.05269	1.36845	1.85882	2.74058	3.45588	3.59193	3.40153	2.86912	2.09539	1.76553	1.62993	1.31886	1.09063	1.03353
	1.6279	1.64667	1.32646	1.14606	1.16667	1.67172	2.02295	2.89689	3.33065	3.58698	3.67049	3.52636	3.03419	2.58472	2.41542	2.13756	1.84321	1.85437	1.68522	1.34254	1.09774
	0.665844	0.602573	0.585939	0.610788	0.639669	0.699593	0.787862	1.16662	1.45839	2.17587	3.01958	2.94105	2.67302	2.3126	2.17856	2.07816	1.93519	1.89153	1.84014	1.78867	1.81896
	0.807465	0.793928	0.707978	0.806376	1.06197	1.35462	1.57633	1.71948	2.12325	2.86926	2.47934	1.84448	1.62712	1.51665	1.48248	1.31524	1.28943	1.34482	1.40939	1.39624	1.2448
	0.730867	0.677925	0.634795	0.621675	0.619723	0.615553	0.677775	0.939107	1.34367	1.92598	1.9644	1.83405	1.7733	1.61186	1.22147	1.25878	1.33342	1.37475	1.62696	1.65596	1.71116
	1.74997	1.42376	1.18714	1.01156	0.859666	0.793201	0.79795	1.06269	1.62721	2.45868	2.82737	2.14005	1.86665	1.76182	1.67712	1.61643	1.59212	1.56027	1.34664	1.18661	1.319
	0.746845	0.783317	0.854555	0.896135	0.874451	0.795427	0.816204	1.06501	1.8073	3.1585	2.44329	1.80535	1.60059	1.76903	2.17254	2.41531	2.3419	1.83517	1.72203	1.96012	2.07309
	1.22205	1.02911	0.905048	0.953533	0.975868	0.943339	0.878099	0.913144	1.06017	1.49673	2.36544	3.00754	2.55675	1.92143	1.42106	1.31974	1.05259	1.02081	1.03235	1.15009	1.35494
	0.868317	0.906191	0.8698	0.819377	0.875569	1.08152	1.0919	0.918299	0.97793	1.20689	1.67499	2.4094	2.90527	2.71755	2.44371	2.18004	2.12745	2.08106	2.09135	1.87385	1.62903
	0.955024	0.802436	0.748573	0.75461	0.822564	0.860244	0.881091	1.01589	1.24808	1.4955	1.90513	2.25101	2.18222	2.07603	1.91246	1.9229	1.90827	1.63771	1.59925	1.7066	1.47731
	0.779936	0.869732	0.870707	0.844658	0.792164	0.840742	0.975153	1.32568	1.6826	1.99987	1.99029	2.08465	1.77199	1.80738	2.09437	2.29041	2.26871	2.07185	1.60058	1.36911	1.36149
	1.01496	0.943397	0.876995	0.919743	0.949261	0.985463	1.06443	1.08707	1.03653	1.01138	1.09834	1.35711	1.66148	1.89435	1.77108	1.58889	1.42256	1.36098	1.33773	1.49217	1.5586
siPcnt	1.2097	1.44044	1.36709	1.25347	1.39817	1.72151	2.99459	4.91028	9.90774	9.23222	5.25637	1.79667	1.255	1.16069	1.16977	1.13447	1.08489	0.955933	0.811364	0.777499	1.06881
	0.939472	1.06547	1.21429	1.45504	1.66471	1.83302	2.38629	3.36305	6.23109	8.21712	7.48064	3.57895	1.98679	1.54693	1.43879	1.32043	1.07004	0.951205	0.808911	0.724176	0.90115
	1.15516	0.937616	0.98562	1.07429	1.3613	1.76415	2.81489	4.04758	8.15604	8.92112	7.23183	4.04082	2.41554	1.83122	1.72273	1.48159	1.25407	1.27472	1.23716	1.13331	1.16305
	0.977862	0.92937	0.736164	0.647373	0.741199	0.862773	1.78577	3.42318	9.34435	11.0186	7.08882	2.65116	1.86436	1.49276	1.36465	1.20446	1.06602	0.957462	0.735804	0.74289	0.836448
	1.27002	2.1956	2.06716	2.28681	2.63068	2.79605	2.83053	3.89985	5.77069	5.66749	4.0761	2.34626	2.19256	2.36542	2.19976	2.06292	1.8399	1.44509	1.12121	1.05941	0.869013
	0.557203	0.544339	0.543196	0.664075	0.850639	1.09699	2.80011	4.58589	8.99449	10.31	6.62792	2.38321	1.94356	1.85658	1.86315	1.9115	1.72092	1.62154	1.46347	1.41834	0.564004
	0.5912	0.564647	0.573102	0.697711	0.820982	0.984178	1.9497	4.29655	11.7211	11.4707	5.28256	2.0439	1.57537	1.2663	1.35037	1.41045	1.6587	1.59687	1.47254	1.43138	0.584101
	0.561987	0.522237	0.519269	0.566871	0.63451	0.792047	1.65452	3.23274	6.57358	7.96229	6.12501	2.95832	2.17	2.10273	2.1188	2.09542	1.73678	1.57815	1.64741	1.69362	0.549015
	0.936268	0.861695	0.823781	0.887233	1.06567	1.35249	2.87315	5.36468	9.70577	9.04471	5.56165	2.59077	2.4397	2.42286	2.39586	2.1377	1.42333	1.22418	1.07798	0.977325	0.9565
	1.52431	1.68675	1.82015	1.90691	2.04655	2.13381	2.28377	3.07948	5.96948	6.85712	5.18312	2.61451	1.64589	1.17428	1.13392	1.03066	0.72649	0.695949	0.685686	0.651047	1.54953
	1.19966	1.12862	0.873123	0.798479	0.867088	0.935993	1.4674	2.57324	4.91173	4.87937	2.75825	1.47261	1.31754	1.19442	1.10446	0.970308	0.769079	0.640699	0.554186	0.557092	1.34048
	0.658963	0.672172	0.87464	1.38901	1.69044	2.17374	3.47801	4.93989	8.44071	7.53035	4.0997	1.64965	1.31731	1.42981	1.61953	1.83806	1.82651	1.7537	1.61429	1.52716	0.649947
	0.839626	1.05331	1.07221	0.943773	0.915442	0.919709	1.54913	2.77636	5.76712	6.81619	4.79337	1.88548	1.41572	1.24272	1.25843	1.33311	1.44593	1.31276	1.06523	1.0334	0.803366
	0.546072	0.553454	0.519648	0.57894	0.606952	0.667284	1.23399	2.51242	6.74328	7.71061	4.92478	1.75141	1.51157	1.4932	1.37733	1.13304	1.0208	1.07596	1.03255	1.12359	0.533673
	0.772244	0.630111	0.616724	0.585312	0.67899	0.804728	1.49983	3.13374	9.02226	12.2834	9.22466	3.1716	2.17009	2.04555	2.00519	1.9911	1.83472	1.7096	1.45324	1.35323	0.84273
	0.624863	0.634291	0.647818	0.638895	0.715732	0.920463	2.05116	3.57883	7.76008	9.12001	7.8515	4.39376	3.03085	2.28592	1.94295	1.59369	1.06147	0.990165	1.26619	1.39814	0.601692
	0.738826	0.820427	0.962968	0.909723	0.872725	1.02484	1.7085	3.05514	8.02542	9.64975	7.37036	2.76356	2.20638	1.77178	1.64816	1.68394	1.97213	1.84587	1.60834	1.46639	0.749483
	0.457391	0.437219	0.491854	0.746717	1.19049	1.55144	2.68578	3.71595	6.05384	7.04481	4.88801	1.76021	1.26673	1.37099	1.56787	1.64562	1.56588	1.51257	1.58146	1.71389	0.453561
	0.665669	0.687139	0.718221	0.813067	0.924188	1.0787	1.35255	2.35703	6.97737	9.58592	7.35821	2.34809	1.20819	0.897226	0.990115	1.25575	1.5236	1.62503	1.94943	2.01952	0.662666
	0.652111	0.59789	0.618405	0.721778	0.911768	1.31705	3.8518	6.09302	9.74775	10.4997	7.83063	3.40039	1.8542	1.16002	0.946714	0.699183	0.579406	0.537079	0.526707	0.55121	0.698431
	1.15118	1.01032	1.10707	1.99006	2.58629	2.96007	4.05064	5.78553	8.3947	8.98809	7.09462	3.39984	2.18981	1.61162	1.64902	1.75954	1.59917	1.44159	1.21877	1.11896	1.07894
	0.680549	0.668586	0.636968	0.757911	0.991779	1.36338	2.93763	5.19391	9.25119	10.2541	7.71632	2.87248	2.11702	1.83593	1.57444	1.36669	1.15946	1.20112	1.13348	1.0471	0.656949
	0.603593	0.55204	0.571442	0.728447	1.03639	1.62343	3.63742	4.3573	6.9962	8.29181	5.62141	2.57179	2.50299	2.37948	2.24934	2.12285	1.83653	1.82622	1.94316	1.90868	0.600899
	0.650145	0.660072	0.660126	0.662149	0.712334	0.769818	1.21935	2.2037	5.57099	6.58239	4.66742	1.64454	1.14878	1.06487	0.997879	0.975977	1.00228	1.0382	1.23903	1.50612	0.678709
	0.656981	0.664507	0.667212	0.668725	0.718236	0.737506	1.2677	2.57138	6.94501	9.86437	8.77535	3.39784	1.7483	1.40455	1.31522	1.19406	1.1389	1.1341	1.13863	1.17349	0.676048
	0.597535	0.542079	0.530023	0.56514	0.624473	0.748016	1.77703	3.5852	7.46835	10.2973	9.39921	5.45886	3.24453	2.11584	1.75611	1.43373	1.12773	1.05977	0.967819	1.04263	0.671422
