# Supplementary material for: AKAP6 orchestrates the nuclear envelope microtubule-organizing center by linking golgi and nucleus via AKAP9
Source: eLife. 2020 Dec 9;9:e61669. doi: 10.7554/eLife.61669 (PMC7725499; doi:10.7554/eLife.61669)
Supplement: Figure 4—source data 1. [file elife-61669-fig4-data1.xlsx]

## Sheet: Figure 4B
Compare each cell mean with the other cell mean in that row
Number of families	1
Number of comparisons per family	31
Alpha	0.05
Bonferroni's multiple comparisons test	Predicted (LS) mean diff,	95,00% CI of diff,	Significant?	Summary	Adjusted P Value
siControl - siAKAP6
-4,5	0.3401	0,2277 to 0,4526	Yes	****	<0,0001
-4	0.3762	0,2638 to 0,4887	Yes	****	<0,0001
-3,5	0.4118	0,2994 to 0,5243	Yes	****	<0,0001
-3	0.4037	0,2913 to 0,5162	Yes	****	<0,0001
-2,5	0.4009	0,2884 to 0,5133	Yes	****	<0,0001
-2	0.3926	0,2802 to 0,5051	Yes	****	<0,0001
-1,5	0.3934	0,2809 to 0,5058	Yes	****	<0,0001
-1	0.4181	0,3056 to 0,5305	Yes	****	<0,0001
-0,5	0.5119	0,3994 to 0,6243	Yes	****	<0,0001
0	0.6575	0,5451 to 0,7700	Yes	****	<0,0001
0,5	0.6257	0,5132 to 0,7381	Yes	****	<0,0001
1	0.4714	0,3589 to 0,5838	Yes	****	<0,0001
1,5	0.2796	0,1672 to 0,3920	Yes	****	<0,0001
2	0.1286	0,01614 to 0,2410	Yes	**	0.0096
2,5	0.04148	-0,07096 to 0,1539	No	ns	>0,9999
3	-0.009692	-0,1221 to 0,1028	No	ns	>0,9999
3,5	-0.04268	-0,1551 to 0,06976	No	ns	>0,9999
4	-0.05722	-0,1697 to 0,05522	No	ns	>0,9999
4,5	-0.08762	-0,2001 to 0,02482	No	ns	0.4335
5	-0.1166	-0,2291 to -0,004205	Yes	*	0.0332
5,5	-0.1417	-0,2541 to -0,02925	Yes	**	0.0022
6	-0.159	-0,2715 to -0,04658	Yes	***	0.0003
6,5	-0.1704	-0,2828 to -0,05795	Yes	****	<0,0001
7	-0.1818	-0,2942 to -0,06936	Yes	****	<0,0001
7,5	-0.1883	-0,3007 to -0,07581	Yes	****	<0,0001
8	-0.1956	-0,3081 to -0,08320	Yes	****	<0,0001
8,5	-0.2021	-0,3145 to -0,08966	Yes	****	<0,0001
9	-0.2059	-0,3184 to -0,09351	Yes	****	<0,0001
9,5	-0.211	-0,3234 to -0,09854	Yes	****	<0,0001
10	-0.2133	-0,3257 to -0,1008	Yes	****	<0,0001
10,5	-0.2105	-0,3230 to -0,09809	Yes	****	<0,0001
Test details	Predicted (LS) mean 1	Predicted (LS) mean 2	Predicted (LS) mean diff,	SE of diff,	N1	N2	t	DF
siControl - siAKAP6
-4,5	1.41	1.07	0.3401	0.03564	119	131	9.543	7688
-4	1.298	0.9221	0.3762	0.03564	119	131	10.56	7688
-3,5	1.288	0.8766	0.4118	0.03564	119	131	11.55	7688
-3	1.295	0.8917	0.4037	0.03564	119	131	11.33	7688
-2,5	1.306	0.9056	0.4009	0.03564	119	131	11.25	7688
-2	1.331	0.9382	0.3926	0.03564	119	131	11.02	7688
-1,5	1.377	0.9833	0.3934	0.03564	119	131	11.04	7688
-1	1.482	1.064	0.4181	0.03564	119	131	11.73	7688
-0,5	1.768	1.257	0.5119	0.03564	119	131	14.36	7688
0	2.249	1.591	0.6575	0.03564	119	131	18.45	7688
0,5	2.336	1.711	0.6257	0.03564	119	131	17.55	7688
1	2.018	1.546	0.4714	0.03564	119	131	13.23	7688
1,5	1.678	1.399	0.2796	0.03564	119	131	7.845	7688
2	1.429	1.301	0.1286	0.03564	119	131	3.608	7688
2,5	1.261	1.22	0.04148	0.03564	119	131	1.164	7688
3	1.127	1.136	-0.009692	0.03564	119	131	0.2719	7688
3,5	1.032	1.075	-0.04268	0.03564	119	131	1.197	7688
4	0.9776	1.035	-0.05722	0.03564	119	131	1.605	7688
4,5	0.9097	0.9973	-0.08762	0.03564	119	131	2.458	7688
5	0.8472	0.9639	-0.1166	0.03564	119	131	3.273	7688
5,5	0.7983	0.94	-0.1417	0.03564	119	131	3.975	7688
6	0.7561	0.9151	-0.159	0.03564	119	131	4.461	7688
6,5	0.7179	0.8883	-0.1704	0.03564	119	131	4.78	7688
7	0.6828	0.8646	-0.1818	0.03564	119	131	5.101	7688
7,5	0.6567	0.845	-0.1883	0.03564	119	131	5.282	7688
8	0.6316	0.8272	-0.1956	0.03564	119	131	5.489	7688
8,5	0.6117	0.8138	-0.2021	0.03564	119	131	5.67	7688
9	0.5986	0.8045	-0.2059	0.03564	119	131	5.778	7688
9,5	0.586	0.797	-0.211	0.03564	119	131	5.919	7688
10	0.5755	0.7887	-0.2133	0.03564	119	131	5.983	7688
10,5	0.5717	0.7822	-0.2105	0.03564	119	131	5.907	7688

## Sheet: Raw_Figure 4B
	-4.5	-4	-3.5	-3	-2.5	-2	-1.5	-1	-0.5	0	0.5	1	1.5	2	2.5	3	3.5	4	4.5	5	5.5	6	6.5	7	7.5	8	8.5	9	9.5	10	10.5
siControl	1.42805	1.24995	1.41997	1.37383	1.35118	1.37418	1.60072	1.6253	1.54928	1.72729	1.84066	1.57415	1.40131	1.26141	1.17163	1.09893	1.05569	0.983355	0.95413	0.893175	0.882036	0.830447	0.786031	0.773914	0.773158	0.73337	0.708686	0.696476	0.680865	0.642802	0.616077
	1.19951	1.23209	1.06354	1.0202	1.07534	1.06499	1.03343	1.08467	1.21362	1.48863	1.79472	1.58016	1.4553	1.40237	1.28784	1.19659	1.17362	1.10636	1.09837	1.00918	0.964286	0.952321	0.913965	0.853501	0.801031	0.776361	0.76129	0.730885	0.711379	0.662285	0.665269
	1.16337	1.24981	1.33241	1.3395	1.36096	1.34733	1.30824	1.28821	1.45141	1.68002	2.05204	1.6847	1.45603	1.19015	1.13936	1.04634	1.01358	0.978515	0.947524	0.916285	0.85189	0.798001	0.802417	0.791353	0.779569	0.756691	0.725248	0.704855	0.713981	0.715751	0.703943
	0.929089	0.865597	0.852369	0.907966	1.02374	1.03119	1.12355	1.17968	1.39111	1.77416	1.94425	1.61138	1.41319	1.27236	1.26829	1.17191	1.06637	0.942883	0.908418	0.933794	0.939798	0.905488	0.867283	0.838417	0.791591	0.767503	0.79143	0.789452	0.77131	0.738946	0.73079
	1.10265	1.18865	1.3264	1.30604	1.27424	1.29498	1.35561	1.4243	1.42267	1.64875	1.77417	1.59396	1.39255	1.27182	1.1822	1.11298	1.10333	1.04046	1.00672	0.964863	0.897476	0.837714	0.812679	0.779453	0.761284	0.751053	0.765414	0.766904	0.736322	0.707134	0.732538
	1.5011	1.49819	1.47321	1.42382	1.3347	1.33566	1.30808	1.28635	1.37312	1.6067	1.79702	1.5177	1.3901	1.24758	1.17395	1.10232	1.06921	0.98654	0.957749	0.916042	0.870049	0.821922	0.784651	0.762714	0.692692	0.662363	0.647822	0.62607	0.613595	0.601175	0.580555
	1.10424	1.11461	1.08506	1.05392	1.17264	1.15858	1.07453	1.18999	1.33098	1.43704	1.63789	1.52704	1.53061	1.36291	1.28104	1.1758	1.1057	1.03589	1.02026	1.02684	0.995551	0.922082	0.86979	0.840607	0.841584	0.789569	0.774299	0.738741	0.725646	0.705822	0.671213
	1.2547	1.2436	1.27797	1.51444	1.52441	1.49468	1.40414	1.60292	1.86589	1.8469	1.88589	1.6612	1.43375	1.31185	1.26436	1.16174	1.03345	0.941457	0.866388	0.857807	0.82618	0.743868	0.742721	0.719224	0.693883	0.668087	0.676503	0.658753	0.66062	0.685199	0.661343
	1.37064	1.36047	1.16281	1.04035	1.05723	1.09922	1.01976	1.18673	1.48778	1.99467	1.97418	1.54554	1.40823	1.24739	1.14463	1.01961	0.991132	1.01168	0.986017	0.977487	0.93633	0.909935	0.929705	0.831952	0.791176	0.754014	0.762233	0.788316	0.768131	0.688788	0.677755
	1.32444	1.05849	1.02977	0.942833	1.04975	1.0584	1.05613	0.996948	1.10485	1.79905	1.95213	1.72344	1.41905	1.28647	1.13236	1.09771	1.08509	0.983994	0.894476	0.886816	0.938766	0.857949	0.896969	0.889959	0.84489	0.818378	0.783694	0.799148	0.816496	0.826379	0.792345
	0.834497	0.895034	0.923511	0.84757	0.832653	0.900068	1.0311	1.23636	1.62514	1.76327	1.85284	1.57421	1.45019	1.36297	1.23346	1.17005	1.10475	0.982519	0.980435	1.00863	0.930571	0.950346	0.923515	0.865697	0.848428	0.789895	0.770906	0.762658	0.730966	0.697181	0.702489
	0.251081	0.398091	0.369655	0.480121	0.488173	0.507609	0.431027	0.504851	0.822135	1.73046	2.1912	1.85568	1.50872	1.32013	1.23041	1.19939	1.17472	1.0821	1.05831	0.969036	0.96337	0.976837	1.01443	0.994907	1.02331	0.946012	0.874257	0.849563	0.753782	0.781872	0.727453
	1.08916	0.985798	1.17295	1.20004	1.20054	1.09466	1.11976	1.20643	1.2767	1.48062	2.0356	1.84766	1.53184	1.39275	1.40424	1.29607	1.02557	0.93591	0.942929	0.863695	0.86671	0.874838	0.870035	0.834856	0.807562	0.806301	0.750113	0.775013	0.776764	0.753482	0.688003
	1.05416	0.768176	0.792087	0.794049	0.634408	0.691539	1.04519	1.16779	1.27843	1.92246	2.14035	1.63759	1.35337	1.31213	1.33049	1.26252	1.28316	1.12318	1.02267	0.99379	0.953059	0.899957	0.879059	0.896857	0.839643	0.756878	0.738326	0.746656	0.716785	0.685428	0.73774
	1.31675	1.35814	1.38955	1.35105	1.36324	1.3908	1.37892	1.49081	1.66365	1.98867	1.94146	1.83141	1.62287	1.32228	1.21542	1.0619	0.94162	0.891347	0.856477	0.913242	0.914875	0.860703	0.862301	0.769475	0.706167	0.642993	0.629758	0.6672	0.707859	0.703709	0.702039
	1.79513	1.3354	1.07664	1.11713	1.24121	1.17011	1.27311	1.32654	1.56389	1.85399	1.79513	1.56764	1.24558	1.07253	0.969211	0.901432	0.873304	0.836861	0.84049	0.849884	0.813538	0.809504	0.846752	0.928204	0.906318	0.845463	0.863086	0.871636	0.880541	0.882329	0.868006
	0.943794	1.01055	0.922346	1.02837	1.06418	1.16354	1.07924	1.08081	1.12941	1.37348	1.62444	1.70316	1.74964	1.56497	1.41137	1.16932	1.07981	1.0084	1.01015	0.981287	0.9815	0.971905	0.922371	0.903007	0.881105	0.775708	0.752291	0.701351	0.68722	0.674788	0.64984
	0.955396	1.11566	1.1406	1.15758	1.1217	1.24569	1.35578	1.35208	1.75038	2.05725	1.8989	1.63595	1.48428	1.32696	1.26869	1.19179	1.1181	0.97237	0.915219	0.894581	0.889764	0.900367	0.864616	0.823407	0.831048	0.778739	0.758926	0.696828	0.633758	0.594979	0.576618
	2.44283	2.37763	2.21983	1.97151	1.87154	1.79757	1.81164	1.97964	2.29622	2.51784	1.71546	1.50421	1.44656	1.34846	1.21775	1.07693	1.01296	0.92983	0.896236	0.825467	0.749748	0.704236	0.659478	0.621295	0.638207	0.682254	0.680875	0.589901	0.542251	0.512577	0.509258
	1.59404	1.59404	2.56209	2.48658	2.25825	2.10503	2.04185	2.09553	1.98116	1.92698	1.59404	1.16828	1.07374	0.917969	0.925804	0.873964	0.8601	0.876846	0.869692	0.798275	0.811314	0.851602	0.880491	0.868713	0.844326	0.785859	0.726936	0.703301	0.66809	0.637008	0.602429
	1.14274	1.09709	1.2259	1.28325	1.56021	1.65259	1.63475	1.6528	1.82037	2.05805	2.18876	1.67987	1.44094	1.27554	1.226	1.08772	1.02548	0.97308	0.958303	0.87246	0.859898	0.814169	0.779461	0.756917	0.732673	0.701896	0.71272	0.650085	0.624706	0.657646	0.647006
	1.47749	1.21418	1.14515	1.04152	0.888887	0.978791	1.1095	1.13102	1.55009	2.15669	2.23203	1.77603	1.66408	1.46828	1.33683	1.26669	1.27432	1.08764	0.990275	0.844423	0.833149	0.834987	0.780983	0.704577	0.661579	0.634756	0.651503	0.636345	0.61649	0.589445	0.614318
	1.13891	1.12798	1.02828	1.03328	1.02872	1.12307	1.16879	1.14948	1.19003	1.47093	1.49498	1.33946	1.13566	0.985932	0.971747	0.993587	1.00079	1.0068	0.957433	0.883926	0.881136	0.898785	0.909956	0.880084	0.883872	0.894689	0.896766	0.937265	0.968182	0.940476	0.951954
	1.49069	1.59618	1.56667	1.59846	1.61726	1.53808	1.5016	1.62497	1.91062	2.24845	2.1809	1.74908	1.41311	1.20888	1.07316	0.98424	0.874527	0.834091	0.765279	0.697331	0.674876	0.70896	0.689026	0.67841	0.647196	0.625795	0.607203	0.583141	0.558979	0.568443	0.5653
	1.24036	1.19729	1.15587	1.22179	1.23681	1.22823	1.22049	1.41505	1.92231	2.46979	2.63579	2.2695	1.86379	1.55637	1.32719	1.18856	1.06533	1.01592	0.944362	0.88018	0.797297	0.715551	0.640096	0.601979	0.572841	0.52972	0.502979	0.508976	0.49396	0.476114	0.471526
	1.5619	1.446	1.50225	1.63357	1.67842	1.76892	1.83794	1.88409	2.12337	2.52638	2.55483	2.23267	1.7984	1.50305	1.27	1.09345	0.958373	0.895369	0.785072	0.695619	0.635389	0.612293	0.600638	0.562424	0.552377	0.572098	0.57256	0.542336	0.513693	0.487721	0.485933
	0.988377	1.07345	1.16123	1.19705	1.22787	1.32916	1.38634	1.46775	1.66632	1.93342	1.83089	1.53303	1.38646	1.34769	1.27768	1.20128	1.16875	1.11994	0.992298	0.927342	0.891669	0.851765	0.794439	0.768505	0.774984	0.743939	0.721078	0.654498	0.608447	0.567126	0.543163
	1.41376	1.36577	1.36545	1.28982	1.24905	1.17943	1.16232	1.28154	1.68079	2.3005	2.50744	2.08723	1.69322	1.44878	1.21892	1.03466	0.939474	0.885725	0.820311	0.778426	0.757012	0.764748	0.740032	0.700283	0.663486	0.661171	0.625039	0.625092	0.624194	0.580304	0.577378
	1.50435	1.4639	1.32341	1.28256	1.29269	1.24991	1.27662	1.34348	1.61536	1.93959	1.88573	1.52867	1.21483	1.04452	0.947606	0.888314	0.850367	0.804137	0.761791	0.789428	0.833174	0.851229	0.838309	0.811554	0.825402	0.835148	0.850839	0.853046	0.876907	0.842253	0.834923
	1.48999	1.68048	1.73584	1.71693	1.60215	1.56993	1.65333	1.82525	2.20099	2.70269	2.51501	1.9303	1.53365	1.31607	1.2033	1.08738	0.97574	0.891739	0.760196	0.695898	0.653635	0.637371	0.603595	0.584309	0.571297	0.570171	0.61343	0.653844	0.660695	0.639684	0.646374
	1.15759	1.15436	1.25483	1.25662	1.21736	1.15458	1.22149	1.40034	1.80453	2.24863	2.2174	1.86933	1.51913	1.29105	1.13576	1.07134	0.995903	0.953619	0.913352	0.909391	0.865866	0.810578	0.732447	0.658573	0.613751	0.574464	0.553756	0.524723	0.502769	0.482385	0.469051
	1.57411	1.41587	1.34651	1.35628	1.38904	1.43123	1.52115	1.73844	1.92022	2.01862	1.83792	1.54081	1.29473	1.10674	1.00515	0.944401	0.931065	0.937862	0.940695	0.914916	0.86794	0.866781	0.840812	0.792866	0.74858	0.704774	0.683575	0.646353	0.647577	0.653097	0.637708
	1.42031	1.2992	1.16934	1.14266	1.15411	1.20676	1.29851	1.41096	1.64495	1.99372	2.02842	1.80973	1.53574	1.33372	1.16553	1.04005	0.964439	0.932104	0.8885	0.847662	0.832755	0.822223	0.796449	0.743253	0.729026	0.755206	0.724097	0.692251	0.676474	0.695454	0.696017
	1.96151	1.88064	1.77558	1.61361	1.52446	1.48203	1.50661	1.59807	1.87382	2.16622	2.02926	1.71986	1.40527	1.16915	1.0713	0.99117	0.919973	0.872797	0.829129	0.796455	0.724871	0.675774	0.666183	0.630335	0.592618	0.619581	0.604987	0.543902	0.521506	0.548835	0.558381
	1.4464	1.46354	1.44347	1.3748	1.34172	1.32309	1.42332	1.56638	1.81883	2.28293	2.21528	1.90691	1.71674	1.53868	1.36274	1.19553	1.06134	0.987485	0.89597	0.850646	0.788783	0.727358	0.682488	0.653666	0.630479	0.610638	0.616947	0.595517	0.541494	0.511694	0.503962
	0.844963	0.744437	0.766658	0.845946	0.894679	0.991969	1.12336	1.34918	1.84136	2.36057	2.33685	1.92738	1.55506	1.30474	1.14838	1.07438	1.00707	0.963635	0.897835	0.845721	0.787598	0.733464	0.718123	0.734367	0.743787	0.757329	0.760907	0.753295	0.756645	0.732917	0.712631
	1.17562	1.03005	1.01037	1.10162	1.21611	1.35884	1.48418	1.60079	1.96535	2.55792	2.57211	2.14914	1.81123	1.6155	1.43972	1.26725	1.07829	1.00474	0.927602	0.837247	0.777619	0.718412	0.675968	0.638719	0.590076	0.542956	0.52269	0.503527	0.48148	0.452953	0.444628
	1.58409	1.62586	1.53794	1.52739	1.57455	1.75772	1.89178	1.85029	1.82919	2.07132	1.91457	1.39877	1.08634	0.938826	0.861635	0.880125	1.01223	1.07138	1.03592	0.966324	0.908244	0.84253	0.75963	0.727111	0.701572	0.675741	0.66007	0.664002	0.613801	0.597736	0.607403
	1.40547	1.45033	1.52341	1.50225	1.47961	1.51401	1.41453	1.40718	1.8951	2.37072	2.13325	1.5986	1.25177	1.07014	0.971535	0.920319	0.863266	0.834274	0.823723	0.795513	0.778013	0.755765	0.73832	0.748316	0.750288	0.78761	0.781857	0.758265	0.730522	0.74474	0.758216
	0.674641	0.864637	1.00396	0.868027	0.828725	0.864367	0.903366	0.945445	1.13184	1.66477	2.09196	2.1103	1.64034	1.29735	1.13793	1.01208	0.926396	0.896285	0.876508	0.877905	0.837504	0.782115	0.762768	0.807024	0.808699	0.826122	0.878327	0.875378	0.86643	0.865247	0.849797
	0.735378	0.575211	0.551016	0.561999	0.539105	0.482939	0.567035	0.64292	0.857573	1.4115	2.49928	2.8605	2.38331	1.72608	1.35641	1.25149	1.18682	1.1433	0.999044	0.880525	0.769882	0.697981	0.691047	0.667666	0.692371	0.669309	0.638087	0.630699	0.587177	0.580808	0.577874
	1.91433	0.686335	0.509095	0.572974	0.672023	0.778216	0.822069	0.795056	0.844007	1.09522	1.91433	2.34323	2.08305	1.8275	1.62356	1.42569	1.28376	1.22437	1.13195	1.01937	0.937029	0.850871	0.798854	0.759404	0.724268	0.687985	0.659963	0.622499	0.565792	0.513749	0.503757
	1.24634	1.35673	1.36325	1.56102	1.74643	1.68172	1.63126	1.83434	2.41856	3.21262	3.78551	3.6471	2.56946	1.85038	1.47895	1.19745	0.954098	0.836578	0.721985	0.641771	0.597203	0.525429	0.424589	0.359955	0.310618	0.272794	0.282962	0.287583	0.272099	0.293625	0.306997
	0.734024	0.968199	1.03784	0.995033	0.990032	0.982393	1.10021	1.35156	1.77089	2.47017	2.69398	2.4765	1.97399	1.597	1.36977	1.26267	1.11877	1.06995	0.953009	0.853431	0.727959	0.643402	0.635171	0.631579	0.595882	0.59417	0.559841	0.522583	0.535086	0.541806	0.546407
	2.80569	0.671552	0.645369	0.614756	0.68302	0.86409	0.895981	1.12226	1.72242	2.50657	2.80569	2.62741	2.15376	1.66483	1.33996	1.16374	1.05608	1.00398	0.963484	0.897187	0.838274	0.765367	0.71661	0.649578	0.597891	0.57023	0.556253	0.526845	0.516163	0.545123	0.570009
	1.49185	1.41215	1.61308	1.64314	1.65379	1.68605	1.65654	1.66709	1.76212	2.04695	2.05192	1.84704	1.50116	1.2646	1.19656	1.12261	0.979116	0.870477	0.725126	0.643066	0.66131	0.692691	0.733883	0.730128	0.710721	0.672736	0.680874	0.718386	0.724267	0.764794	0.823669
	2.85809	0.916906	1.19575	1.2516	1.25046	1.27813	1.43636	1.57096	1.78473	2.44203	2.85809	2.47815	1.91803	1.50144	1.23496	1.09284	0.964523	0.917715	0.834505	0.771023	0.689182	0.622858	0.589807	0.570755	0.582109	0.628348	0.646138	0.641415	0.582804	0.55188	0.557052
	1.25067	1.305	1.35724	1.45222	1.47873	1.54866	1.62542	1.80293	1.95492	2.21573	2.37885	2.25488	1.88407	1.60283	1.38483	1.2121	1.06292	1.00047	0.917156	0.841188	0.744743	0.681866	0.624073	0.58333	0.53434	0.474846	0.430093	0.403363	0.390238	0.40088	0.405174
	1.44318	1.38986	1.36732	1.36692	1.36743	1.34214	1.44016	1.52277	1.74975	2.06433	2.35176	2.21064	1.80105	1.5446	1.34721	1.25031	1.15195	1.06898	0.95593	0.878211	0.827119	0.779449	0.739653	0.696462	0.661934	0.591685	0.534116	0.501551	0.46898	0.434474	0.4202
	2.55189	1.44737	1.47362	1.49605	1.53422	1.62525	1.64828	1.70333	2.03627	2.57226	2.55189	1.95333	1.38282	1.15826	1.17948	1.16218	1.08326	1.03703	0.9472	0.901263	0.83987	0.800762	0.741312	0.665691	0.583892	0.557044	0.53895	0.512185	0.474322	0.454978	0.46104
	1.09963	1.20484	1.16539	1.32139	1.40906	1.46183	1.53074	1.64843	2.03489	2.57791	2.68486	2.269	1.83705	1.61872	1.57021	1.3804	1.23977	1.14764	1.03509	0.93612	0.833854	0.710603	0.635867	0.566705	0.519798	0.47341	0.432316	0.378647	0.333674	0.284835	0.256643
	1.44806	1.41986	1.36327	1.31091	1.25626	1.20774	1.20028	1.21721	1.35162	1.65186	2.03511	1.88261	1.52678	1.26745	1.10263	1.00557	0.918716	0.893061	0.852865	0.833865	0.799276	0.734089	0.695134	0.714452	0.73516	0.746909	0.725896	0.733869	0.780163	0.841346	0.878106
	1.60577	1.46025	1.32263	1.39935	1.38306	1.36091	1.49103	1.50277	1.69481	2.21459	2.32438	1.98965	1.72689	1.46665	1.30154	1.08257	0.943416	0.901126	0.805333	0.729438	0.683409	0.699736	0.718278	0.705484	0.684055	0.631922	0.580872	0.592971	0.645591	0.676518	0.686874
	1.56906	1.43094	1.43252	1.44849	1.43923	1.47874	1.51652	1.4971	1.8407	2.5404	2.78062	2.42181	1.89332	1.52798	1.27215	1.09589	1.02206	0.971564	0.86926	0.800305	0.75168	0.672637	0.59764	0.539374	0.545366	0.524824	0.466134	0.445248	0.46197	0.497999	0.510471
	0.974477	0.91025	0.868322	0.841751	0.84579	0.922874	1.00686	1.06307	1.25611	1.80234	2.05967	1.9497	1.60041	1.34258	1.15561	1.06132	0.993374	0.960456	0.937607	0.845885	0.831604	0.825334	0.793993	0.826823	0.846416	0.80681	0.78118	0.766305	0.807979	0.81214	0.791863
	2.3592	1.51822	1.6562	1.54992	1.57142	1.63645	1.6517	1.76747	1.93878	2.42991	2.3592	1.81061	1.40993	1.14095	1.01832	0.865101	0.826184	0.821271	0.845888	0.875873	0.860072	0.872596	0.841213	0.749893	0.716785	0.686413	0.593608	0.587103	0.626419	0.643802	0.610503
	1.80396	1.66904	1.39879	1.42592	1.49594	1.54998	1.59761	1.64562	1.77934	2.10432	2.2176	1.85085	1.48371	1.26302	1.14389	1.00701	0.923861	0.894326	0.843857	0.814447	0.754017	0.735597	0.700373	0.656815	0.634165	0.598701	0.549489	0.518345	0.467486	0.456117	0.454445
	1.00886	1.13301	1.11183	1.06798	1.03319	1.08505	1.22444	1.29986	1.48585	1.96819	2.31478	2.2272	2.00718	1.81122	1.62245	1.46313	1.29375	1.21419	1.10201	0.984884	0.867421	0.795505	0.685098	0.576897	0.543023	0.514785	0.490274	0.466562	0.447911	0.430551	0.408875
	0.730819	0.823984	0.932469	0.947647	0.954706	1.05371	1.24133	1.49873	1.82292	2.31403	2.73964	2.30042	1.85164	1.43364	1.17297	1.132	1.03958	0.984661	0.909384	0.84446	0.841242	0.829467	0.788608	0.722264	0.658591	0.572914	0.529387	0.521454	0.473708	0.472206	0.470885
	1.92525	1.81725	1.45291	1.37736	1.48587	1.72147	1.84613	1.94517	2.18742	2.80391	3.13117	2.53247	1.89978	1.58122	1.33047	1.12862	1.01377	0.974199	0.950997	0.834347	0.765108	0.729934	0.648937	0.573082	0.512525	0.447687	0.369809	0.336648	0.304291	0.268472	0.242497
	0.679151	0.679439	0.698891	0.867829	0.943582	1.01235	1.10682	1.1823	1.48288	2.09981	3.05979	2.99281	2.32765	1.74954	1.41078	1.1403	1.00323	0.945948	0.86303	0.808947	0.775766	0.75941	0.713331	0.658563	0.611272	0.564311	0.500362	0.441345	0.388583	0.377004	0.354888
	1.62645	1.40006	1.35733	1.50046	1.56535	1.62557	1.64021	1.64228	1.95739	2.7661	3.43659	3.08381	2.30706	1.99886	1.63995	1.35897	1.15656	1.02751	0.846772	0.727544	0.675451	0.597087	0.545255	0.463738	0.388866	0.351014	0.364886	0.313936	0.306226	0.288235	0.275422
	1.02116	0.969165	0.793033	0.720274	0.743724	0.739449	0.866559	1.09392	1.685	2.65599	2.93876	2.45446	1.82596	1.41701	1.20522	1.0669	0.977539	0.948981	0.88244	0.794083	0.76315	0.715724	0.638019	0.604086	0.585406	0.659063	0.715427	0.710745	0.7296	0.720251	0.71543
	0.652767	0.596256	0.679168	0.764207	0.772714	0.893207	0.948402	1.11622	1.44277	1.89032	1.84021	1.56695	1.3322	1.33262	1.24379	1.09335	1.02187	0.99872	0.92885	0.827669	0.80376	0.738162	0.729278	0.778997	0.816108	0.812539	0.841747	0.939559	0.955462	0.959716	0.979912
	2.2598	2.07022	1.85062	1.74929	1.65207	1.50535	1.57265	1.76781	2.14685	2.55178	2.49339	1.991	1.52727	1.45288	1.37855	1.24862	1.15086	1.08692	1.00859	0.873988	0.767698	0.683237	0.630295	0.582139	0.547448	0.523115	0.516551	0.512755	0.487211	0.476011	0.488028
	1.57421	1.31913	1.32344	1.2824	1.31548	1.39768	1.3768	1.65361	2.40821	2.92009	2.62202	2.10145	1.64338	1.44589	1.34686	1.24758	1.13362	1.14183	1.02765	0.902895	0.824465	0.72547	0.649436	0.551432	0.495175	0.453585	0.435072	0.465984	0.481565	0.49656	0.510009
	0.641521	0.714335	0.845379	0.82869	0.784782	0.814707	0.935731	1.18102	1.69429	2.64605	2.70528	2.29632	1.96599	1.63051	1.3362	1.13929	1.02898	0.988275	0.909815	0.832681	0.759378	0.707015	0.675091	0.678564	0.68371	0.718015	0.688392	0.605919	0.570636	0.571729	0.571754
	2.18208	2.20231	1.99548	1.91875	1.87095	1.8162	1.87506	1.97824	2.2702	2.85317	2.53075	1.85227	1.43849	1.33116	1.21383	1.07899	1.0246	0.988707	0.90789	0.81036	0.683268	0.603391	0.574597	0.547762	0.505475	0.462342	0.420054	0.466851	0.540333	0.507469	0.494446
	1.12848	1.11477	1.03933	1.15177	1.26117	1.3696	1.39002	1.44367	1.75418	2.364	2.32377	1.96476	1.63553	1.44009	1.30363	1.16011	1.0507	1.02286	0.94891	0.827252	0.748932	0.714541	0.684024	0.674948	0.65735	0.654807	0.622309	0.641527	0.636516	0.604416	0.616938
	1.19503	1.15548	1.07934	1.07315	1.10529	1.29188	1.43076	1.4502	1.61752	2.22177	2.29957	1.90524	1.61046	1.38747	1.18758	1.04535	1.00596	1.0068	0.961296	0.90868	0.871035	0.779104	0.720097	0.700245	0.683486	0.643332	0.600943	0.588024	0.552703	0.496494	0.468301
	1.28563	1.2077	1.25189	1.36149	1.33727	1.21058	1.3095	1.50803	2.0411	2.53133	2.48206	2.10505	1.65513	1.42302	1.26305	1.12731	0.975134	0.890019	0.799782	0.751086	0.724836	0.666212	0.629856	0.563307	0.558014	0.601959	0.622409	0.617948	0.645928	0.674193	0.67609
	1.41828	1.87724	2.07115	2.22832	2.18428	2.21342	2.01083	2.01662	2.10616	2.68036	2.60269	1.92407	1.5199	1.25164	0.979467	0.794608	0.76038	0.799325	0.816335	0.819846	0.77053	0.763626	0.734023	0.678014	0.61429	0.547468	0.546873	0.546512	0.592899	0.589703	0.58294
	1.69991	1.84935	1.73664	1.60692	1.62109	1.78246	1.96084	2.09485	2.52493	3.23588	3.22127	2.62801	1.9053	1.42736	1.1298	0.977322	0.836192	0.808575	0.701541	0.600316	0.5846	0.544422	0.437558	0.36841	0.374617	0.423654	0.468894	0.48091	0.497992	0.588807	0.681874
	2.11403	2.07788	1.84209	1.70522	1.62618	1.56293	1.55154	1.71539	2.00405	2.48391	2.28181	2.03886	1.74464	1.47213	1.24908	1.12374	0.990517	0.91247	0.801081	0.749218	0.699455	0.637337	0.575785	0.561477	0.548845	0.508791	0.498508	0.479249	0.497155	0.488627	0.479814
	1.89626	1.47955	1.21061	1.02179	1.02345	1.23771	1.48064	1.53061	1.85809	2.32226	2.27115	1.8437	1.40646	1.06368	0.86376	0.77458	0.734511	0.6957	0.627565	0.632938	0.613129	0.619351	0.639269	0.707964	0.69911	0.764015	0.832961	0.902588	0.959833	1.00129	1.02382
	1.56335	1.42819	1.17609	1.1462	1.14394	1.14616	1.24071	1.44252	2.01299	2.99422	3.08957	2.47596	1.96142	1.57883	1.30868	1.13404	1.00066	0.931032	0.879674	0.810172	0.758275	0.690912	0.627099	0.573051	0.522721	0.468053	0.444772	0.456487	0.433897	0.447233	0.451703
	1.47911	1.32601	1.44372	1.3769	1.40425	1.58393	1.76818	1.82411	2.29713	2.80538	2.53975	2.07549	1.68838	1.40254	1.2536	1.16377	1.11738	1.05819	0.971077	0.85704	0.761848	0.738533	0.672563	0.612279	0.571994	0.533845	0.49716	0.487541	0.444282	0.460225	0.476815
	0.519298	0.5437	0.565323	0.605275	0.572341	0.557211	0.736678	0.975884	1.57945	2.4651	2.53314	2.11053	1.71033	1.50073	1.46081	1.27696	1.14638	1.11054	1.08551	1.03257	0.968285	0.907197	0.792401	0.716782	0.696218	0.654535	0.660439	0.629505	0.575116	0.555138	0.536579
	1.23159	1.16969	1.06129	1.19488	1.24679	1.26939	1.57943	1.90403	2.25	2.67778	2.24818	1.70119	1.53364	1.37788	1.18617	1.04938	0.935109	0.880195	0.779294	0.752702	0.75789	0.791835	0.788176	0.745236	0.731163	0.694316	0.669485	0.650095	0.619374	0.657341	0.658325
	2.0089	1.89675	1.76643	1.63356	1.67953	1.73175	1.71312	1.79956	1.95793	2.30288	2.39831	2.07773	1.62459	1.3099	1.10195	0.989641	0.913632	0.901615	0.828661	0.818144	0.764189	0.727454	0.667698	0.608222	0.580015	0.545775	0.563313	0.559433	0.522301	0.459878	0.434198
	1.46146	1.42496	1.41672	1.48136	1.52148	1.53746	1.59475	1.74005	2.01022	2.64592	2.47021	1.9618	1.6358	1.38004	1.19269	1.01833	0.902709	0.866227	0.793918	0.7229	0.652181	0.615298	0.607976	0.602066	0.599958	0.607216	0.64424	0.637134	0.631529	0.595591	0.588834
	1.04168	1.00308	1.07983	1.01348	1.00643	1.0447	1.11993	1.4083	2.12016	2.99587	3.10459	2.52387	2.03356	1.78693	1.60305	1.32577	1.12279	1.04606	0.969398	0.857432	0.762732	0.683206	0.57663	0.506601	0.465267	0.449298	0.451024	0.459754	0.417159	0.351924	0.328868
	1.89294	1.48117	1.27484	1.32468	1.40834	1.41588	1.49664	1.80977	2.41783	3.18516	2.99309	2.23034	1.74595	1.39365	1.17687	1.0365	0.989497	0.958917	0.905784	0.796846	0.729593	0.703589	0.647063	0.579487	0.548509	0.52456	0.507224	0.498454	0.455923	0.422524	0.427233
	1.25472	1.3033	1.30108	1.39905	1.40525	1.35359	1.33568	1.41917	1.69066	2.21148	2.2624	1.9588	1.63382	1.40572	1.28088	1.10242	1.0132	0.990385	0.96064	0.89894	0.874954	0.829201	0.760691	0.686343	0.668675	0.649348	0.610129	0.576406	0.577439	0.557329	0.549853
	1.56039	1.68639	1.6266	1.68452	1.64789	1.55966	1.39452	1.4089	1.57077	2.08893	2.41941	2.20775	1.95738	1.68155	1.47029	1.19485	1.10421	1.05546	0.945891	0.837336	0.711702	0.639395	0.610536	0.608073	0.558071	0.513014	0.476772	0.461611	0.498965	0.506655	0.497747
	1.33001	1.31074	1.33496	1.39765	1.36434	1.26681	1.26966	1.43663	1.72826	2.2954	2.2198	1.78317	1.46663	1.31844	1.19584	1.07892	0.969277	0.90691	0.85242	0.789165	0.703173	0.619925	0.570183	0.530836	0.53195	0.537652	0.510977	0.488493	0.512075	0.540614	0.569113
	1.98257	1.95021	1.81999	1.87268	1.97213	1.99839	1.95589	2.10696	2.43016	2.73728	2.46098	2.07682	1.63949	1.32087	1.14121	0.969005	0.8664	0.826638	0.778689	0.701404	0.682341	0.647139	0.567261	0.534044	0.489269	0.421294	0.433464	0.424663	0.419771	0.419136	0.433142
	1.51611	1.41865	1.31885	1.30058	1.30744	1.207	1.14457	1.21438	1.59479	2.34189	2.42502	2.12012	1.78664	1.48324	1.26809	1.15551	1.06774	1.01969	0.906476	0.751068	0.680419	0.686808	0.647433	0.631583	0.634179	0.651943	0.627264	0.601863	0.599104	0.604019	0.598337
	1.52175	1.5423	1.53602	1.49062	1.52744	1.42489	1.40572	1.36344	1.58413	1.73104	1.52175	1.36709	1.29239	1.25231	1.16069	1.06708	1.03655	1.06156	1.14127	1.23143	1.17611	1.07857	1.00082	0.931665	0.84695	0.780751	0.663139	0.603288	0.540067	0.508833	0.498489
	1.3191	1.28176	1.44176	1.49723	1.42753	1.39218	1.26738	1.3442	1.54759	1.91569	1.84008	1.55371	1.33999	1.11764	0.998722	0.937043	0.912784	0.883138	0.876194	0.822398	0.803815	0.775279	0.78904	0.847858	0.824761	0.802397	0.812959	0.855755	0.851671	0.825184	0.849787
	1.71034	1.67091	1.71147	1.78698	1.76614	1.59986	1.60202	1.83826	2.37535	3.0275	2.9666	2.3687	1.95359	1.64037	1.3666	1.17159	0.984969	0.866285	0.794798	0.755318	0.700296	0.663027	0.630637	0.635128	0.558892	0.492747	0.406756	0.402655	0.409311	0.351166	0.322693
	1.55574	1.51518	1.40164	1.22642	1.09011	0.992217	1.0127	1.13652	1.44689	2.11429	2.26458	1.92462	1.61989	1.40278	1.24682	1.12902	0.989492	0.934975	0.806842	0.738207	0.723234	0.746696	0.754327	0.717633	0.680602	0.68969	0.721481	0.724095	0.674025	0.67864	0.694696
	0.658945	0.768723	0.946512	1.12599	1.17303	1.22171	1.5788	1.89691	2.28683	3.02876	3.121	2.61105	2.01155	1.68489	1.45815	1.26315	1.07075	1.01205	0.9211	0.782403	0.683624	0.605742	0.556836	0.48892	0.435754	0.41577	0.434424	0.503023	0.543305	0.496932	0.481423
	0.909232	1.06749	1.32426	1.29309	1.33536	1.32367	1.41976	1.51063	1.715	1.80491	1.4756	1.2631	1.11406	0.982785	0.924105	0.906741	0.907083	0.909364	0.897578	0.909094	0.929682	0.955264	0.945741	0.913214	0.873241	0.899262	0.905263	0.853041	0.83499	0.808312	0.792965
	0.81189	0.746298	0.651312	0.669543	0.665507	0.801389	0.884965	1.11807	1.70382	2.53512	2.59644	2.0061	1.54236	1.30326	1.1835	1.16203	1.12389	1.06075	0.955196	0.8445	0.796827	0.786255	0.722121	0.673925	0.645173	0.647343	0.650885	0.658877	0.723225	0.799891	0.81074
	1.7055	1.93361	2.00546	1.87307	1.81585	1.77573	1.71328	1.64302	1.8198	2.17201	2.08789	1.78537	1.47092	1.25791	1.07618	0.94231	0.818417	0.755538	0.68929	0.654545	0.61174	0.624813	0.671565	0.687768	0.671077	0.635658	0.605105	0.582761	0.588805	0.586588	0.607314
	0.994282	0.917716	0.87617	0.920947	1.03327	1.05928	1.003	1.14558	1.40278	2.02735	2.36109	2.22472	2.00149	1.72969	1.47791	1.30897	1.138	1.06959	0.984646	0.908555	0.853085	0.845352	0.801563	0.720694	0.66499	0.619593	0.587077	0.533093	0.511664	0.556252	0.560565
	1.93025	0.992902	0.920718	1.05712	1.16894	1.29125	1.25132	1.21365	1.41918	1.82218	1.93025	1.63773	1.33752	1.11994	1.00234	0.921697	0.882568	0.858618	0.782105	0.795905	0.764933	0.796823	0.835457	0.846763	0.87026	0.897189	0.90305	0.897998	0.9242	0.92159	0.909431
	0.591693	0.578718	0.623526	0.658737	0.696805	0.728019	0.848585	0.970059	1.35765	2.0047	2.30458	1.97018	1.5913	1.37465	1.22988	1.06618	0.991246	0.9676	0.909955	0.873355	0.859312	0.840304	0.870551	0.916121	0.948996	0.877301	0.762188	0.743736	0.741616	0.737436	0.735194
	1.18451	1.10211	1.09135	1.18446	1.23697	1.36419	1.4868	1.64019	1.85291	2.2005	2.3356	2.14491	1.88569	1.57367	1.31526	1.18099	1.08637	1.03452	0.942616	0.857567	0.761126	0.692092	0.645714	0.621238	0.609558	0.618773	0.59548	0.561725	0.568475	0.585399	0.600685
	0.954107	0.920976	0.927981	1.09498	1.13758	1.28436	1.28649	1.31738	1.58718	2.19354	2.55439	2.11787	1.93385	1.70948	1.47249	1.28982	1.09597	1.02307	0.933068	0.883306	0.836673	0.771965	0.710551	0.653973	0.6309	0.650741	0.599363	0.557	0.492851	0.466248	0.453465
	2.58259	2.58762	2.50853	2.48694	2.44322	2.40046	2.2482	2.27398	2.71031	3.21832	2.98321	2.40896	1.87722	1.5438	1.34731	1.11614	1.00345	0.960631	0.823569	0.70111	0.643354	0.566585	0.494439	0.442224	0.40104	0.351457	0.338114	0.326344	0.307553	0.266643	0.242174
	0.693766	0.686315	0.688564	0.701164	0.70582	0.827936	0.95268	1.07808	1.32161	1.80329	2.07901	1.97818	1.80491	1.59343	1.36918	1.23375	1.16204	1.10818	1.03589	1.0135	1.01009	0.97172	0.905136	0.838115	0.826768	0.746194	0.654528	0.663727	0.59503	0.501141	0.458351
	1.76848	1.77425	1.89802	1.95256	1.9437	1.80959	1.72049	1.76119	1.95797	2.43885	2.56167	2.1992	2.00615	1.72548	1.42112	1.13632	1.03313	0.983432	0.885247	0.79768	0.750748	0.678957	0.609772	0.531561	0.470856	0.446103	0.425782	0.419502	0.411206	0.386672	0.375128
	1.02292	0.772816	0.670514	0.746688	0.805598	0.866681	0.929793	1.0667	1.68468	3.17918	3.38184	2.59616	2.13546	1.91581	1.65479	1.35722	1.13342	1.05843	0.971719	0.864473	0.759037	0.674047	0.643598	0.611355	0.588929	0.541835	0.463062	0.448785	0.4276	0.400984	0.385959
	1.42822	1.28416	1.15655	1.17463	1.21382	1.1778	1.13202	1.18401	1.45176	2.12718	2.54367	2.3684	2.06081	1.79118	1.53428	1.42219	1.29066	1.18821	1.05918	0.933207	0.835571	0.731407	0.652105	0.653669	0.660189	0.631498	0.563658	0.485856	0.408923	0.345427	0.311364
	2.29692	2.1247	2.04237	1.96886	1.90068	1.8557	1.8018	1.83825	2.02534	2.38484	2.53612	2.30876	1.90228	1.57866	1.40795	1.23399	1.07676	1.02948	0.944385	0.861562	0.772964	0.722785	0.625029	0.584551	0.559113	0.481461	0.416584	0.397896	0.362189	0.339886	0.316826
	1.84837	1.69141	1.74129	1.86091	1.82949	1.84656	1.79946	1.86808	2.08219	2.43437	2.2903	1.92126	1.52518	1.27529	1.16105	1.08159	1.04337	1.00542	0.975772	0.904691	0.791338	0.709537	0.635913	0.582214	0.575373	0.551783	0.50335	0.459675	0.443478	0.445586	0.454309
	1.03117	0.987712	1.10402	1.22246	1.20868	1.19511	1.23229	1.3634	1.74648	2.33814	2.57019	2.49975	2.24525	1.86587	1.66241	1.43818	1.23961	1.13628	1.01371	0.911751	0.809126	0.708195	0.60424	0.527054	0.491469	0.455462	0.441384	0.434736	0.432699	0.472225	0.517898
	1.62424	1.55922	1.67116	1.7271	1.76252	1.78734	1.80424	1.87763	2.11993	2.31179	2.19151	2.03156	1.75312	1.48935	1.26144	1.10329	0.993242	0.946065	0.863577	0.782001	0.698832	0.663109	0.625896	0.62399	0.604224	0.581219	0.578056	0.586106	0.593679	0.595179	0.604921
	1.22558	1.41974	1.50399	1.47761	1.48479	1.34272	1.2537	1.27661	1.5338	1.89678	1.7944	1.62462	1.4081	1.20546	1.08755	0.942447	0.871108	0.862284	0.803912	0.745249	0.759895	0.765333	0.755079	0.762252	0.784616	0.794474	0.819788	0.838652	0.812591	0.835404	0.837659
	0.989701	1.22135	1.47982	1.43421	1.45584	1.45316	1.55267	1.84977	2.20246	2.59573	2.67968	2.49169	2.06348	1.77292	1.50171	1.27056	1.10444	1.00677	0.88299	0.751269	0.676649	0.610152	0.569824	0.498663	0.456971	0.481988	0.441423	0.455679	0.486039	0.445717	0.455643
	1.93655	1.88903	1.92657	1.8104	1.82553	1.91501	1.95763	1.9607	2.26445	2.77082	2.77449	2.62987	2.29094	1.81568	1.43842	1.17292	1.04144	0.966768	0.871859	0.795586	0.772795	0.670982	0.581833	0.501223	0.445548	0.409894	0.377309	0.324875	0.273605	0.232221	0.207707
	1.24451	1.264	1.24051	1.22231	1.22108	1.19378	1.20354	1.23871	1.34505	1.66103	1.95516	2.05356	1.91229	1.68109	1.41556	1.16988	1.06183	0.981363	0.92324	0.921236	0.883006	0.823634	0.787368	0.739005	0.690926	0.652339	0.57583	0.560242	0.576529	0.557095	0.537749
	1.59663	1.48913	1.43467	1.50136	1.49379	1.6217	1.80128	1.88027	2.1206	2.69737	2.75698	2.33078	1.90894	1.57009	1.31105	1.15875	1.07645	1.03987	0.921759	0.804954	0.718663	0.660867	0.628477	0.579396	0.521119	0.451982	0.438478	0.424402	0.394551	0.37514	0.374767
	1.37581	1.50533	1.3064	1.32212	1.422	1.55874	1.52107	1.70777	1.93348	2.33342	2.48915	2.4017	2.01677	1.64876	1.37023	1.17648	1.0027	0.951561	0.872701	0.774641	0.738386	0.69532	0.68729	0.636665	0.57201	0.53961	0.514239	0.488454	0.494109	0.506876	0.509096
	2.50468	1.17204	1.16653	1.16453	1.18183	1.27319	1.54964	1.81542	2.1079	2.46446	2.50468	2.24338	2.01107	1.76289	1.56995	1.43915	1.2395	1.10465	0.962416	0.843044	0.795988	0.707516	0.635193	0.581906	0.555969	0.50921	0.450045	0.418102	0.398349	0.378609	0.364091
	1.81609	1.60395	1.42411	1.33131	1.39044	1.50103	1.49477	1.61016	1.94444	2.54981	2.62399	2.44516	2.04113	1.59578	1.34865	1.22567	1.2004	1.1249	1.01633	0.94803	0.822029	0.711386	0.624125	0.583163	0.547175	0.47645	0.41478	0.391086	0.377219	0.359119	0.352546
	1.79944	1.57238	1.48401	1.50896	1.5228	1.56419	1.58565	1.63881	1.85955	2.22798	2.29566	2.10852	1.77873	1.51077	1.30174	1.20213	1.10408	1.07387	1.00417	0.900283	0.801586	0.719563	0.637483	0.550683	0.490087	0.451601	0.422157	0.401562	0.340515	0.297316	0.284165
siAKAP6	1.26589	1.26589	0.818327	0.866278	0.866545	0.921939	1.10138	1.10183	1.018	1.06727	1.26589	1.25557	1.1703	1.08883	1.08901	1.0026	0.986726	0.994336	1.02941	1.01847	0.96422	0.907788	0.92503	0.931131	0.943484	0.932007	0.966952	0.990255	0.97532	0.962541	0.944358
	0.907045	1.00077	1.11871	1.0704	1.07256	1.12098	1.22181	1.25992	1.36745	1.39193	1.38669	1.29467	1.20297	1.08269	1.02025	0.96802	0.930058	0.898081	0.891529	0.945263	0.939387	0.90868	0.898765	0.87534	0.889841	0.894074	0.889376	0.900708	0.907042	0.899209	0.913402
	1.66274	1.58815	1.51085	1.43652	1.45041	1.44696	1.42629	1.44761	1.53042	1.64811	1.72943	1.64985	1.44711	1.25575	1.14905	0.989854	0.94912	0.8648	0.86633	0.816001	0.776059	0.806658	0.788532	0.746022	0.74865	0.752297	0.730525	0.740313	0.740423	0.714245	0.687105
	0.928282	0.747204	0.725597	0.731892	0.742875	0.816783	0.839446	0.722951	0.884518	1.17155	1.10795	0.924086	0.867956	0.877349	0.892873	0.925416	0.974019	0.989571	0.995619	0.951867	0.962718	0.986646	0.97172	0.997106	0.966316	0.968272	1.00894	1.05403	1.12166	1.26307	1.30802
	0.873084	0.837813	0.871263	0.975544	0.904505	0.961428	0.958052	0.993669	1.10639	1.26447	1.28207	1.1422	1.10413	1.06582	1.02215	0.976264	0.968115	1.00859	1.0097	1.00979	1.01435	1.01276	0.997166	0.972167	0.962875	0.980034	0.965282	0.958552	0.943604	0.945136	0.921961
	0.846557	0.857845	0.938834	0.908696	0.821414	0.853091	0.966433	0.972055	1.19686	1.32666	1.52567	1.46782	1.41125	1.4101	1.38768	1.35741	1.32945	1.1486	1.06856	1.00897	0.974828	0.909617	0.883735	0.849224	0.833644	0.78626	0.788273	0.794277	0.769265	0.73156	0.721124
	1.24592	1.20565	1.20177	1.21497	1.19093	1.15473	1.19036	1.08168	1.08321	1.21063	1.18832	1.02256	0.963167	0.884159	0.897619	0.950461	0.92533	0.885051	0.854505	0.846906	0.856675	0.880179	0.963326	1.024	0.991425	0.948175	0.965003	0.990402	1.01812	1.03108	1.01922
	1.22403	1.23466	1.22686	1.22063	1.22046	1.27265	1.14468	1.1193	1.15557	1.32885	1.38897	1.1748	1.00816	0.974622	0.995103	0.985046	0.979235	0.942741	0.951368	0.970508	0.885902	0.843617	0.791964	0.786681	0.82751	0.877086	0.90126	0.992089	0.997639	1.0621	1.11095
	1.11556	1.11556	1.10564	1.15538	1.23231	1.234	1.26626	1.17804	1.26021	1.26883	1.11556	1.01606	1.01578	1.05386	1.09421	1.07616	1.05374	1.00498	0.994864	0.977929	0.9543	0.942417	0.93601	0.940658	0.924934	0.923963	0.926785	0.923765	0.946103	0.921663	0.90936
	1.34891	1.40204	1.27861	1.2449	1.2584	1.21503	1.19419	1.18212	1.31099	1.53976	1.62898	1.31021	1.26815	1.20535	1.18872	1.16235	1.11396	0.980145	0.948874	0.949066	0.931216	0.894139	0.863985	0.852802	0.831221	0.8204	0.85317	0.803786	0.780258	0.780719	0.771143
	0.92677	0.800781	0.898347	0.836291	0.963735	0.894841	0.873198	0.943384	1.13007	1.65132	1.84987	1.56961	1.44513	1.31136	1.23521	1.13039	1.07484	0.976368	0.961031	1.02279	0.99011	0.966118	0.88429	0.84085	0.822084	0.778365	0.736337	0.760895	0.819967	0.883264	0.879244
	0.903434	1.26741	1.21167	1.17037	1.12172	1.04268	1.04795	1.05254	1.13377	1.22161	1.23144	1.16773	1.1445	1.03729	1.03364	1.03897	1.02019	0.962181	0.924999	0.935622	0.939732	0.973069	1.02216	0.966242	0.96735	0.9754	0.968919	0.922307	0.907568	0.893524	0.880734
	1.53991	0.897081	0.843193	0.773605	0.804022	0.833568	0.854783	1.05087	1.35591	1.63267	1.53991	1.4707	1.45912	1.51782	1.46205	1.22872	1.13858	0.944054	0.90739	0.856084	0.828564	0.773792	0.764512	0.803391	0.831882	0.838574	0.890053	0.893816	0.900183	0.878706	0.900327
	0.427926	0.355636	0.315793	0.395936	0.444715	0.54278	0.81732	0.994285	1.13787	1.57572	1.78487	1.39235	1.21839	1.14559	1.10487	1.07759	0.991164	0.936016	1.00495	1.00967	1.05901	1.00971	0.937758	0.957435	0.907463	0.906444	0.931778	0.966371	0.944656	0.981939	1.00254
	2.21653	0.825127	0.712252	0.977437	0.9618	0.874279	0.699717	0.678434	0.759683	1.60037	2.21653	1.79876	1.78879	1.9045	1.70634	1.57957	1.4755	1.38511	1.17122	1.09628	1.06324	0.825041	0.691004	0.676842	0.644469	0.676561	0.65297	0.675951	0.546736	0.567756	0.538393
	2.1136	0.72268	0.557155	0.956494	1.02891	1.15207	1.23182	1.29029	1.38059	1.75006	2.1136	1.75004	1.64453	1.3932	1.14637	1.17305	1.15009	1.10997	1.05748	0.896254	0.835538	0.767749	0.763414	0.752269	0.783729	0.754894	0.786336	0.823931	0.760177	0.690045	0.669497
	0.370714	0.467648	0.437767	0.505421	0.484924	0.577466	0.544716	0.56302	0.77354	1.51258	1.61655	0.999671	0.945083	1.00962	0.959869	0.861201	1.00548	1.10002	1.11052	1.06401	1.06008	1.13969	1.19157	1.24434	1.03832	0.973745	1.13161	1.08832	0.942897	0.813914	0.748384
	0.665434	0.529994	0.523044	0.460622	0.469528	0.525612	0.628965	0.794899	0.90156	1.32567	1.54711	1.10067	0.836399	0.862448	0.803666	0.821135	0.763582	0.740573	0.811023	0.83958	0.88615	0.977536	0.99388	1.11519	1.08171	1.13545	1.1442	1.10503	1.18543	1.31519	1.28919
	2.02688	0.9556	0.74785	0.689667	0.677853	0.665248	0.705	0.818889	1.1991	1.76507	2.02688	1.65201	1.34225	1.25137	1.23295	1.16005	1.05931	0.985734	0.922923	0.893711	0.868977	0.870196	0.865005	0.855718	0.910488	0.871294	0.809228	0.831952	0.8451	0.857595	0.859494
	1.55931	0.860907	0.996026	0.968136	0.96836	0.960076	1.05238	1.01215	1.04379	1.35297	1.55931	1.3785	1.44184	1.44587	1.32355	1.20153	1.14455	1.03421	1.00132	1.00329	1.00507	1.02728	0.953828	0.933658	0.895084	0.821225	0.787449	0.775742	0.775592	0.753533	0.689481
	1.33461	0.896554	1.17269	1.12626	1.17669	1.15461	1.18558	1.27941	1.27727	1.37981	1.33461	1.11542	1.08577	0.976127	0.933436	0.934875	0.921562	0.884086	0.925984	0.927595	0.948335	0.969415	0.943433	0.990543	0.963106	0.939679	0.885617	0.83532	0.951488	0.967618	0.999798
	1.262	1.33475	1.26924	1.25495	1.18004	1.21549	1.16025	1.30472	1.71119	1.95328	1.87582	1.56185	1.50931	1.43492	1.32984	1.193	1.12707	0.94469	0.873864	0.810087	0.782618	0.73351	0.712581	0.720728	0.713102	0.739717	0.727539	0.718299	0.715059	0.684763	0.651707
	1.19058	1.36376	1.19146	1.01295	0.909878	1.02056	1.21329	1.31249	1.3196	1.2975	1.41495	1.31307	1.18021	1.08857	1.0903	1.06002	1.06492	1.0071	0.934699	0.924606	0.923493	0.918119	0.943426	0.92008	0.907831	0.876539	0.864962	0.94417	0.939882	0.816371	0.79582
	1.8116	1.8116	0.645998	0.717146	0.848865	0.946735	0.988921	1.10494	1.30055	1.74179	1.8116	1.40618	1.26469	1.32863	1.29294	1.21782	1.19637	1.11117	1.05888	0.963077	0.972024	0.976423	0.913295	0.842882	0.835811	0.862357	0.85719	0.745203	0.726717	0.749508	0.773819
	1.42521	1.35834	1.46428	1.46962	1.45927	1.4516	1.41324	1.27808	1.27591	1.52949	1.9627	1.80194	1.54031	1.28628	1.1765	1.05641	1.02993	0.978118	0.930928	0.842752	0.836245	0.856017	0.818774	0.72688	0.715285	0.742149	0.725962	0.686862	0.700061	0.690452	0.692852
	0.8112	0.839232	0.911494	0.972498	0.752031	0.712636	0.654279	0.745412	1.02798	1.58115	1.48442	1.23197	1.07989	1.05863	1.0257	1.01836	0.956004	0.910146	0.963406	1.01348	1.02618	0.96451	0.961652	1.01675	1.0659	1.03631	0.979783	0.939222	0.919773	0.913397	0.923154
	1.13211	1.27944	1.14179	1.14717	1.22303	1.23886	1.25797	1.36821	1.70434	1.91866	1.99561	1.87419	1.77441	1.55169	1.57212	1.45411	1.30953	1.12166	1.0588	0.880063	0.808753	0.696865	0.657779	0.607538	0.651453	0.66898	0.623385	0.592266	0.572377	0.545372	0.563361
	0.490585	0.562034	0.626466	0.681546	0.668815	0.675465	0.64757	0.659004	0.888201	1.29058	1.32283	1.22063	1.21643	1.11745	1.11566	1.08484	1.06442	1.05699	1.03509	1.01136	0.98504	1.03095	0.998002	0.995852	0.979506	0.991814	0.970502	0.964813	0.952667	0.971089	0.969823
	0.449949	0.468822	0.42719	0.431115	0.458556	0.448809	0.526093	0.602014	0.743605	1.15867	1.11623	0.994228	0.969395	1.04707	0.979489	1.01951	0.997855	0.933822	0.933881	0.977462	1.05328	1.12697	1.06953	1.06604	1.03981	1.05045	1.09047	1.13504	1.13845	1.22037	1.23125
	0.204982	0.172903	0.178708	0.19231	0.220125	0.269438	0.441502	0.58505	0.913542	1.35747	1.21434	1.04212	0.921029	0.908843	1.0223	1.24104	1.21868	1.06086	1.02845	1.03336	1.03157	1.04651	1.11627	1.18345	1.19797	1.14466	1.13785	1.05406	1.045	1.03935	1.02869
	0.522956	0.57628	0.616352	0.742498	0.902383	1.04262	1.16962	1.20616	1.32895	1.74967	1.76018	1.40552	1.27507	1.10978	1.1085	1.16189	1.23201	1.30809	1.30532	1.23657	1.07986	0.911336	0.882081	0.871127	0.846023	0.796538	0.785603	0.717346	0.693962	0.685641	0.700896
	0.475184	0.480981	0.457468	0.405735	0.36352	0.332646	0.300357	0.321246	0.474188	0.985003	1.67348	1.59636	1.443	1.43828	1.3885	1.20991	1.12181	1.0864	1.01194	0.994945	1.06849	1.11317	1.06517	1.01246	0.958483	0.923779	0.898102	0.928709	0.991774	0.980697	1.02112
	1.74409	1.71213	1.68336	1.60017	1.57141	1.5541	1.51286	1.51849	1.61823	1.9964	2.27529	2.0658	1.78003	1.53494	1.33137	1.19352	1.09874	1.05383	0.956722	0.892823	0.817836	0.772369	0.692504	0.637663	0.61069	0.545623	0.497391	0.43372	0.378993	0.370872	0.362179
	0.423715	0.482098	0.503576	0.522836	0.503525	0.596689	0.760095	1.05774	1.52103	1.94897	1.94186	1.77575	1.61937	1.42996	1.2272	1.17126	1.13029	1.09125	1.09569	1.05402	1.00505	1.00625	0.907214	0.822596	0.808025	0.779951	0.739894	0.712513	0.701744	0.689102	0.677523
	0.398993	0.4476	0.500276	0.597163	0.668996	0.645155	0.618046	0.743631	1.09416	1.44215	1.49875	1.41931	1.35073	1.31011	1.2215	1.12591	1.09045	1.12791	1.1583	1.11595	1.08581	1.0417	0.981858	0.928014	0.913925	0.956911	0.918788	0.877395	0.821095	0.774237	0.755215
	0.570893	0.602166	0.645928	0.665086	0.669822	0.731171	0.767596	0.840284	1.04206	1.25606	1.44159	1.43148	1.42248	1.39417	1.31798	1.20962	1.12229	1.10767	1.12674	1.1264	1.13341	1.09573	0.982449	0.93213	0.924486	0.891108	0.879096	0.840047	0.795279	0.769532	0.763636
	0.466991	0.482871	0.433754	0.496856	0.524018	0.51886	0.564733	0.658018	0.814887	1.17115	1.35999	1.2286	1.13084	1.2209	1.22426	1.13558	1.06507	1.0282	1.04299	1.03288	1.04113	0.976669	0.968565	1.00541	0.987065	1.00561	1.02233	1.01503	0.994292	0.983435	0.977576
	1.72215	1.72215	0.657564	0.595284	0.590354	0.695844	0.833876	0.973268	1.26006	1.72149	1.72215	1.63593	1.46257	1.37428	1.28343	1.18034	1.10234	1.06014	1.01121	1.0077	0.957585	0.924293	0.930709	0.978991	0.968446	0.928347	0.84806	0.748683	0.679472	0.643069	0.61182
	0.862732	0.715318	0.645917	0.71336	0.744512	0.733524	0.83589	1.01495	1.15405	1.29043	1.21535	1.05486	0.952847	0.930958	0.886492	0.850749	0.831257	0.848131	0.848832	0.840521	0.84886	0.848018	0.802886	0.824326	0.925076	1.01458	1.11487	1.23867	1.30263	1.30225	1.30911
	1.34277	1.54195	1.72295	1.69581	1.59424	1.40274	1.4831	1.59184	1.86623	2.11404	2.015	1.70857	1.47975	1.30793	1.12801	1.02685	0.952495	0.907945	0.802902	0.773265	0.76484	0.780985	0.756384	0.695793	0.733567	0.776424	0.73519	0.679398	0.644371	0.6248	0.631309
	1.01225	1.00782	0.986919	0.929189	0.868693	0.776941	0.808104	0.8173	0.974437	1.24514	1.5186	1.33802	1.11228	0.956976	0.953207	1.00077	0.97623	0.954171	0.966471	1.07038	1.16278	1.13946	1.14458	1.04497	0.997381	0.942117	0.882966	0.871455	0.839966	0.82675	0.8258
	0.842212	1.09378	0.98372	1.22217	1.46197	1.59359	1.50786	1.54486	1.83412	2.32158	2.21788	1.76547	1.52526	1.36895	1.17359	1.05832	1.00048	0.958408	0.904907	0.873923	0.848476	0.784912	0.72958	0.70885	0.669012	0.651428	0.69825	0.703786	0.711344	0.670531	0.670958
	0.922752	0.950845	1.04102	1.13454	1.15377	1.12803	1.15254	1.28347	1.44521	1.79095	1.90455	1.71449	1.54175	1.38335	1.2327	1.12873	1.0482	1.01483	0.96611	0.914359	0.902846	0.866518	0.809799	0.784074	0.771731	0.740814	0.687157	0.646846	0.639131	0.642929	0.637291
	0.622683	0.478306	0.55427	0.622618	0.6355	0.59848	0.654551	0.844094	1.26613	1.9393	2.29092	2.11039	1.61164	1.36016	1.25111	1.13766	1.09918	1.07802	1.10651	1.13092	1.06651	1.03249	0.956608	0.866735	0.819944	0.783519	0.705013	0.638893	0.612605	0.602007	0.584035
	0.96931	1.04452	0.846935	0.766498	0.772026	0.842259	0.935102	1.02271	1.20472	1.65103	1.99974	1.94114	1.70109	1.63298	1.5322	1.37847	1.3297	1.28079	1.15349	1.01103	0.911302	0.874964	0.832486	0.771027	0.734144	0.680215	0.663637	0.625319	0.582838	0.535501	0.511922
	0.635269	0.771791	0.800122	0.806096	0.830192	0.901956	0.931275	0.963277	1.24699	1.514	1.55455	1.43129	1.29594	1.37808	1.35801	1.27311	1.13119	1.10096	1.02504	0.952764	0.947702	0.951975	0.875613	0.851894	0.88293	0.933275	0.913351	0.815457	0.752565	0.721763	0.726825
	0.305737	0.364872	0.41882	0.453796	0.39841	0.423757	0.516231	0.669218	0.993974	1.16057	1.08853	1.00934	1.03334	1.08688	1.05566	1.01229	1.02217	1.05412	1.05815	0.952744	0.880347	0.941293	1.05302	1.04781	1.06793	1.21227	1.23645	1.16978	1.07229	1.01429	0.989899
	0.87672	0.894982	0.868974	0.967765	1.04293	1.1362	1.10779	1.12396	1.23642	1.65133	1.89976	1.79309	1.64589	1.50915	1.46398	1.36624	1.28982	1.24384	1.09534	0.967311	0.890018	0.859324	0.81648	0.726748	0.697331	0.676236	0.639895	0.648616	0.643785	0.636135	0.641366
	1.02696	1.09393	1.09249	1.01256	0.981537	0.928176	0.938976	1.0097	1.14953	1.4912	1.75953	1.59844	1.53419	1.48377	1.3837	1.2578	1.10782	1.02489	0.991618	0.957658	0.923661	0.86911	0.800812	0.767575	0.768974	0.762245	0.764843	0.80381	0.827466	0.782426	0.754365
	0.505095	0.440189	0.509654	0.554941	0.567526	0.605416	0.631881	0.693639	0.947133	1.30496	1.41558	1.27389	1.20732	1.13792	1.02741	0.968675	0.922736	0.898379	0.897837	0.995606	1.02627	1.01132	0.968866	0.985415	1.08676	1.11459	1.05684	1.0385	1.03679	1.0018	0.951075
	1.55797	1.46208	1.55941	1.62629	1.68307	1.70284	1.74665	1.84204	1.77232	1.95655	1.95231	1.48345	1.25147	1.18383	1.05828	0.98905	0.94364	0.880124	0.822029	0.834585	0.84323	0.780641	0.680637	0.656334	0.656097	0.677622	0.663979	0.687394	0.776631	0.879727	0.889142
	1.75976	1.63013	1.46729	1.34623	1.31949	1.20701	1.10458	1.17026	1.44687	1.69732	1.67675	1.70669	1.49272	1.29951	1.18733	1.05116	0.911598	0.831485	0.764351	0.756121	0.719247	0.793442	0.842832	0.871327	0.856737	0.80189	0.840059	0.860453	0.806267	0.787093	0.795049
	1.30968	1.48765	1.56758	1.83461	1.87363	1.83683	1.645	1.55097	1.55865	1.44146	1.30968	1.26592	1.2017	1.13518	1.01991	0.915651	0.844105	0.815289	0.754553	0.74118	0.804757	0.829772	0.79637	0.890336	0.936585	0.893294	0.857981	0.880148	0.861301	0.837174	0.832935
	1.3395	1.34493	1.21626	1.04735	0.942766	0.965502	1.24806	1.39518	1.59256	2.18127	2.11884	1.92349	1.76176	1.52683	1.2801	1.1368	0.969227	0.974201	0.928267	0.832397	0.799361	0.72654	0.644932	0.633119	0.655804	0.680262	0.710258	0.736408	0.776949	0.794131	0.782245
	1.46034	1.35234	1.22509	1.3364	1.40899	1.36011	1.34506	1.42585	1.78577	2.24011	2.18115	1.75682	1.46001	1.34998	1.23483	1.14063	1.10736	1.05821	0.931433	0.90238	0.867516	0.790568	0.707618	0.619941	0.578466	0.597962	0.581004	0.547716	0.521272	0.501271	0.474424
	1.07247	1.03965	0.922976	0.897718	0.862407	0.739158	0.668667	0.704021	0.84785	1.15865	1.53795	1.63814	1.49738	1.37514	1.21071	1.10241	1.04953	1.00707	0.953994	0.952702	0.983371	1.00579	1.03965	1.00339	0.922604	0.85156	0.834877	0.860146	0.867879	0.810608	0.769081
	0.806441	0.778336	0.802739	0.885993	0.878205	0.821791	0.876251	0.984097	1.16131	1.56066	1.89954	2.02739	1.70078	1.43381	1.27436	1.09643	0.971507	0.91014	0.888237	0.910042	0.889421	0.857774	0.786327	0.783781	0.762436	0.799225	0.804402	0.790862	0.799882	0.738511	0.718427
	0.756166	0.779737	0.746925	0.795832	0.872631	1.00811	0.985663	1.02933	1.23789	1.58621	1.5457	1.32224	1.25122	1.26813	1.20132	1.16347	1.19198	1.14956	1.05345	0.991375	0.965177	0.930121	0.89662	0.840583	0.828692	0.839465	0.837013	0.841669	0.842483	0.839602	0.835917
	1.41126	1.0206	1.19697	1.14545	1.13364	1.06034	0.99584	1.0863	1.29581	1.56882	1.41126	1.27587	1.102	1.09582	1.1414	1.17491	1.14076	1.13511	1.13218	1.01999	1.00545	1.0057	0.915067	0.854113	0.789326	0.776187	0.801591	0.784223	0.850779	0.926812	0.953917
	1.70366	0.495585	0.666599	0.615796	0.650204	0.79504	0.963019	1.14598	1.35088	1.66682	1.70366	1.49194	1.31715	1.17427	1.05042	0.937683	0.880178	0.852462	0.852536	0.882851	0.920892	0.95518	0.952449	0.965581	0.958948	0.926222	0.916572	0.896489	0.871642	0.911711	0.951093
	0.088409	0.230395	0.517225	0.711411	0.732869	0.718152	0.703374	0.692952	0.761141	0.993488	0.99129	0.785069	0.836635	0.885987	0.941008	1.0152	1.04435	1.02975	1.02046	1.07329	1.10113	1.06394	1.10334	1.09591	1.14897	1.17537	1.15154	1.09874	1.05287	1.00367	0.974063
	1.06165	1.03556	0.916083	0.894929	0.898013	1.12845	1.25086	1.44608	1.79519	2.38512	2.57483	2.04827	1.53775	1.32676	1.16705	1.08798	1.0566	0.99613	0.959296	0.916836	0.872561	0.814503	0.749613	0.751858	0.714981	0.702016	0.67547	0.611007	0.59661	0.586392	0.57425
	0.68225	0.709032	0.861524	0.930226	1.05208	1.23597	1.32561	1.46879	1.61256	1.91938	1.93841	1.49437	1.28013	1.23558	1.09581	1.02788	1.03219	1.04101	1.027	1.06573	1.02112	0.958103	0.887688	0.974968	0.932498	0.791537	0.740321	0.677712	0.637758	0.613976	0.606088
	2.30534	2.24311	2.20159	2.19093	2.01911	1.65755	1.55123	1.57412	1.80198	2.14841	2.21806	1.86531	1.35841	1.10616	0.968293	0.868081	0.851772	0.841907	0.821653	0.821044	0.781093	0.785461	0.790632	0.704054	0.629262	0.617256	0.660195	0.642215	0.582692	0.555837	0.544943
	2.02765	2.02765	1.01086	0.747314	0.72463	0.7245	0.759211	0.856385	1.1691	1.82126	2.02765	1.77718	1.58916	1.47903	1.39163	1.26741	1.20443	1.17591	1.14526	1.06213	0.99301	0.944584	0.875953	0.810923	0.803655	0.783418	0.734153	0.696902	0.623753	0.556511	0.546076
	0.862622	1.03074	1.06791	1.03868	1.0228	0.930601	0.900058	0.871561	1.04646	1.2592	1.28004	1.26546	1.16713	1.04226	0.978027	0.866698	0.849214	0.847938	0.90945	0.970492	0.991876	0.988982	1.02542	1.05531	1.09269	1.08077	1.04722	0.955118	0.893434	0.873726	0.859944
	0.768874	0.978575	1.16143	1.30033	1.25633	1.22207	1.28452	1.51051	1.72506	1.93043	1.8821	1.7168	1.52368	1.41027	1.3134	1.19708	1.03072	0.976078	0.927511	0.910983	0.899752	0.891124	0.787712	0.710714	0.7169	0.714566	0.703042	0.714831	0.667024	0.633213	0.615959
	0.677775	0.600962	0.572185	0.580379	0.614929	0.64865	0.734433	0.80732	0.950339	1.2856	1.57505	1.53978	1.43339	1.39229	1.32252	1.26056	1.21907	1.16762	1.14875	1.10023	1.05559	1.03993	1.00293	0.915791	0.86856	0.821734	0.795696	0.801882	0.791805	0.755869	0.737876
	1.07819	1.06326	1.0842	1.07638	1.0334	1.02056	1.02421	1.118	1.3337	1.66539	1.82471	1.77188	1.49751	1.30834	1.16124	1.04457	1.02697	1.03123	0.992136	0.939558	0.963648	1.00341	0.979911	0.886129	0.854675	0.824584	0.763739	0.730504	0.680885	0.628234	0.600493
	1.84875	1.84875	1.16253	1.19671	1.23002	1.18232	1.09794	1.19924	1.42779	1.79422	1.84875	1.59882	1.39792	1.28514	1.16517	1.01509	0.911737	0.854606	0.814238	0.818471	0.83288	0.833494	0.817869	0.831343	0.795295	0.794471	0.815953	0.857312	0.894979	0.904473	0.880759
	0.536378	0.746155	0.907268	0.896709	0.899979	0.997012	1.18832	1.38144	1.63096	2.41583	2.62018	2.32571	2.00745	1.66812	1.44212	1.2535	1.14886	1.0554	0.926028	0.85477	0.794545	0.766075	0.730489	0.692947	0.626871	0.600459	0.595737	0.584941	0.542734	0.505832	0.494135
	2.24632	2.15753	2.13515	2.0984	2.0941	1.99841	1.82471	1.70226	1.67016	1.69031	1.72886	1.60157	1.40549	1.22266	1.08768	0.95647	0.930351	0.865412	0.809036	0.738695	0.694271	0.683469	0.69945	0.707017	0.684057	0.678835	0.665071	0.690069	0.70106	0.707015	0.71911
	0.747579	0.934891	1.01758	1.02418	0.993853	1.02713	1.06422	1.01347	1.1682	1.5742	1.8683	1.99775	1.77167	1.4908	1.27316	1.15635	1.06223	1.00019	0.910792	0.802801	0.809245	0.850303	0.875453	0.846799	0.847224	0.820584	0.750627	0.735217	0.739442	0.711882	0.701848
	1.19725	0.349454	0.331524	0.487823	0.610109	0.688564	0.694258	0.719939	0.828944	1.08264	1.19725	1.25717	1.12037	1.03972	1.04723	1.01413	1.05946	1.07179	1.00807	1.0401	1.02033	0.979652	0.978858	1.02631	1.03866	1.05616	1.03666	1.00101	1.03364	1.01261	0.998599
	1.19463	1.38663	1.50169	1.4594	1.50923	1.50202	1.43112	1.32177	1.31854	1.55288	1.80649	1.75494	1.67294	1.56463	1.41131	1.23838	1.06933	1.00452	0.912769	0.824683	0.793166	0.754875	0.747553	0.73546	0.734148	0.736261	0.738115	0.687731	0.624745	0.593206	0.581303
	1.26605	1.22615	1.24469	1.21603	1.2536	1.25217	1.16317	1.20428	1.35018	1.53417	1.72497	1.71253	1.49999	1.39544	1.23776	1.05118	0.879604	0.79634	0.74126	0.792447	0.780266	0.786865	0.782435	0.773779	0.790487	0.809978	0.837489	0.820413	0.848306	0.887857	0.913389
	0.983501	0.206151	0.178146	0.316657	0.473264	0.687655	0.747755	0.851357	0.954042	1.0525	0.983501	0.959161	0.9891	1.02164	1.06253	1.08505	1.09514	1.063	1.03526	1.06109	1.07205	1.09348	1.07328	1.02313	0.988154	0.995254	0.983678	1.00952	1.11931	1.09619	1.04757
	0.95598	0.982542	0.964205	0.912719	0.862414	0.871193	0.916866	0.99194	1.03289	1.05466	1.08509	0.964358	0.873569	0.769045	0.766522	0.82756	0.883917	0.881599	0.95936	1.12519	1.30403	1.30257	1.12588	0.967245	0.945463	0.929794	0.983311	1.04899	1.06225	1.01875	0.992693
	0.564218	0.7327	0.813525	0.995764	1.03619	1.15737	1.19413	1.1282	1.12095	1.16541	1.1055	1.07957	1.08336	1.0243	0.933979	0.84841	0.770635	0.751099	0.779209	0.852861	0.952787	1.00794	1.01823	1.03798	1.03711	1.06243	1.00912	1.03417	1.02522	1.00529	1.00785
	1.18441	1.18441	1.08177	1.18486	1.24034	1.09293	0.94788	0.983158	1.09144	1.21494	1.18441	1.03723	0.81711	0.742692	0.704986	0.733139	0.848002	0.88137	0.93422	0.986886	1.03737	1.00608	1.049	1.0727	1.07142	1.05379	1.09605	1.07112	1.02415	1.01241	0.969005
	0.75581	0.631915	0.690602	0.780724	0.745563	0.81142	0.845416	0.918862	1.00524	1.24845	1.41855	1.35943	1.3135	1.2843	1.22608	1.24205	1.22601	1.21656	1.15983	1.03333	0.926168	0.865712	0.916507	0.946723	0.877871	0.860264	0.861307	0.854914	0.902527	0.872714	0.8455
	0.372031	0.52527	0.673215	0.790517	0.804113	0.69903	0.666583	0.769484	1.12059	1.49702	1.74626	1.52927	1.43547	1.24215	1.16808	1.18417	1.18422	1.16064	1.14481	1.07922	1.01782	1.00735	1.03164	1.03482	0.934035	0.850432	0.793569	0.781736	0.742533	0.720637	0.714743
	0.642254	0.884201	0.882693	0.792074	0.811677	0.941599	0.953983	0.948305	1.09187	1.20154	1.29493	1.30025	1.28431	1.22086	1.11193	1.02335	0.991883	0.984544	0.937235	0.931037	0.964536	1.0071	1.04702	1.03284	1.02054	0.971629	0.936349	0.922231	0.850395	0.843571	0.841572
	0.844989	1.05883	0.97821	1.03783	1.07056	1.26425	1.37151	1.30925	1.4596	1.7187	1.6495	1.46713	1.40644	1.29944	1.21883	1.14518	1.09834	1.0927	1.02932	0.922956	0.856887	0.811871	0.813636	0.83432	0.77972	0.715018	0.752055	0.794256	0.816364	0.7909	0.796881
	1.42102	1.39449	1.44209	1.50523	1.58625	1.73483	1.7264	1.70592	1.85587	2.23088	2.36655	2.03699	1.76294	1.57265	1.36159	1.1636	1.02114	0.981203	0.943562	0.860358	0.784865	0.741827	0.715593	0.663377	0.584161	0.53636	0.505612	0.460077	0.468523	0.473359	0.47054
	1.6973	1.56926	1.44593	1.32612	1.29195	1.3287	1.30734	1.36306	1.36682	1.46294	1.53675	1.60224	1.3368	1.15218	1.08298	1.04679	1.03696	1.0197	0.927486	0.8599	0.852357	0.819211	0.820296	0.792391	0.78856	0.789054	0.785743	0.814604	0.859799	0.924468	0.938985
	1.94549	1.94549	1.41565	1.41866	1.40199	1.47347	1.68212	1.94214	2.20369	2.07441	1.94549	1.67224	1.34623	1.23382	1.17232	1.09754	0.974801	0.921562	0.866588	0.78425	0.760079	0.767063	0.727765	0.707026	0.716153	0.693997	0.69814	0.718602	0.73823	0.724	0.710339
	1.60486	0.701677	0.628676	0.668142	0.708718	0.756229	0.844319	0.898081	1.12957	1.4516	1.60486	1.69662	1.71896	1.64625	1.68538	1.55889	1.37427	1.29197	1.21867	1.10974	0.951329	0.834689	0.797856	0.727198	0.665547	0.674667	0.669717	0.698976	0.688882	0.69203	0.702698
	0.731399	0.473544	0.454895	0.523132	0.52341	0.520275	0.597073	0.780831	1.09413	1.56185	1.67745	1.51739	1.45312	1.43888	1.32529	1.01139	0.796234	0.76363	0.801955	0.887132	0.985481	1.00355	1.0601	1.0516	0.984733	0.933916	0.874915	0.84466	0.879229	0.943872	0.948308
	0.116475	0.127975	0.151406	0.17872	0.192882	0.280789	0.358837	0.426295	0.557867	0.782069	0.987343	1.12295	1.13413	1.14087	1.12873	1.0491	0.993158	0.971556	0.924752	0.871588	0.911983	0.976202	1.03009	1.07367	1.12054	1.18175	1.23691	1.27306	1.27248	1.28636	1.27146
	0.291826	0.335956	0.440269	0.479803	0.525677	0.674379	0.955059	1.25561	1.72705	2.07206	1.99536	1.78594	1.58713	1.45784	1.31537	1.16918	1.10149	1.09122	1.05334	0.998407	0.930692	0.875638	0.852366	0.81234	0.817866	0.83549	0.789248	0.75373	0.698005	0.65447	0.642161
	1.92963	0.258762	0.296229	0.439128	0.49926	0.76974	0.970937	1.05011	1.30103	1.73842	1.92963	2.07077	2.03123	1.79834	1.69408	1.52981	1.34857	1.27611	1.31649	1.24434	1.09789	0.884543	0.771804	0.669209	0.590439	0.548347	0.538691	0.551062	0.549057	0.542955	0.582074
	0.972764	0.935212	0.93543	1.00805	1.00032	0.943151	0.925158	0.935601	1.15278	1.50101	1.66189	1.54596	1.43897	1.35279	1.25925	1.16926	1.06771	1.00855	0.950349	0.917027	0.855414	0.797653	0.806373	0.792042	0.791168	0.792046	0.825229	0.874061	0.886367	0.88616	0.891025
	0.017787	0.188947	0.261747	0.265242	0.274863	0.320159	0.339801	0.381408	0.543621	0.893058	1.34216	1.30042	1.11269	0.978957	0.899521	0.86429	0.878576	0.880456	0.901111	1.04256	1.14346	1.19537	1.16271	1.11063	1.09446	1.08941	1.17342	1.20348	1.12437	1.14646	1.14907
	0.722794	0.828846	0.870316	1.06634	1.27879	1.58586	1.77293	1.94451	2.18913	2.25142	2.07165	1.7515	1.46979	1.29107	1.17667	0.997306	0.903082	0.845104	0.776527	0.6629	0.610437	0.608256	0.584852	0.55445	0.521336	0.535596	0.653841	0.859256	0.990824	1.05638	1.12167
	0.475227	0.420314	0.419135	0.458442	0.518467	0.527445	0.552236	0.629885	0.87426	1.27056	1.6958	1.54224	1.418	1.35017	1.23958	1.2196	1.2263	1.2286	1.27241	1.26614	1.19364	1.0795	0.966337	0.889301	0.855151	0.798275	0.779697	0.80524	0.803479	0.784868	0.783024
	0.468043	0.628262	0.845023	0.781389	0.705028	0.687821	0.811179	1.13591	1.34461	1.70589	2.08342	2.09182	1.89701	1.63068	1.46456	1.32552	1.22401	1.19295	1.08132	0.908306	0.797924	0.736119	0.694792	0.661054	0.645815	0.636745	0.653261	0.690187	0.796865	0.850629	0.842691
	1.66412	0.903301	0.807229	0.799385	0.794905	0.740974	0.842749	0.963629	1.11883	1.51252	1.66412	1.53414	1.38057	1.25901	1.23455	1.25843	1.17112	1.08235	1.03998	1.02371	0.978202	0.99461	0.987879	0.935204	0.854618	0.816785	0.765581	0.753236	0.769777	0.759117	0.763898
	1.97891	1.83868	1.68757	1.65124	1.61228	1.59446	1.63979	1.74549	1.98896	2.33077	2.45531	2.15779	1.77567	1.52598	1.32189	1.17017	1.08843	1.03733	0.963335	0.822073	0.715747	0.630049	0.542452	0.489609	0.449689	0.393731	0.34532	0.331018	0.319368	0.332795	0.337867
	0.905008	0.821737	0.904678	0.991392	1.02772	1.19259	1.27677	1.35845	1.57887	1.66849	1.49145	1.23875	1.10998	1.0899	1.01625	0.931496	0.91218	0.91156	0.937634	1.04957	1.04557	1.05514	1.03506	0.972554	0.881009	0.797882	0.770981	0.797646	0.808848	0.825327	0.855965
	0.650605	0.72388	0.886096	0.892391	0.884002	1.00395	1.16576	1.28588	1.62107	2.40297	2.60686	2.16592	1.76231	1.47441	1.34604	1.28313	1.17517	1.12539	1.01679	0.88062	0.780726	0.718187	0.703647	0.694432	0.692629	0.637601	0.606276	0.608526	0.594544	0.557529	0.544498
	1.40967	1.21168	0.973448	0.855906	0.876476	0.96103	1.04653	1.15364	1.46009	1.89403	1.9404	1.61447	1.30904	1.15585	1.01279	0.943256	0.877252	0.839433	0.854185	0.862643	0.832827	0.945483	0.987813	0.968574	0.899558	0.8858	0.897692	0.877553	0.808279	0.718886	0.692059
	0.535858	0.586872	0.580403	0.544946	0.543737	0.673191	0.991737	1.33593	1.67452	2.17414	2.60129	2.49723	2.0732	1.72745	1.4981	1.34511	1.22289	1.16452	1.09179	0.971188	0.88927	0.796214	0.70364	0.660285	0.622933	0.59543	0.548414	0.534469	0.518246	0.501986	0.494075
	0.355922	0.5069	0.445885	0.504236	0.545852	0.638114	0.783027	0.958658	1.36129	1.98265	2.01499	2.06564	2.12559	2.01343	1.84007	1.55865	1.32425	1.22373	1.11774	1.03915	0.96841	0.851485	0.804125	0.687606	0.635284	0.57565	0.582417	0.572433	0.516135	0.494191	0.4786
	0.955193	0.886248	0.820264	0.759245	0.814229	0.965459	1.08361	1.06194	1.12322	1.44066	1.52897	1.41822	1.20223	1.12366	1.11793	1.06539	0.974909	0.947866	0.951377	0.999862	1.04546	1.05173	1.04614	1.01238	0.919671	0.854803	0.853291	0.866625	0.807099	0.77135	0.768443
	2.24455	0.730512	0.350016	0.172299	0.148312	0.289197	0.396092	0.518205	0.801403	1.70567	2.24455	1.97923	1.58285	1.38157	1.17652	0.951107	0.878792	0.845802	0.788099	0.74403	0.813937	0.846492	0.908214	0.956902	0.888769	0.922059	0.83167	0.822915	1.03234	1.22476	1.2822
	0.757392	0.59691	0.699369	0.833339	0.904768	1.0852	1.24697	1.22719	1.19112	1.34538	1.14559	1.05502	1.17385	1.10877	1.13683	1.17647	1.07836	1.0952	1.14173	1.02305	0.892572	0.792219	0.78777	0.736982	0.763994	0.784736	0.907059	1.02987	1.08813	1.12715	1.10135
	1.09127	0.698243	0.669226	0.663253	0.656334	0.60691	0.619406	0.786879	1.16922	1.78988	2.32476	2.42972	2.24481	2.15531	2.08883	1.84719	1.55556	1.4164	1.2704	1.11916	0.948383	0.81656	0.713196	0.652435	0.594376	0.52763	0.461093	0.391469	0.348014	0.353213	0.346582
	2.06404	0.770904	0.828821	0.68791	0.752695	0.936652	1.22022	1.54245	1.80517	2.03025	2.06404	1.80266	1.56899	1.47267	1.45254	1.40713	1.3718	1.35238	1.26543	1.07793	0.952923	0.856422	0.822504	0.779918	0.651477	0.608969	0.562798	0.494641	0.43567	0.402441	0.388278
	1.08169	0.900809	0.934734	0.835865	0.810332	0.780348	0.945735	1.13803	1.31971	1.62682	1.65586	1.53121	1.41143	1.29158	1.26355	1.13986	1.04323	1.02471	1.00591	1.00255	0.970168	0.957704	0.946791	0.930184	0.923759	0.838179	0.717928	0.703129	0.716405	0.804815	0.819866
	2.19348	0.434418	0.23616	0.169608	0.167909	0.126572	0.252263	0.593337	1.10259	1.65502	2.19348	1.95222	1.73642	1.6662	1.48462	1.21052	1.13925	1.23923	1.23524	1.40039	1.3176	1.1333	0.999293	0.953247	0.907776	0.826777	0.692961	0.507841	0.468126	0.441682	0.432369
	0.277912	0.287198	0.341587	0.371706	0.425435	0.489107	0.73562	0.918763	1.2456	1.77602	1.82574	1.4994	1.22463	1.18677	1.23052	1.27257	1.31219	1.31989	1.19199	1.15011	1.1235	1.09686	1.02564	0.967127	0.928922	0.808526	0.776098	0.752709	0.712401	0.680222	0.671978
	1.05875	1.16269	1.18781	1.22748	1.24138	1.26554	1.19541	1.1719	1.2573	1.4776	1.5676	1.50774	1.30405	1.15098	1.05962	0.95542	0.91233	0.918418	0.920613	0.874744	0.811459	0.791197	0.800749	0.843892	0.886399	0.9	0.852839	0.858635	0.930074	0.911665	0.890076
	1.73163	0.721624	0.9397	1.00647	1.1362	1.22168	1.23185	1.25215	1.49612	1.7477	1.73163	1.49348	1.30193	1.15981	1.07364	0.979637	0.91157	0.887862	0.92224	0.958638	0.971578	0.965756	0.937978	0.905052	0.877471	0.810057	0.77403	0.782898	0.78326	0.772985	0.756052
	2.21932	2.21932	0.787649	0.591939	0.600583	0.65773	0.778217	0.975977	1.19124	1.72187	2.21932	2.11845	1.78393	1.68655	1.44965	1.16054	0.981762	0.901748	0.849321	0.848452	0.808925	0.733832	0.741196	0.788882	0.844443	0.817229	0.77712	0.766419	0.805388	0.798949	0.795155
	0.329446	0.28718	0.294122	0.304519	0.296994	0.367053	0.461533	0.68823	0.898769	1.4101	1.65496	1.51744	1.41628	1.32336	1.21678	1.19784	1.20956	1.16434	1.10637	1.12862	1.15112	1.15264	1.11044	1.01993	0.975767	0.943413	0.927876	0.897639	0.825104	0.736785	0.72131
	0.835035	0.870417	0.956627	1.0875	1.18863	1.33664	1.41843	1.51921	1.85459	2.52789	2.41045	1.72104	1.38306	1.30526	1.21622	1.13818	1.0475	1.01071	0.933841	0.826566	0.749202	0.79575	0.794276	0.762867	0.773249	0.72587	0.657103	0.640586	0.612283	0.568804	0.545718
	0.407354	0.523121	0.515388	0.612517	0.652797	0.701556	0.786748	1.01609	1.36332	1.88581	1.96726	1.75138	1.56712	1.47569	1.43169	1.36003	1.29928	1.28453	1.14901	1.05047	0.943437	0.895017	0.865519	0.780217	0.751296	0.756472	0.719555	0.667781	0.636546	0.654134	0.668279
	1.07205	1.19152	1.23763	1.12545	1.05788	1.03725	1.07914	1.25883	1.70308	2.14105	2.13263	1.88115	1.81735	1.77211	1.78544	1.73148	1.54217	1.41079	1.21366	0.969907	0.852629	0.739069	0.645069	0.553764	0.524711	0.519802	0.504032	0.495684	0.435738	0.416151	0.396814
	0.409762	0.323501	0.243891	0.207495	0.21517	0.258382	0.420316	0.576806	0.97373	1.71606	1.95913	1.6251	1.45246	1.29547	1.18296	1.05017	1.01609	1.0141	1.03058	1.02212	1.01683	1.011	1.05577	1.03194	0.978123	0.939137	0.883713	0.877915	0.870841	0.864527	0.803636
	1.10748	0.279814	0.191664	0.186447	0.19229	0.207273	0.221289	0.354717	0.535639	0.757939	1.10748	1.34969	1.5656	1.53085	1.54922	1.41924	1.31348	1.25547	1.1296	1.07143	1.14193	1.20375	1.14417	1.06699	1.01666	0.994015	0.927251	0.849819	0.823644	0.813114	0.771889
	1.35298	1.27124	1.21368	1.26447	1.30508	1.37397	1.46584	1.56442	1.67516	1.76664	1.67256	1.52044	1.35263	1.26785	1.17025	1.07616	0.989079	0.942122	0.88333	0.859567	0.898649	0.911864	0.82892	0.750123	0.729443	0.703426	0.665001	0.625447	0.590985	0.56012	0.567584
	0.424725	0.42212	0.424313	0.459322	0.493736	0.564401	0.672723	0.822181	1.01355	1.2413	1.34337	1.20925	1.15094	1.0469	0.953615	0.973108	0.970598	0.991102	1.00768	1.08146	1.10085	1.06946	1.04156	1.00101	1.01179	1.04487	1.09558	1.0495	0.991679	0.967856	0.975664
	1.26485	0.860779	1.31574	1.69052	1.73301	1.69043	1.39629	1.24498	1.15051	1.25325	1.26485	1.15612	1.0621	1.01747	1.0109	0.985035	0.930027	0.86548	0.811857	0.770902	0.754322	0.806263	0.890617	0.994568	1.01301	1.00163	0.966725	0.959847	0.95311	0.947934	0.945628
	2.2482	1.00796	0.866886	0.600673	0.47614	0.428778	0.484303	0.538377	0.909646	1.71361	2.2482	2.07339	2.02599	2.1062	1.9437	1.71213	1.44919	1.33227	1.20846	1.04839	0.940828	0.903834	0.870827	0.846106	0.71514	0.53174	0.414874	0.430186	0.468173	0.52893	0.533826
	2.20996	1.90081	1.74647	1.52837	1.4955	1.38023	1.32154	1.32473	1.32026	1.40519	1.44318	1.39332	1.33249	1.22163	1.13503	1.08705	1.08931	1.11015	1.09497	1.08251	1.03899	0.939399	0.841606	0.771796	0.728837	0.676017	0.622907	0.613143	0.600051	0.549046	0.51853
	0.39504	0.376737	0.450345	0.397764	0.455863	0.485295	0.497463	0.675087	0.952019	1.49518	1.58716	1.50788	1.38306	1.25145	1.18671	1.12963	1.12787	1.14601	1.11113	1.00666	0.98826	0.915346	0.879035	0.897757	0.903109	0.936912	0.968246	0.918141	0.951313	0.936718	0.931327
	-0.06571	-0.02659	0.048637	0.138705	0.176191	0.247452	0.294712	0.391524	0.690947	1.41056	1.81863	1.66411	1.52244	1.39617	1.26076	1.16769	1.09534	1.06126	1.03342	0.980703	0.987143	1.03266	1.03083	0.916128	0.982236	0.962733	0.972302	0.98397	0.980323	0.928513	0.898004
	1.35613	1.23492	1.12732	1.02948	1.02944	1.01421	0.940765	1.01009	1.32366	1.72959	2.01448	1.89225	1.88577	1.96245	1.99864	1.71961	1.45282	1.32666	1.11353	0.857432	0.750673	0.71554	0.689852	0.707784	0.669248	0.584619	0.548013	0.523855	0.495298	0.454227	0.441894
	1.8193	1.59582	1.41028	1.49658	1.6513	1.8347	1.63744	1.42744	1.43334	1.63339	1.95183	1.8919	1.83083	1.61952	1.57255	1.40825	1.31192	1.24502	1.17978	1.10601	1.00855	0.821826	0.751475	0.702986	0.666599	0.610552	0.523499	0.44244	0.379789	0.296678	0.267236
	0.773628	0.774996	0.734924	0.745198	0.714162	0.803069	0.919188	0.985892	1.08017	1.24107	1.24688	1.11282	0.968292	0.875523	0.863744	0.936317	1.01356	1.06618	1.15607	1.19555	1.21097	1.1514	1.08612	0.976942	0.932786	0.91166	0.93863	0.945092	0.93349	0.933259	0.947115

## Sheet: Figure 4D_x0009__x0009_
Compare each cell mean with the other cell mean in that row
Number of families	1
Number of comparisons per family	31
Alpha	0.05
Bonferroni's multiple comparisons test	Predicted (LS) mean diff,	95,00% CI of diff,	Significant?	Summary	Adjusted P Value
siControl - siAKAP6
-4,5	0.2131	0,09232 to 0,3338	Yes	****	<0,0001
-4	0.1705	0,04970 to 0,2912	Yes	***	0.0003
-3,5	0.1708	0,05008 to 0,2916	Yes	***	0.0003
-3	0.1397	0,01889 to 0,2604	Yes	**	0.0083
-2,5	0.1367	0,01598 to 0,2575	Yes	*	0.0111
-2	0.1628	0,04208 to 0,2836	Yes	***	0.0007
-1,5	0.1896	0,06888 to 0,3104	Yes	****	<0,0001
-1	0.2252	0,1045 to 0,3460	Yes	****	<0,0001
-0,5	0.3687	0,2479 to 0,4895	Yes	****	<0,0001
0	0.5321	0,4113 to 0,6529	Yes	****	<0,0001
0,5	0.3292	0,2085 to 0,4500	Yes	****	<0,0001
1	0.077	-0,04376 to 0,1978	No	ns	>0,9999
1,5	0.005406	-0,1154 to 0,1262	No	ns	>0,9999
2	-0.05019	-0,1710 to 0,07057	No	ns	>0,9999
2,5	-0.06207	-0,1828 to 0,05868	No	ns	>0,9999
3	-0.09116	-0,2119 to 0,02960	No	ns	0.5343
3,5	-0.1082	-0,2289 to 0,01259	No	ns	0.1464
4	-0.1053	-0,2261 to 0,01546	No	ns	0.1845
4,5	-0.1131	-0,2339 to 0,007628	No	ns	0.097
5	-0.1161	-0,2369 to 0,004648	No	ns	0.0752
5,5	-0.1005	-0,2213 to 0,02022	No	ns	0.2677
6	-0.08587	-0,2066 to 0,03489	No	ns	0.7709
6,5	-0.07581	-0,1966 to 0,04495	No	ns	>0,9999
7	-0.07467	-0,1954 to 0,04609	No	ns	>0,9999
7,5	-0.06629	-0,1871 to 0,05447	No	ns	>0,9999
8	-0.06031	-0,1811 to 0,06045	No	ns	>0,9999
8,5	-0.04803	-0,1688 to 0,07273	No	ns	>0,9999
9	-0.04011	-0,1609 to 0,08065	No	ns	>0,9999
9,5	-0.03462	-0,1554 to 0,08614	No	ns	>0,9999
10	-0.03519	-0,1559 to 0,08557	No	ns	>0,9999
10.5	-0.0225	-0,1433 to 0,09826	No	ns	>0,9999
Test details	Predicted (LS) mean 1	Predicted (LS) mean 2	Predicted (LS) mean diff,	SE of diff,	N1	N2	t	DF
siControl - siAKAP6
-4,5	1.026	0.8124	0.2131	0.03825	37	48	5.57	2573
-4	0.9381	0.7676	0.1705	0.03825	37	48	4.456	2573
-3,5	0.9274	0.7566	0.1708	0.03825	37	48	4.466	2573
-3	0.882	0.7423	0.1397	0.03825	37	48	3.651	2573
-2,5	0.8748	0.738	0.1367	0.03825	37	48	3.575	2573
-2	0.9076	0.7448	0.1628	0.03825	37	48	4.257	2573
-1,5	0.9809	0.7913	0.1896	0.03825	37	48	4.958	2573
-1	1.093	0.8681	0.2252	0.03825	37	48	5.889	2573
-0,5	1.473	1.104	0.3687	0.03825	37	48	9.638	2573
0	1.799	1.267	0.5321	0.03825	37	48	13.91	2573
0,5	1.671	1.341	0.3292	0.03825	37	48	8.606	2573
1	1.373	1.296	0.077	0.03825	37	48	2.013	2573
1,5	1.281	1.275	0.005406	0.03825	37	48	0.1413	2573
2	1.164	1.214	-0.05019	0.03825	37	48	1.312	2573
2,5	1.112	1.174	-0.06207	0.03825	37	48	1.623	2573
3	1.043	1.134	-0.09116	0.03825	37	48	2.383	2573
3,5	0.997	1.105	-0.1082	0.03825	37	48	2.828	2573
4	0.9795	1.085	-0.1053	0.03825	37	48	2.753	2573
4,5	0.9537	1.067	-0.1131	0.03825	37	48	2.957	2573
5	0.9422	1.058	-0.1161	0.03825	37	48	3.035	2573
5,5	0.921	1.022	-0.1005	0.03825	37	48	2.628	2573
6	0.9074	0.9932	-0.08587	0.03825	37	48	2.245	2573
6,5	0.9029	0.9787	-0.07581	0.03825	37	48	1.982	2573
7	0.8877	0.9624	-0.07467	0.03825	37	48	1.952	2573
7,5	0.8859	0.9522	-0.06629	0.03825	37	48	1.733	2573
8	0.8713	0.9316	-0.06031	0.03825	37	48	1.577	2573
8,5	0.8619	0.9099	-0.04803	0.03825	37	48	1.256	2573
9	0.8548	0.8949	-0.04011	0.03825	37	48	1.048	2573
9,5	0.85	0.8846	-0.03462	0.03825	37	48	0.9051	2573
10	0.8436	0.8788	-0.03519	0.03825	37	48	0.9199	2573
10.5	0.8419	0.8644	-0.0225	0.03825	37	48	0.5881	2573

## Sheet: Raw_Figure 4D
	Distance from nuclear edge (µm)
	-4.5	-4	-3.5	-3	-2.5	-2	-1.5	-1	-0.5	0	0.5	1	1.5	2	2.5	3	3.5	4	4.5	5	5.5	6	6.5	7	7.5	8	8.5	9	9.5	10	10.5
siControl	0.77523	0.808038	0.802697	0.746335	0.732405	0.752473	0.860846	0.978541	1.56549	1.88129	2.08426	1.80017	1.63965	1.29594	1.21179	1.10539	1.04038	0.992619	0.92592	0.882782	0.809668	0.811448	0.847284	0.870328	0.865095	0.845585	0.807928	0.772966	0.786982	0.805169	0.817528
	1.10857	1.04447	1.05111	1.02772	0.947108	0.899783	0.977902	1.08972	1.41528	1.52776	1.47524	1.45836	1.37241	1.15387	1.08246	1.01185	0.951889	0.955158	0.978211	0.973773	0.948572	0.925075	0.902735	0.85833	0.851353	0.833136	0.844843	0.874909	0.87243	0.871699	0.861425
	0.780072	0.780864	0.759605	0.770738	0.792962	0.817713	0.875949	0.947692	1.35838	1.55325	1.75066	1.65786	1.55027	1.15873	1.09088	1.01025	0.925166	0.893168	0.892178	0.906223	0.908285	0.912693	0.918517	0.88656	0.870941	0.841662	0.875623	0.890928	0.91456	0.933384	1.01952
	0.740562	0.711309	0.678368	0.663009	0.67004	0.752623	0.850121	0.93061	1.28436	1.50655	1.84599	1.66963	1.53882	1.27846	1.14845	1.07661	1.08334	1.05144	1.03381	1.03183	0.978435	0.943299	0.893344	0.898176	0.911025	0.884764	0.859742	0.834393	0.787622	0.776828	0.757618
	1.03074	1.05069	1.03356	0.913213	0.868099	0.918276	1.04171	1.19034	1.6136	1.76642	1.66697	1.39666	1.3156	1.1319	1.04794	0.98002	0.924065	0.908568	0.875624	0.859673	0.847272	0.829912	0.83764	0.843159	0.848073	0.857842	0.875931	0.886411	0.892775	0.923404	0.936206
	1.19536	1.18085	1.18132	1.15123	1.08428	1.01514	1.02338	1.06813	1.29585	1.44586	1.63477	1.32005	1.26863	1.21792	1.1678	1.01438	0.969415	0.977799	0.958562	0.932612	0.949962	0.890735	0.860841	0.824882	0.841762	0.854938	0.811103	0.804621	0.792004	0.804069	0.803937
	0.808528	0.855324	0.868229	0.754823	0.714449	0.708171	0.804444	0.937512	1.48795	1.78344	1.98175	1.90549	1.86125	1.69728	1.61141	1.45637	1.25783	1.19314	1.01437	0.940028	0.81654	0.723796	0.727872	0.749623	0.751242	0.680591	0.659898	0.660666	0.695347	0.714705	0.693405
	0.876343	1.08225	1.1443	1.23372	1.30204	1.41227	1.4275	1.4873	1.50151	1.50469	1.52281	1.31035	1.26843	1.2413	1.18623	1.06836	1.01792	1.01914	0.954223	0.928082	0.903713	0.889349	0.891673	0.861952	0.859926	0.815146	0.799466	0.792422	0.765191	0.757524	0.753948
	0.647598	0.641988	0.718122	0.794033	0.828251	0.864112	0.848243	0.858951	1.1025	1.21147	1.2634	1.248	1.23889	1.2033	1.15154	1.04845	1.01644	1.00456	0.944121	0.931712	0.964786	1.10442	1.16565	1.12495	1.06685	0.97711	0.953273	0.918208	0.814192	0.802198	0.815518
	1.10641	1.02441	1.03266	1.08953	1.07887	0.995712	1.00954	1.01924	1.14576	1.30166	1.43007	1.34341	1.32113	1.27854	1.21952	1.11184	1.01628	0.985472	0.986447	1.00265	0.962203	0.924827	0.905329	0.882432	0.877941	0.861365	0.862234	0.8786	0.872798	0.865565	0.82412
	2.02752	0.68873	0.70411	0.708202	0.768205	0.898005	1.10602	1.24527	1.72986	1.98737	2.02752	1.61519	1.53501	1.33319	1.21104	1.05781	0.98287	0.985221	0.984508	0.965687	0.885596	0.869606	0.852658	0.835959	0.811756	0.784715	0.753814	0.747041	0.747243	0.75229	0.754771
	1.74008	1.74008	1.74008	0.545665	0.599934	0.729133	0.854631	0.938669	1.20354	1.43936	1.74008	1.56841	1.49599	1.28388	1.17677	1.07905	1.03179	0.997655	0.943964	0.922858	0.902483	0.893913	0.896491	0.876987	0.883789	0.908839	0.914693	0.909552	0.893566	0.879242	0.876353
	0.842613	0.745957	0.739229	0.775043	0.794431	0.780517	0.845807	0.916249	1.08374	1.24427	1.47113	1.31937	1.28786	1.20172	1.13258	1.01441	1.07457	1.1495	1.07357	1.0164	0.973601	0.923804	0.919812	0.928883	0.960011	0.928281	0.934641	0.943177	0.902331	0.866618	0.867959
	1.0824	1.09811	1.06171	0.96642	0.912288	0.902974	0.972853	1.07434	1.5719	1.86459	2.25486	1.64708	1.37906	1.06015	0.965256	0.83412	0.801522	0.813409	0.859926	0.849917	0.854967	0.889167	0.909928	0.945601	0.901517	0.864193	0.868708	0.856076	0.848887	0.804369	0.758049
	0.566306	0.625807	0.658202	0.729628	0.789333	0.893276	0.915953	0.925807	1.15488	1.31835	1.36626	1.25872	1.22929	1.15176	1.10594	1.06885	1.03317	1.03512	1.05399	1.05568	1.02515	1.02187	0.987712	0.923118	0.912478	0.894043	0.901241	0.904393	0.904668	0.912877	0.931784
	1.24095	1.21088	1.18542	1.11188	1.07496	1.05123	0.981136	0.939612	0.982489	1.06395	1.24095	1.16721	1.0847	0.946804	0.863604	0.831339	0.851817	0.858761	0.899844	0.952783	0.978036	0.986368	0.998846	0.981332	0.987762	1.00294	1.01524	1.0004	1.0218	1.04046	1.07968
	0.84731	0.857124	0.852362	0.917358	0.944159	1.0164	1.0989	1.20059	1.57896	1.77895	1.75363	1.34101	1.21426	0.991724	0.945425	0.915031	0.936183	0.946036	0.927701	0.962349	0.995566	0.976536	0.95817	0.910317	0.895754	0.86522	0.850218	0.841871	0.828079	0.824402	0.866848
	0.883038	0.839086	0.84764	0.878849	0.898954	0.935661	1.02312	1.05992	1.21031	1.32457	1.62079	1.48899	1.39969	1.2249	1.15837	1.0741	1.02016	1.02348	0.976157	0.94089	0.909081	0.901657	0.898235	0.880446	0.887565	0.889883	0.857711	0.866904	0.880621	0.871761	0.847505
	1.75685	1.8688	1.92071	1.94271	1.9101	1.86317	1.86369	1.82398	1.75187	1.78696	1.77894	1.34796	1.21449	1.05795	1.00429	0.888529	0.85118	0.842926	0.840797	0.830064	0.793078	0.758191	0.762059	0.738541	0.723789	0.684828	0.646364	0.647581	0.666413	0.659328	0.649505
	1.03732	1.0783	1.18479	1.08772	1.02181	1.02488	0.960724	0.84572	0.939012	1.09618	1.31359	1.32152	1.33686	1.20132	1.1174	0.986749	0.93354	0.908193	0.877958	0.885411	0.92613	0.983479	0.96804	0.946591	0.954078	0.965735	0.940829	0.932246	0.9498	0.987322	0.984997
	0.75773	0.806086	0.803482	0.776899	0.785307	0.85896	1.04061	1.27279	1.97041	2.21096	1.83221	1.30045	1.16184	0.951886	0.91504	0.861513	0.879182	0.896787	0.874611	0.881089	0.846978	0.854318	0.871877	0.904124	0.921941	0.959557	0.958815	0.945429	0.887344	0.864418	0.826505
	1.08472	1.0236	0.982306	0.943134	0.964479	1.00348	1.08802	1.19076	1.71575	1.84538	1.45182	1.11514	1.04892	0.989966	0.960984	0.935882	0.881021	0.84714	0.828163	0.812013	0.813956	0.843685	0.825216	0.823389	0.840904	0.853604	0.90238	0.936113	1.06132	1.08938	1.13025
	1.70596	0.742598	0.791971	0.829824	0.852425	0.92842	1.0651	1.18711	1.89085	2.1182	1.70596	1.33024	1.2399	1.03956	0.991593	0.945783	0.969515	0.948886	0.976932	0.972212	0.924817	0.907135	0.905776	0.865804	0.843591	0.827348	0.850151	0.865994	0.868637	0.847778	0.822368
	0.91059	0.994071	1.01143	1.02668	1.03985	1.1559	1.31587	1.51947	2.0805	2.1371	1.61234	1.21148	1.16997	1.12118	1.09892	1.04379	0.961286	0.931111	0.930588	0.92259	0.850812	0.798804	0.783697	0.771307	0.780415	0.802763	0.850171	0.845071	0.808031	0.815618	0.805316
	0.476399	0.499901	0.542254	0.592626	0.636379	0.746177	0.81999	0.971851	1.76701	2.11477	1.87971	1.25897	1.18476	1.23497	1.26233	1.2608	1.1408	1.03354	0.918143	0.913087	0.917397	0.872274	0.85135	0.871384	0.882728	0.829416	0.829121	0.836683	0.848633	0.841982	0.836148
	0.610492	0.63854	0.653745	0.691214	0.70772	0.747572	0.868583	0.985677	1.38847	1.53717	1.45661	1.29403	1.23937	1.16127	1.07394	0.991947	1.02253	1.00915	0.927489	0.930572	0.983607	1.05154	1.06102	1.02007	0.999704	0.962695	0.942163	0.939223	0.925262	0.888858	0.865959
	0.873484	0.782096	0.752565	0.727411	0.716871	0.712005	0.803058	0.967958	1.33981	1.4152	1.43593	1.57644	1.6287	1.73747	1.76988	1.55505	1.21803	1.13992	1.06159	1.02327	0.942446	0.8875	0.862624	0.811522	0.777125	0.735701	0.71676	0.708608	0.68265	0.679715	0.685446
	0.595771	0.759185	0.629607	0.561652	0.564454	0.686825	0.80077	0.897015	1.22144	2.11817	2.01123	1.49522	1.23035	1.16382	1.15208	1.22197	1.09368	1.02744	0.992809	0.98525	0.976264	0.950168	0.926139	0.886812	0.893476	0.888425	0.890711	0.857806	0.816093	0.80957	0.825165
	0.665468	0.582394	0.568563	0.608534	0.677998	0.760352	0.877619	1.05682	1.30888	1.89766	2.05878	1.39973	1.17678	1.11648	1.09806	1.02115	1.0025	0.982636	0.94863	0.933298	0.933851	0.92807	0.956512	0.951961	0.965569	0.936832	0.898736	0.883021	0.877746	0.872862	0.871568
	0.903899	0.661954	0.659381	0.658252	0.679287	0.732555	0.651201	0.812921	1.13493	1.85814	1.42075	1.16369	1.03256	1.04809	0.994131	1.08078	1.08655	1.12998	1.02488	0.984206	0.990093	0.984151	0.999366	1.02585	0.967495	1.00476	0.959965	0.922986	0.95473	0.884842	0.86554
	0.758214	0.748866	0.738553	0.767861	0.733398	0.588665	0.621875	0.792097	1.31686	2.31777	2.06025	1.35539	1.18879	1.10165	1.02866	1.03359	1.02876	0.955266	0.949125	0.96509	0.95782	0.925416	0.950955	0.90117	0.976848	0.976563	0.911834	0.85752	0.854044	0.840746	0.876695
	1.52307	1.33442	1.19514	0.942736	0.898418	0.864828	0.935017	1.09899	1.79136	2.74944	1.45671	1.05118	1.10868	1.09454	1.17572	1.18443	1.14903	1.0631	1.02584	0.963169	0.94344	0.86224	0.847948	0.815449	0.759747	0.774297	0.811792	0.814568	0.781948	0.765061	0.770812
	1.50376	0.776258	0.8548	0.937089	0.889107	0.956255	1.10931	1.39044	1.83578	2.33874	1.50376	1.17742	1.07354	0.950418	0.958018	0.951552	0.947447	0.990253	1.05133	1.00393	0.927312	0.879575	0.895905	0.870535	0.925035	0.882365	0.868582	0.894621	0.86515	0.890148	0.849575
	0.909235	0.898226	0.698908	0.820422	0.739543	0.775163	0.803587	1.03031	1.4595	1.84916	1.39308	1.19728	1.07481	1.03929	1.05787	1.06306	1.02194	0.93707	0.964432	0.970068	0.960956	0.957433	0.910876	0.980941	0.99011	0.978703	1.02146	0.960761	0.925378	0.876456	0.840229
	0.967866	0.949922	0.833711	0.74222	0.72264	0.691929	0.830542	1.15728	1.60413	2.07906	1.62916	1.06999	0.998456	1.08668	1.02647	0.955402	0.943041	1.01176	1.00169	1.04106	0.955215	0.944884	0.935632	0.937022	1.00278	0.988804	0.87412	0.855765	0.895886	0.81525	0.809728
	0.900206	0.969589	1.04401	0.982559	0.866681	1.05173	1.18638	1.34047	2.07704	3.1383	1.70959	1.20325	1.04622	1.02198	0.994443	0.966128	0.920339	0.900472	0.89775	0.90478	0.925009	0.897632	0.867805	0.824992	0.802135	0.814753	0.807591	0.804096	0.830915	0.839271	0.871785
	1.70378	1.60914	1.39035	1.2171	1.15922	1.09016	1.13301	1.30354	1.6176	2.45176	1.97035	1.42642	1.22814	1.09562	0.991264	0.895977	0.903377	0.894658	0.910588	0.883571	0.895316	0.867859	0.851837	0.815071	0.786141	0.779858	0.761378	0.734284	0.729414	0.737152	0.69688
siAKAP6	1.16417	0.590693	0.581341	0.632383	0.642127	0.681074	0.71466	0.746135	0.859078	0.963698	1.16417	1.19577	1.18007	1.19835	1.17763	1.17616	1.11668	1.08541	1.038	1.03727	0.993666	0.985228	0.985612	1.00173	1.0219	1.02745	1.04066	1.03212	0.942157	0.919619	0.889323
	0.573658	0.641342	0.665651	0.731521	0.795032	0.850492	0.919753	0.986757	1.07661	1.10223	1.19995	1.17709	1.15389	1.1667	1.17822	1.17106	1.13243	1.1727	1.26719	1.28434	1.21372	1.07498	1.02598	1.00651	0.997531	0.928805	0.86474	0.823307	0.778017	0.744566	0.741308
	0.706369	0.668239	0.662514	0.653653	0.664897	0.682868	0.758072	0.802894	0.940046	1.03616	1.22476	1.18345	1.18969	1.11072	1.08478	1.05147	1.09686	1.12004	1.13274	1.10961	1.06372	1.0034	0.970187	0.970652	0.987577	0.968561	0.94747	0.956873	0.966064	0.962705	0.967186
	0.761052	0.715321	0.702767	0.750392	0.75424	0.794832	0.86967	0.963083	1.28106	1.33743	1.17267	1.0574	1.0332	1.06441	1.01546	0.970855	0.962994	0.977945	1.01214	1.01795	0.999146	1.0139	1.02217	1.01484	1.00607	0.997235	0.963338	0.949096	0.967136	0.993974	1.00448
	1.16164	1.08937	1.07748	1.06273	1.03984	0.97587	1.05455	1.13602	1.62125	1.77891	1.67361	1.46083	1.34651	1.15981	1.07855	1.06473	1.08983	1.08612	0.997028	0.980963	0.968311	0.938344	0.929743	0.909585	0.854371	0.823866	0.809493	0.774415	0.718558	0.702393	0.683157
	0.926477	0.98515	0.998191	0.923491	0.922994	0.91265	0.908329	0.938651	0.96425	0.986259	1.10003	1.11637	1.0805	1.03712	1.023	1.01218	1.0117	1.00322	1.04225	1.04499	1.04082	1.07483	1.07976	1.08419	1.09111	1.05107	0.945487	0.922743	0.887108	0.887744	0.914736
	0.810836	0.738	0.715258	0.75241	0.772975	0.842916	0.907537	0.928667	1.07251	1.18656	1.2807	1.0957	1.05115	0.955265	0.931521	0.944478	0.983439	0.993328	1.02743	1.04665	1.06564	1.03943	1.03586	1.02016	1.01006	1.02415	1.03308	1.00676	0.944495	0.947637	0.981888
	0.951704	0.94574	0.947809	0.948727	0.944731	0.976612	0.992485	1.04777	1.12228	1.12506	1.12568	1.16279	1.15468	1.14395	1.14896	1.18008	1.18878	1.19499	1.14153	1.12551	1.03636	1.00798	0.950786	0.889269	0.881548	0.863472	0.913881	0.900988	0.850483	0.829962	0.833546
	0.746894	0.740802	0.793443	0.94095	0.913823	0.842878	0.881572	0.953999	1.17993	1.28209	1.30216	1.31061	1.33365	1.39575	1.4117	1.28822	1.07703	0.997821	0.964486	0.974247	0.906259	0.847932	0.845165	0.847711	0.850467	0.907734	0.929721	0.931963	0.915259	0.922012	0.88531
	0.692749	0.826634	0.863037	0.802258	0.795593	0.944619	0.926385	0.917423	0.986055	1.00551	1.01515	1.00833	1.0208	1.01241	0.969199	1.01944	1.02638	1.02471	1.08751	1.06514	1.01785	0.997192	1.01409	1.05659	1.05619	1.01326	1.02149	1.02024	0.993466	0.994385	0.972122
	1.21391	1.23175	1.23497	1.21443	1.20736	1.13687	1.1119	1.11422	1.17217	1.2457	1.33006	1.3245	1.34193	1.30494	1.20981	1.06123	1.00378	1.01174	0.996489	0.983469	0.928585	0.9411	0.940148	0.906113	0.885625	0.842478	0.81031	0.792163	0.79688	0.80184	0.815428
	1.00296	1.02442	1.04769	1.08086	1.06512	0.977934	1.00113	1.06048	1.29277	1.37985	1.4129	1.39474	1.4092	1.36101	1.32499	1.25013	1.19714	1.15418	1.10492	1.06345	0.99689	0.963047	0.923963	0.837249	0.810842	0.785522	0.767493	0.757764	0.750912	0.732423	0.725053
	0.771691	0.908439	0.866077	0.726721	0.739494	0.795507	0.84572	0.914065	1.13542	1.22723	1.36028	1.5683	1.57961	1.48748	1.41809	1.32067	1.25866	1.18986	1.07579	1.00965	0.913942	0.880587	0.88454	0.830025	0.809088	0.792209	0.808225	0.808021	0.844601	0.839842	0.822916
	0.728941	0.752593	0.757289	0.78249	0.762459	0.7948	0.920921	1.05368	1.40905	1.58493	1.67002	1.32779	1.23485	1.0474	1.01011	0.969658	0.929387	0.910288	0.923316	0.929929	0.907427	0.96853	0.957413	0.948075	0.950726	0.950339	0.920093	0.903659	0.933923	0.945989	0.90534
	1.00841	0.952231	0.936397	1.00073	1.00406	0.98481	0.981081	0.975299	1.02693	1.05973	1.11937	1.19015	1.23225	1.18516	1.12909	1.13538	1.07706	1.04924	0.978741	0.959968	0.896025	0.905979	0.927147	0.966356	0.981384	0.973162	0.941705	0.924715	0.931716	0.944213	0.92924
	0.694973	0.695729	0.715011	0.692639	0.674639	0.706296	0.773484	0.815298	0.99198	1.15482	1.26782	1.17462	1.12672	1.11934	1.14521	1.14728	1.1169	1.12248	1.10688	1.12213	1.11667	1.04696	1.02041	0.965951	0.942715	0.930387	0.936035	0.952876	0.960022	0.923627	0.886951
	0.570986	0.626695	0.612423	0.591075	0.594466	0.756424	0.88114	0.93196	1.13991	1.20886	1.21497	1.13818	1.13163	1.15179	1.15512	1.07796	1.06913	1.10977	1.13437	1.11969	1.04267	1.05031	1.02002	0.943595	0.955426	0.949332	0.953801	0.944373	0.928467	0.926995	0.877475
	1.44098	0.546596	0.526526	0.57969	0.618689	0.68262	0.683925	0.733068	0.923127	1.08257	1.44098	1.43143	1.39684	1.28199	1.27986	1.30039	1.19976	1.10204	1.02539	1.00062	0.93011	0.931644	0.930791	0.921455	0.920162	0.904417	0.871179	0.889067	0.944166	0.940394	0.893148
	0.948251	0.949407	0.949207	0.936209	0.916045	0.876158	0.89084	0.90281	0.930346	0.975576	1.04504	1.11519	1.15071	1.17166	1.16513	1.12742	1.08885	1.06001	1.00328	0.98131	0.982697	0.973023	0.962422	0.966201	0.9722	0.977965	0.970317	0.952028	0.983106	0.989722	0.970575
	1.0227	0.640435	0.651706	0.584658	0.565793	0.552701	0.629577	0.749663	0.986609	1.02855	1.0227	1.07912	1.10051	1.03024	0.989396	0.975446	1.05057	1.04659	0.963163	0.945062	1.01988	1.05799	1.05139	1.07099	1.06971	1.06266	1.06802	1.05015	1.02502	1.02201	1.03972
	0.447533	0.467404	0.48107	0.519448	0.514253	0.580489	0.718127	0.822099	1.08956	1.19287	1.24613	1.30482	1.31207	1.2658	1.17668	1.02234	0.919344	0.928586	0.94578	0.936707	0.935167	0.961706	0.964506	0.989487	1.01547	1.03232	1.02802	1.03127	1.03753	1.03744	1.00254
	1.01559	1.13228	1.1141	1.07525	1.07862	1.01558	1.07016	1.20606	1.5336	1.64163	1.55533	1.48747	1.45347	1.4301	1.4031	1.33186	1.129	1.06696	0.952701	0.922651	0.845606	0.844119	0.838204	0.825904	0.839697	0.819104	0.769459	0.745626	0.729382	0.711001	0.688608
	0.717985	0.697757	0.690945	0.667057	0.659256	0.663267	0.699567	0.807504	1.00657	1.06893	1.23929	1.25105	1.26338	1.2423	1.21736	1.20653	1.31733	1.36012	1.38672	1.33427	1.23118	1.13062	1.11357	1.0295	1.0031	0.911914	0.799713	0.761236	0.721471	0.696559	0.666221
	0.727487	0.721467	0.681871	0.664745	0.656049	0.620144	0.640911	0.702728	1.00342	1.22464	1.42664	1.46878	1.44992	1.50296	1.45781	1.37096	1.21881	1.17071	1.11594	1.12677	1.14366	0.972239	0.916034	0.888986	0.89753	0.890054	0.832761	0.795604	0.730273	0.724538	0.746465
	0.474791	0.465107	0.470571	0.473283	0.491785	0.518672	0.55303	0.609257	1.03222	1.30998	1.48255	1.30416	1.27772	1.24923	1.24924	1.19607	1.14551	1.11774	1.13166	1.14548	1.07724	1.036	1.0568	1.01996	0.992481	0.974042	0.973045	0.960152	0.930489	0.934364	0.933973
	0.653103	0.647239	0.655396	0.715048	0.772408	0.756439	0.815612	0.923809	1.43028	1.62832	1.77354	1.60444	1.53124	1.31405	1.24249	1.12096	1.05646	1.04448	1.08826	1.11469	1.07098	0.959509	0.919896	0.889216	0.908013	0.877092	0.802725	0.778869	0.765892	0.736021	0.683968
	0.91812	0.895125	0.873317	0.805729	0.783431	0.718834	0.754614	0.824741	1.28319	1.55555	1.79903	1.64185	1.56714	1.42567	1.39367	1.30802	1.20642	1.13246	1.04194	1.00723	0.906295	0.875733	0.879182	0.860426	0.832691	0.747876	0.747042	0.740605	0.730929	0.724389	0.728207
	0.445551	0.485658	0.529131	0.561137	0.577336	0.62541	0.732757	0.902284	1.30885	1.5005	1.52103	1.50952	1.49165	1.37408	1.24525	1.15223	1.12219	1.10666	1.09645	1.08787	1.04886	1.05169	1.06273	0.994814	0.935755	0.885156	0.884304	0.86438	0.788588	0.73031	0.679718
	0.48429	0.536548	0.537011	0.613565	0.657104	0.776726	0.988292	1.17394	1.67458	1.8224	1.90234	1.74489	1.6287	1.38189	1.28612	1.18472	1.06326	1.03382	0.94167	0.913291	0.883014	0.8358	0.824476	0.797837	0.776456	0.80229	0.834919	0.829683	0.846119	0.826819	0.782477
	1.12372	1.00633	0.888368	0.732449	0.700549	0.689203	0.735665	0.814384	1.17691	1.33455	1.3975	1.2881	1.25022	1.17398	1.13527	1.12302	1.14681	1.16275	1.14092	1.11132	1.01922	0.972142	0.963368	0.976541	0.954287	0.949991	0.86349	0.820865	0.807106	0.820615	0.797426
	1.16584	1.10023	1.05832	1.00876	0.97369	0.967479	1.01999	1.07141	1.31411	1.39157	1.28766	1.13319	1.10426	1.07711	1.05166	1.07961	1.02144	1.01328	0.996944	1.00332	1.07954	1.0204	0.979614	0.923186	0.912378	0.890438	0.868958	0.851373	0.834094	0.847424	0.825518
	1.13822	1.11354	1.07895	0.962707	0.927452	0.913537	0.886187	0.898332	1.04396	1.09949	1.13822	1.07241	1.03275	1.03704	1.02781	0.993754	0.970202	0.978309	0.971836	0.978071	0.986437	1.01259	1.05477	1.04884	1.00975	0.996459	0.954494	0.945042	0.961171	0.987651	0.970402
	0.813431	0.787058	0.795771	0.856228	0.839394	0.824418	0.844063	0.892481	1.1544	1.23803	1.34922	1.30171	1.29852	1.2704	1.23592	1.19544	1.14683	1.1125	1.08076	1.07668	0.997257	0.980392	0.965372	0.912932	0.893847	0.903854	0.913209	0.896893	0.851917	0.840488	0.824582
	1.31483	1.23135	1.19802	1.11672	1.08349	0.984715	0.986833	1.04476	1.35389	1.36752	1.18359	1.23116	1.27814	1.17702	1.08968	1.00276	0.992662	1.00309	0.963705	0.950916	0.94117	0.928837	0.930864	0.934679	0.937216	0.90591	0.907156	0.895179	0.880857	0.875696	0.876646
	1.09097	1.08774	1.05773	0.982838	0.926578	0.87173	0.871189	0.915434	1.05933	1.15887	1.23608	1.20958	1.16912	1.10492	1.07865	1.06006	1.04085	1.02876	1.02057	1.01092	0.982573	0.95283	0.939881	0.924188	0.931072	0.920928	0.937001	0.931186	0.932149	0.92934	0.936137
	0.551579	0.567181	0.558981	0.56515	0.566259	0.59657	0.669965	0.769299	1.07667	1.23862	1.33467	1.28898	1.27182	1.18914	1.19709	1.24795	1.21928	1.20704	1.16843	1.15281	1.12024	1.03828	1.02514	0.958375	0.922668	0.893758	0.87615	0.871312	0.896946	0.900864	0.893736
	0.716861	0.726089	0.712534	0.696548	0.720966	0.741469	0.786689	0.842754	1.01038	1.05651	1.03253	1.05788	1.08556	1.04618	1.02115	0.968737	0.998656	1.01449	1.0162	0.976466	0.972038	1.03449	1.03437	1.06374	1.05665	1.04659	1.0378	1.04072	1.0472	1.05181	1.07094
	1.00791	1.02397	1.00689	0.918886	0.943311	1.014	1.01591	1.06269	1.29412	1.40067	1.30923	1.25086	1.21737	1.11922	1.08544	1.03719	0.982843	0.972939	0.997712	0.979002	0.936927	0.930404	0.942332	0.97908	0.963771	0.924702	0.908263	0.905934	0.904282	0.887023	0.818521
	0.627345	0.62957	0.63436	0.642485	0.645016	0.724018	0.860862	0.962835	1.26096	1.3951	1.31618	1.22187	1.17403	1.13066	1.11566	1.0953	1.09831	1.03964	0.997383	0.999142	1.02004	1.0133	1.00561	0.998629	0.996767	0.969444	0.929174	0.916597	0.898874	0.88902	0.893427
	0.802697	0.773805	0.735739	0.695279	0.689822	0.736581	0.797987	0.86616	1.07195	1.23985	1.27911	1.17186	1.17339	1.17444	1.14623	1.13136	1.16891	1.1517	1.1152	1.10818	1.08287	1.01375	0.988589	0.97399	0.958421	0.901329	0.869592	0.879672	0.883105	0.884075	0.871066
	0.67653	0.693213	0.6988	0.670938	0.668087	0.669549	0.719295	0.781051	0.964615	1.06044	1.04671	1.06165	1.06336	1.01291	0.995607	1.01062	1.02876	1.00439	0.986416	1.01946	1.05873	1.09375	1.08106	1.08457	1.08156	1.07862	1.02188	1.02021	1.04043	1.03765	1.01042
	0.444977	0.420266	0.396474	0.393813	0.376388	0.364121	0.412834	0.562161	0.830863	1.44955	1.52006	1.39064	1.47511	1.5319	1.50313	1.37177	1.36114	1.17326	1.06817	0.974015	0.971491	0.939235	0.911728	0.941272	0.93342	0.938239	0.88111	0.857577	0.863816	0.867688	0.91349
	0.911501	0.692227	0.704553	0.599982	0.515847	0.45538	0.451587	0.528083	0.788581	1.35414	1.69291	1.46107	1.33671	1.17617	1.13914	1.04868	1.02628	1.07458	1.12541	1.12734	1.11135	1.04438	0.999115	1.00484	1.00704	0.950604	0.927764	0.844364	0.872237	0.893019	0.914014
	0.601983	0.565086	0.527917	0.426854	0.434852	0.424594	0.415034	0.521423	0.646668	0.966275	1.3455	1.56001	1.36525	1.18969	1.05341	0.977701	1.02135	1.11205	1.2343	1.25972	1.14466	1.00919	0.910596	0.954742	0.974377	0.982403	1.00176	1.00413	1.00009	1.00034	0.928991
	0.329082	0.327936	0.359042	0.34914	0.330319	0.368548	0.471212	0.541468	0.782486	1.18111	1.18283	1.23962	1.2697	1.25673	1.13482	1.1573	1.18842	1.1383	1.22267	1.17794	1.15299	1.16901	1.10714	1.03985	1.03428	1.06397	0.979686	0.906849	0.89185	0.916943	0.91901
	1.00377	0.788092	0.655832	0.631846	0.651281	0.590219	0.588784	0.794911	0.971886	1.52923	1.52964	1.48668	1.41193	1.2322	1.19096	1.20898	1.18945	1.12739	0.999223	1.0153	0.99618	0.996813	0.972448	1.02847	0.952726	0.874482	0.912384	0.881297	0.872559	0.834724	0.831367
	0.431958	0.541127	0.47963	0.483769	0.452395	0.408908	0.407661	0.609161	0.918929	1.50552	1.64538	1.58868	1.48951	1.32491	1.25703	1.20324	1.23485	1.09988	1.10936	1.17493	1.13943	1.1097	1.10543	1.03109	1.00341	0.915644	0.821382	0.833659	0.819964	0.811178	0.782612
	0.46055	0.454163	0.4306	0.415087	0.395062	0.360574	0.412632	0.545341	0.807995	1.14851	1.47009	1.37667	1.52136	1.48182	1.38466	1.40308	1.35474	1.28058	1.26833	1.31149	1.13997	1.04627	1.00782	0.962381	0.925926	0.894857	0.875484	0.849667	0.861533	0.811689	0.76203
