# Supplementary material for: AKAP6 orchestrates the nuclear envelope microtubule-organizing center by linking golgi and nucleus via AKAP9
Source: eLife. 2020 Dec 9;9:e61669. doi: 10.7554/eLife.61669 (PMC7725499; doi:10.7554/eLife.61669)
Supplement: Figure 5—source data 1. [file elife-61669-fig5-data1.xlsx]

## Sheet: Figure 5B
Compare each cell mean with the other cell mean in that row										Compare each cell mean with the other cell mean in that row										Compare each cell mean with the other cell mean in that row
Number of families	1									Number of families	1									Number of families	1
Number of comparisons per family	31									Number of comparisons per family	31									Number of comparisons per family	31
Alpha	0.05									Alpha	0.05									Alpha	0.05
Bonferroni's multiple comparisons test	Predicted (LS) mean diff,	95,00% CI of diff,	Significant?	Summary	Adjusted P Value					Bonferroni's multiple comparisons test	Predicted (LS) mean diff,	95,00% CI of diff,	Significant?	Summary	Adjusted P Value					Bonferroni's multiple comparisons test	Predicted (LS) mean diff,	95,00% CI of diff,	Significant?	Summary	Adjusted P Value
siControl - siAKAP9										siControl - siPcnt										siControl - siAKAP9+Pcnt
-4,5	0.02127	-0,1121 to 0,1546	No	ns	>0,9999					-4,5	0.1062	-0,03506 to 0,2474	No	ns	0.5487					-4,5	0.225	0,08740 to 0,3626	Yes	****	<0,0001
-4	-0.01014	-0,1435 to 0,1232	No	ns	>0,9999					-4	0.04741	-0,09382 to 0,1886	No	ns	>0,9999					-4	0.1569	0,01932 to 0,2945	Yes	*	0.01
-3,5	0.01361	-0,1197 to 0,1470	No	ns	>0,9999					-3,5	0.07171	-0,06952 to 0,2129	No	ns	>0,9999					-3,5	0.1529	0,01532 to 0,2905	Yes	*	0.0142
-3	-0.03567	-0,1690 to 0,09769	No	ns	>0,9999					-3	0.02924	-0,1120 to 0,1705	No	ns	>0,9999					-3	0.1213	-0,01628 to 0,2589	No	ns	0.168
-2,5	-0.045	-0,1784 to 0,08835	No	ns	>0,9999					-2,5	0.008795	-0,1324 to 0,1500	No	ns	>0,9999					-2,5	0.1229	-0,01471 to 0,2605	No	ns	0.1503
-2	-0.03278	-0,1661 to 0,1006	No	ns	>0,9999					-2	0.007745	-0,1335 to 0,1490	No	ns	>0,9999					-2	0.1537	0,01614 to 0,2913	Yes	*	0.0133
-1,5	-0.03623	-0,1696 to 0,09712	No	ns	>0,9999					-1,5	-0.006607	-0,1478 to 0,1346	No	ns	>0,9999					-1,5	0.1718	0,03420 to 0,3094	Yes	**	0.0026
-1	-0.02684	-0,1602 to 0,1065	No	ns	>0,9999					-1	-0.001218	-0,1424 to 0,1400	No	ns	>0,9999					-1	0.2052	0,06758 to 0,3428	Yes	****	<0,0001
-0,5	-0.0827	-0,2161 to 0,05066	No	ns	>0,9999					-0,5	-0.04869	-0,1899 to 0,09254	No	ns	>0,9999					-0,5	0.3076	0,1700 to 0,4452	Yes	****	<0,0001
0	-0.04993	-0,1833 to 0,08342	No	ns	>0,9999					0	0.1314	-0,009861 to 0,2726	No	ns	0.1038					0	0.4253	0,2877 to 0,5629	Yes	****	<0,0001
0,5	0.0588	-0,07455 to 0,1922	No	ns	>0,9999					0,5	0.0866	-0,05463 to 0,2278	No	ns	>0,9999					0,5	0.3254	0,1878 to 0,4630	Yes	****	<0,0001
1	0.07947	-0,05388 to 0,2128	No	ns	>0,9999					1	0.01453	-0,1267 to 0,1558	No	ns	>0,9999					1	0.1371	-0,0004907 to 0,2747	No	ns	0.052
1,5	0.05842	-0,07493 to 0,1918	No	ns	>0,9999					1,5	-0.004059	-0,1453 to 0,1372	No	ns	>0,9999					1,5	0.07492	-0,06267 to 0,2125	No	ns	>0,9999
2	0.02069	-0,1127 to 0,1540	No	ns	>0,9999					2	0.01336	-0,1279 to 0,1546	No	ns	>0,9999					2	-0.01645	-0,1540 to 0,1211	No	ns	>0,9999
2,5	0.003393	-0,1300 to 0,1367	No	ns	>0,9999					2,5	0.004804	-0,1364 to 0,1460	No	ns	>0,9999					2,5	-0.06195	-0,1995 to 0,07564	No	ns	>0,9999
3	-0.03772	-0,1711 to 0,09563	No	ns	>0,9999					3	-0.002924	-0,1442 to 0,1383	No	ns	>0,9999					3	-0.1059	-0,2435 to 0,03171	No	ns	0.471
3,5	-0.05342	-0,1868 to 0,07994	No	ns	>0,9999					3,5	-0.00458	-0,1458 to 0,1367	No	ns	>0,9999					3,5	-0.1044	-0,2420 to 0,03315	No	ns	0.5156
4	-0.05125	-0,1846 to 0,08210	No	ns	>0,9999					4	-0.006347	-0,1476 to 0,1349	No	ns	>0,9999					4	-0.09998	-0,2376 to 0,03761	No	ns	0.6778
4,5	-0.0426	-0,1759 to 0,09076	No	ns	>0,9999					4,5	-0.005425	-0,1467 to 0,1358	No	ns	>0,9999					4,5	-0.08268	-0,2203 to 0,05491	No	ns	>0,9999
5	-0.03402	-0,1674 to 0,09933	No	ns	>0,9999					5	-0.007377	-0,1486 to 0,1339	No	ns	>0,9999					5	-0.07468	-0,2123 to 0,06291	No	ns	>0,9999
5,5	-0.01699	-0,1503 to 0,1164	No	ns	>0,9999					5,5	-0.01093	-0,1522 to 0,1303	No	ns	>0,9999					5,5	-0.08566	-0,2233 to 0,05193	No	ns	>0,9999
6	-0.003981	-0,1373 to 0,1294	No	ns	>0,9999					6	-0.006937	-0,1482 to 0,1343	No	ns	>0,9999					6	-0.08744	-0,2250 to 0,05015	No	ns	>0,9999
6,5	0.001462	-0,1319 to 0,1348	No	ns	>0,9999					6,5	-0.003279	-0,1445 to 0,1380	No	ns	>0,9999					6,5	-0.07149	-0,2091 to 0,06610	No	ns	>0,9999
7	0.001452	-0,1319 to 0,1348	No	ns	>0,9999					7	0.001469	-0,1398 to 0,1427	No	ns	>0,9999					7	-0.06262	-0,2002 to 0,07497	No	ns	>0,9999
7,5	0.008335	-0,1250 to 0,1417	No	ns	>0,9999					7,5	0.008214	-0,1330 to 0,1494	No	ns	>0,9999					7,5	-0.0549	-0,1925 to 0,08269	No	ns	>0,9999
8	0.01055	-0,1228 to 0,1439	No	ns	>0,9999					8	0.002017	-0,1392 to 0,1432	No	ns	>0,9999					8	-0.05933	-0,1969 to 0,07826	No	ns	>0,9999
8,5	0.01564	-0,1177 to 0,1490	No	ns	>0,9999					8,5	0.001329	-0,1399 to 0,1426	No	ns	>0,9999					8,5	-0.06534	-0,2029 to 0,07225	No	ns	>0,9999
9	0.0194	-0,1140 to 0,1528	No	ns	>0,9999					9	-0.0007389	-0,1420 to 0,1405	No	ns	>0,9999					9	-0.06025	-0,1978 to 0,07734	No	ns	>0,9999
9,5	0.03016	-0,1032 to 0,1635	No	ns	>0,9999					9,5	-0.002185	-0,1434 to 0,1390	No	ns	>0,9999					9,5	-0.04885	-0,1864 to 0,08874	No	ns	>0,9999
10	0.02889	-0,1045 to 0,1622	No	ns	>0,9999					10	-0.002436	-0,1437 to 0,1388	No	ns	>0,9999					10	-0.05076	-0,1883 to 0,08683	No	ns	>0,9999
10.5	0.03452	-0,09883 to 0,1679	No	ns	>0,9999					10.5	0.00556	-0,1357 to 0,1468	No	ns	>0,9999					10.5	-0.03834	-0,1759 to 0,09925	No	ns	>0,9999
Test details	Predicted (LS) mean 1	Predicted (LS) mean 2	Predicted (LS) mean diff,	SE of diff,	N1	N2	t	DF		Test details	Predicted (LS) mean 1	Predicted (LS) mean 2	Predicted (LS) mean diff,	SE of diff,	N1	N2	t	DF		Test details	Predicted (LS) mean 1	Predicted (LS) mean 2	Predicted (LS) mean diff,	SE of diff,	N1	N2	t	DF
siControl - siAKAP9										siControl - siPcnt										siControl - siAKAP9+Pcnt
-4,5	1.026	1.004	0.02127	0.04224	37	53	0.5035	2728		-4,5	1.026	0.9194	0.1062	0.04473	37	34	2.374	2139		-4,5	1.026	0.8005	0.225	0.04358	37	43	5.163	2418
-4	0.9381	0.9482	-0.01014	0.04224	37	53	0.24	2728		-4	0.9381	0.8907	0.04741	0.04473	37	34	1.06	2139		-4	0.9381	0.7812	0.1569	0.04358	37	43	3.601	2418
-3,5	0.9274	0.9138	0.01361	0.04224	37	53	0.3223	2728		-3,5	0.9274	0.8557	0.07171	0.04473	37	34	1.603	2139		-3,5	0.9274	0.7745	0.1529	0.04358	37	43	3.509	2418
-3	0.882	0.9177	-0.03567	0.04224	37	53	0.8443	2728		-3	0.882	0.8528	0.02924	0.04473	37	34	0.6537	2139		-3	0.882	0.7607	0.1213	0.04358	37	43	2.784	2418
-2,5	0.8748	0.9198	-0.045	0.04224	37	53	1.065	2728		-2,5	0.8748	0.866	0.008795	0.04473	37	34	0.1966	2139		-2,5	0.8748	0.7519	0.1229	0.04358	37	43	2.82	2418
-2	0.9076	0.9404	-0.03278	0.04224	37	53	0.776	2728		-2	0.9076	0.8999	0.007745	0.04473	37	34	0.1732	2139		-2	0.9076	0.7539	0.1537	0.04358	37	43	3.527	2418
-1,5	0.9809	1.017	-0.03623	0.04224	37	53	0.8577	2728		-1,5	0.9809	0.9875	-0.006607	0.04473	37	34	0.1477	2139		-1,5	0.9809	0.8091	0.1718	0.04358	37	43	3.942	2418
-1	1.093	1.12	-0.02684	0.04224	37	53	0.6354	2728		-1	1.093	1.095	-0.001218	0.04473	37	34	0.02724	2139		-1	1.093	0.8882	0.2052	0.04358	37	43	4.708	2418
-0,5	1.473	1.556	-0.0827	0.04224	37	53	1.958	2728		-0,5	1.473	1.522	-0.04869	0.04473	37	34	1.089	2139		-0,5	1.473	1.165	0.3076	0.04358	37	43	7.058	2418
0	1.799	1.849	-0.04993	0.04224	37	53	1.182	2728		0	1.799	1.668	0.1314	0.04473	37	34	2.937	2139		0	1.799	1.374	0.4253	0.04358	37	43	9.76	2418
0,5	1.671	1.612	0.0588	0.04224	37	53	1.392	2728		0,5	1.671	1.584	0.0866	0.04473	37	34	1.936	2139		0,5	1.671	1.345	0.3254	0.04358	37	43	7.467	2418
1	1.373	1.294	0.07947	0.04224	37	53	1.881	2728		1	1.373	1.359	0.01453	0.04473	37	34	0.325	2139		1	1.373	1.236	0.1371	0.04358	37	43	3.146	2418
1,5	1.281	1.222	0.05842	0.04224	37	53	1.383	2728		1,5	1.281	1.285	-0.004059	0.04473	37	34	0.09076	2139		1,5	1.281	1.206	0.07492	0.04358	37	43	1.719	2418
2	1.164	1.143	0.02069	0.04224	37	53	0.4898	2728		2	1.164	1.151	0.01336	0.04473	37	34	0.2988	2139		2	1.164	1.18	-0.01645	0.04358	37	43	0.3774	2418
2,5	1.112	1.109	0.003393	0.04224	37	53	0.08033	2728		2,5	1.112	1.107	0.004804	0.04473	37	34	0.1074	2139		2,5	1.112	1.174	-0.06195	0.04358	37	43	1.422	2418
3	1.043	1.081	-0.03772	0.04224	37	53	0.8929	2728		3	1.043	1.046	-0.002924	0.04473	37	34	0.06538	2139		3	1.043	1.149	-0.1059	0.04358	37	43	2.429	2418
3,5	0.997	1.05	-0.05342	0.04224	37	53	1.265	2728		3,5	0.997	1.002	-0.00458	0.04473	37	34	0.1024	2139		3,5	0.997	1.101	-0.1044	0.04358	37	43	2.396	2418
4	0.9795	1.031	-0.05125	0.04224	37	53	1.213	2728		4	0.9795	0.9858	-0.006347	0.04473	37	34	0.1419	2139		4	0.9795	1.079	-0.09998	0.04358	37	43	2.294	2418
4,5	0.9537	0.9963	-0.0426	0.04224	37	53	1.008	2728		4,5	0.9537	0.9591	-0.005425	0.04473	37	34	0.1213	2139		4,5	0.9537	1.036	-0.08268	0.04358	37	43	1.897	2418
5	0.9422	0.9762	-0.03402	0.04224	37	53	0.8054	2728		5	0.9422	0.9496	-0.007377	0.04473	37	34	0.1649	2139		5	0.9422	1.017	-0.07468	0.04358	37	43	1.714	2418
5,5	0.921	0.938	-0.01699	0.04224	37	53	0.4022	2728		5,5	0.921	0.932	-0.01093	0.04473	37	34	0.2444	2139		5,5	0.921	1.007	-0.08566	0.04358	37	43	1.966	2418
6	0.9074	0.9114	-0.003981	0.04224	37	53	0.09423	2728		6	0.9074	0.9143	-0.006937	0.04473	37	34	0.1551	2139		6	0.9074	0.9948	-0.08744	0.04358	37	43	2.006	2418
6,5	0.9029	0.9014	0.001462	0.04224	37	53	0.03461	2728		6,5	0.9029	0.9062	-0.003279	0.04473	37	34	0.07331	2139		6,5	0.9029	0.9744	-0.07149	0.04358	37	43	1.64	2418
7	0.8877	0.8863	0.001452	0.04224	37	53	0.03437	2728		7	0.8877	0.8862	0.001469	0.04473	37	34	0.03284	2139		7	0.8877	0.9503	-0.06262	0.04358	37	43	1.437	2418
7,5	0.8859	0.8776	0.008335	0.04224	37	53	0.1973	2728		7,5	0.8859	0.8777	0.008214	0.04473	37	34	0.1837	2139		7,5	0.8859	0.9408	-0.0549	0.04358	37	43	1.26	2418
8	0.8713	0.8607	0.01055	0.04224	37	53	0.2498	2728		8	0.8713	0.8693	0.002017	0.04473	37	34	0.04511	2139		8	0.8713	0.9306	-0.05933	0.04358	37	43	1.361	2418
8,5	0.8619	0.8462	0.01564	0.04224	37	53	0.3702	2728		8,5	0.8619	0.8605	0.001329	0.04473	37	34	0.02972	2139		8,5	0.8619	0.9272	-0.06534	0.04358	37	43	1.499	2418
9	0.8548	0.8354	0.0194	0.04224	37	53	0.4592	2728		9	0.8548	0.8555	-0.0007389	0.04473	37	34	0.01652	2139		9	0.8548	0.915	-0.06025	0.04358	37	43	1.383	2418
9,5	0.85	0.8199	0.03016	0.04224	37	53	0.7139	2728		9,5	0.85	0.8522	-0.002185	0.04473	37	34	0.04885	2139		9,5	0.85	0.8989	-0.04885	0.04358	37	43	1.121	2418
10	0.8436	0.8147	0.02889	0.04224	37	53	0.684	2728		10	0.8436	0.846	-0.002436	0.04473	37	34	0.05446	2139		10	0.8436	0.8943	-0.05076	0.04358	37	43	1.165	2418
10.5	0.8419	0.8074	0.03452	0.04224	37	53	0.8171	2728		10.5	0.8419	0.8363	0.00556	0.04473	37	34	0.1243	2139		10.5	0.8419	0.8802	-0.03834	0.04358	37	43	0.8796	2418

## Sheet: Raw_Figure 5B
	Distance from nuclear edge (µm)
	-4.5	-4	-3.5	-3	-2.5	-2	-1.5	-1	-0.5	0	0.5	1	1.5	2	2.5	3	3.5	4	4.5	5	5.5	6	6.5	7	7.5	8	8.5	9	9.5	10	10.5
siControl	0.77523	0.808038	0.802697	0.746335	0.732405	0.752473	0.860846	0.978541	1.56549	1.88129	2.08426	1.80017	1.63965	1.29594	1.21179	1.10539	1.04038	0.992619	0.92592	0.882782	0.809668	0.811448	0.847284	0.870328	0.865095	0.845585	0.807928	0.772966	0.786982	0.805169	0.817528
	1.10857	1.04447	1.05111	1.02772	0.947108	0.899783	0.977902	1.08972	1.41528	1.52776	1.47524	1.45836	1.37241	1.15387	1.08246	1.01185	0.951889	0.955158	0.978211	0.973773	0.948572	0.925075	0.902735	0.85833	0.851353	0.833136	0.844843	0.874909	0.87243	0.871699	0.861425
	0.780072	0.780864	0.759605	0.770738	0.792962	0.817713	0.875949	0.947692	1.35838	1.55325	1.75066	1.65786	1.55027	1.15873	1.09088	1.01025	0.925166	0.893168	0.892178	0.906223	0.908285	0.912693	0.918517	0.88656	0.870941	0.841662	0.875623	0.890928	0.91456	0.933384	1.01952
	0.740562	0.711309	0.678368	0.663009	0.67004	0.752623	0.850121	0.93061	1.28436	1.50655	1.84599	1.66963	1.53882	1.27846	1.14845	1.07661	1.08334	1.05144	1.03381	1.03183	0.978435	0.943299	0.893344	0.898176	0.911025	0.884764	0.859742	0.834393	0.787622	0.776828	0.757618
	1.03074	1.05069	1.03356	0.913213	0.868099	0.918276	1.04171	1.19034	1.6136	1.76642	1.66697	1.39666	1.3156	1.1319	1.04794	0.98002	0.924065	0.908568	0.875624	0.859673	0.847272	0.829912	0.83764	0.843159	0.848073	0.857842	0.875931	0.886411	0.892775	0.923404	0.936206
	1.19536	1.18085	1.18132	1.15123	1.08428	1.01514	1.02338	1.06813	1.29585	1.44586	1.63477	1.32005	1.26863	1.21792	1.1678	1.01438	0.969415	0.977799	0.958562	0.932612	0.949962	0.890735	0.860841	0.824882	0.841762	0.854938	0.811103	0.804621	0.792004	0.804069	0.803937
	0.808528	0.855324	0.868229	0.754823	0.714449	0.708171	0.804444	0.937512	1.48795	1.78344	1.98175	1.90549	1.86125	1.69728	1.61141	1.45637	1.25783	1.19314	1.01437	0.940028	0.81654	0.723796	0.727872	0.749623	0.751242	0.680591	0.659898	0.660666	0.695347	0.714705	0.693405
	0.876343	1.08225	1.1443	1.23372	1.30204	1.41227	1.4275	1.4873	1.50151	1.50469	1.52281	1.31035	1.26843	1.2413	1.18623	1.06836	1.01792	1.01914	0.954223	0.928082	0.903713	0.889349	0.891673	0.861952	0.859926	0.815146	0.799466	0.792422	0.765191	0.757524	0.753948
	0.647598	0.641988	0.718122	0.794033	0.828251	0.864112	0.848243	0.858951	1.1025	1.21147	1.2634	1.248	1.23889	1.2033	1.15154	1.04845	1.01644	1.00456	0.944121	0.931712	0.964786	1.10442	1.16565	1.12495	1.06685	0.97711	0.953273	0.918208	0.814192	0.802198	0.815518
	1.10641	1.02441	1.03266	1.08953	1.07887	0.995712	1.00954	1.01924	1.14576	1.30166	1.43007	1.34341	1.32113	1.27854	1.21952	1.11184	1.01628	0.985472	0.986447	1.00265	0.962203	0.924827	0.905329	0.882432	0.877941	0.861365	0.862234	0.8786	0.872798	0.865565	0.82412
	2.02752	0.68873	0.70411	0.708202	0.768205	0.898005	1.10602	1.24527	1.72986	1.98737	2.02752	1.61519	1.53501	1.33319	1.21104	1.05781	0.98287	0.985221	0.984508	0.965687	0.885596	0.869606	0.852658	0.835959	0.811756	0.784715	0.753814	0.747041	0.747243	0.75229	0.754771
	1.74008	1.74008	1.74008	0.545665	0.599934	0.729133	0.854631	0.938669	1.20354	1.43936	1.74008	1.56841	1.49599	1.28388	1.17677	1.07905	1.03179	0.997655	0.943964	0.922858	0.902483	0.893913	0.896491	0.876987	0.883789	0.908839	0.914693	0.909552	0.893566	0.879242	0.876353
	0.842613	0.745957	0.739229	0.775043	0.794431	0.780517	0.845807	0.916249	1.08374	1.24427	1.47113	1.31937	1.28786	1.20172	1.13258	1.01441	1.07457	1.1495	1.07357	1.0164	0.973601	0.923804	0.919812	0.928883	0.960011	0.928281	0.934641	0.943177	0.902331	0.866618	0.867959
	1.0824	1.09811	1.06171	0.96642	0.912288	0.902974	0.972853	1.07434	1.5719	1.86459	2.25486	1.64708	1.37906	1.06015	0.965256	0.83412	0.801522	0.813409	0.859926	0.849917	0.854967	0.889167	0.909928	0.945601	0.901517	0.864193	0.868708	0.856076	0.848887	0.804369	0.758049
	0.566306	0.625807	0.658202	0.729628	0.789333	0.893276	0.915953	0.925807	1.15488	1.31835	1.36626	1.25872	1.22929	1.15176	1.10594	1.06885	1.03317	1.03512	1.05399	1.05568	1.02515	1.02187	0.987712	0.923118	0.912478	0.894043	0.901241	0.904393	0.904668	0.912877	0.931784
	1.24095	1.21088	1.18542	1.11188	1.07496	1.05123	0.981136	0.939612	0.982489	1.06395	1.24095	1.16721	1.0847	0.946804	0.863604	0.831339	0.851817	0.858761	0.899844	0.952783	0.978036	0.986368	0.998846	0.981332	0.987762	1.00294	1.01524	1.0004	1.0218	1.04046	1.07968
	0.84731	0.857124	0.852362	0.917358	0.944159	1.0164	1.0989	1.20059	1.57896	1.77895	1.75363	1.34101	1.21426	0.991724	0.945425	0.915031	0.936183	0.946036	0.927701	0.962349	0.995566	0.976536	0.95817	0.910317	0.895754	0.86522	0.850218	0.841871	0.828079	0.824402	0.866848
	0.883038	0.839086	0.84764	0.878849	0.898954	0.935661	1.02312	1.05992	1.21031	1.32457	1.62079	1.48899	1.39969	1.2249	1.15837	1.0741	1.02016	1.02348	0.976157	0.94089	0.909081	0.901657	0.898235	0.880446	0.887565	0.889883	0.857711	0.866904	0.880621	0.871761	0.847505
	1.75685	1.8688	1.92071	1.94271	1.9101	1.86317	1.86369	1.82398	1.75187	1.78696	1.77894	1.34796	1.21449	1.05795	1.00429	0.888529	0.85118	0.842926	0.840797	0.830064	0.793078	0.758191	0.762059	0.738541	0.723789	0.684828	0.646364	0.647581	0.666413	0.659328	0.649505
	1.03732	1.0783	1.18479	1.08772	1.02181	1.02488	0.960724	0.84572	0.939012	1.09618	1.31359	1.32152	1.33686	1.20132	1.1174	0.986749	0.93354	0.908193	0.877958	0.885411	0.92613	0.983479	0.96804	0.946591	0.954078	0.965735	0.940829	0.932246	0.9498	0.987322	0.984997
	0.75773	0.806086	0.803482	0.776899	0.785307	0.85896	1.04061	1.27279	1.97041	2.21096	1.83221	1.30045	1.16184	0.951886	0.91504	0.861513	0.879182	0.896787	0.874611	0.881089	0.846978	0.854318	0.871877	0.904124	0.921941	0.959557	0.958815	0.945429	0.887344	0.864418	0.826505
	1.08472	1.0236	0.982306	0.943134	0.964479	1.00348	1.08802	1.19076	1.71575	1.84538	1.45182	1.11514	1.04892	0.989966	0.960984	0.935882	0.881021	0.84714	0.828163	0.812013	0.813956	0.843685	0.825216	0.823389	0.840904	0.853604	0.90238	0.936113	1.06132	1.08938	1.13025
	1.70596	0.742598	0.791971	0.829824	0.852425	0.92842	1.0651	1.18711	1.89085	2.1182	1.70596	1.33024	1.2399	1.03956	0.991593	0.945783	0.969515	0.948886	0.976932	0.972212	0.924817	0.907135	0.905776	0.865804	0.843591	0.827348	0.850151	0.865994	0.868637	0.847778	0.822368
	0.91059	0.994071	1.01143	1.02668	1.03985	1.1559	1.31587	1.51947	2.0805	2.1371	1.61234	1.21148	1.16997	1.12118	1.09892	1.04379	0.961286	0.931111	0.930588	0.92259	0.850812	0.798804	0.783697	0.771307	0.780415	0.802763	0.850171	0.845071	0.808031	0.815618	0.805316
	0.476399	0.499901	0.542254	0.592626	0.636379	0.746177	0.81999	0.971851	1.76701	2.11477	1.87971	1.25897	1.18476	1.23497	1.26233	1.2608	1.1408	1.03354	0.918143	0.913087	0.917397	0.872274	0.85135	0.871384	0.882728	0.829416	0.829121	0.836683	0.848633	0.841982	0.836148
	0.610492	0.63854	0.653745	0.691214	0.70772	0.747572	0.868583	0.985677	1.38847	1.53717	1.45661	1.29403	1.23937	1.16127	1.07394	0.991947	1.02253	1.00915	0.927489	0.930572	0.983607	1.05154	1.06102	1.02007	0.999704	0.962695	0.942163	0.939223	0.925262	0.888858	0.865959
	0.873484	0.782096	0.752565	0.727411	0.716871	0.712005	0.803058	0.967958	1.33981	1.4152	1.43593	1.57644	1.6287	1.73747	1.76988	1.55505	1.21803	1.13992	1.06159	1.02327	0.942446	0.8875	0.862624	0.811522	0.777125	0.735701	0.71676	0.708608	0.68265	0.679715	0.685446
siAKAP9	0.712367	0.781902	0.826901	0.858978	0.90798	0.952292	0.886315	0.925409	1.28351	1.45514	1.51	1.22201	1.18455	1.13832	1.12304	1.08454	1.0342	1.0152	0.909553	0.896321	0.894302	0.947809	0.973166	1.01083	1.00671	0.944776	0.875046	0.856413	0.859813	0.871219	0.89737
	0.662395	0.679888	0.657601	0.636128	0.625196	0.6602	0.73542	0.805184	1.17326	1.47534	1.78415	1.62502	1.56532	1.48087	1.39975	1.32737	1.22046	1.14424	1.01706	0.985665	0.941426	0.888818	0.87883	0.846445	0.825951	0.820192	0.828409	0.841445	0.842515	0.813187	0.753115
	1.12246	1.16348	1.19403	1.28227	1.25425	1.26572	1.4681	1.58803	1.97662	2.20571	1.66696	1.11346	1.00862	0.906917	0.934551	1.04639	1.08668	1.12302	1.08004	1.00533	0.916572	0.868422	0.837834	0.81448	0.799504	0.795841	0.765903	0.753099	0.747623	0.744434	0.704343
	0.938402	0.8434	0.834378	0.90971	0.943176	0.886883	0.890521	0.968278	1.239	1.4064	1.26109	1.10629	1.07826	1.04125	1.01666	0.999502	0.973496	0.976049	0.947116	0.94814	0.996582	1.07379	1.09939	1.04451	1.01281	0.971509	0.943813	0.918516	0.887921	0.884244	0.894771
	0.92769	1.02879	1.03835	0.947958	0.994198	1.0096	1.03925	1.11892	1.62794	1.86871	1.78275	1.36938	1.24378	1.04335	1.01646	1.12197	1.18085	1.14458	1.08041	1.01962	0.940197	0.897118	0.879742	0.858117	0.844224	0.797463	0.783288	0.784959	0.77003	0.763132	0.748416
	1.10976	0.957653	0.954179	0.975685	1.06525	1.0977	1.24184	1.42322	2.29788	2.78164	2.45714	1.5285	1.38668	1.1141	0.994195	0.885928	0.869261	0.878184	0.882674	0.874066	0.803487	0.757732	0.756959	0.758155	0.768854	0.748942	0.716167	0.709536	0.68804	0.682519	0.675711
	1.16664	1.11021	1.03327	1.0097	1.00339	0.966756	1.05346	1.14709	1.47817	1.60086	1.43014	1.2577	1.18504	1.13804	1.12061	1.0996	1.09369	1.07691	0.973115	0.936936	0.922171	0.899362	0.903138	0.93735	0.915304	0.888779	0.851992	0.838878	0.828065	0.843759	0.858593
	1.09197	1.35761	1.45828	1.45655	1.51699	1.60458	1.6288	1.65986	1.93968	2.02759	1.81138	1.29483	1.22004	1.05737	1.00129	0.984989	0.967234	0.992902	1.07923	1.08689	0.998116	0.880449	0.837868	0.75415	0.733823	0.690984	0.641344	0.636302	0.627105	0.618949	0.621419
	0.909518	0.832272	0.810937	0.81643	0.807826	0.834149	0.887881	0.955225	1.4161	1.67611	1.71087	1.38415	1.3395	1.18263	1.18129	1.13514	1.05613	1.05364	1.05093	1.00995	0.939605	0.879821	0.872811	0.82788	0.823607	0.813867	0.840485	0.851733	0.867481	0.892369	0.878014
	1.01493	1.11071	1.16634	1.10816	1.05377	0.975254	0.991884	1.07153	1.41715	1.58772	1.39455	1.16116	1.1342	1.14497	1.14375	1.0855	1.03568	1.03127	1.00835	1.00836	1.01258	1.0331	1.00935	0.946125	0.908679	0.874356	0.845479	0.839481	0.783082	0.757196	0.708837
	0.99941	0.936358	0.949522	1.01579	1.03419	1.10634	1.11105	1.10004	1.58606	1.79186	1.6479	1.45069	1.40349	1.22727	1.15387	1.08019	1.08351	1.07508	1.01457	0.949363	0.927726	0.909452	0.886439	0.830648	0.827671	0.850175	0.818851	0.805132	0.758534	0.736499	0.725663
	1.16564	1.15664	1.11996	1.09522	1.11672	1.0435	1.09514	1.24676	1.66089	1.80465	1.46149	1.16685	1.15824	1.07328	1.02936	1.08003	1.19013	1.13293	0.996828	0.942922	0.877451	0.853368	0.83687	0.837804	0.836048	0.857492	0.84944	0.850091	0.83568	0.840939	0.864205
	1.34667	1.30532	1.26032	1.23008	1.20528	1.18128	1.30829	1.43169	2.08031	2.32471	1.6942	1.1524	1.04816	1.00271	1.00961	1.00203	0.969285	0.941796	0.911645	0.879941	0.851148	0.837239	0.837082	0.823783	0.824527	0.808102	0.80408	0.779039	0.761592	0.758353	0.732817
	0.966313	0.956027	0.920889	0.902802	0.89221	0.891934	0.916585	0.97659	1.36332	1.53766	1.42056	1.21296	1.23966	1.28775	1.26514	1.15752	1.12407	1.06797	0.965681	0.943492	0.879617	0.877788	0.898278	0.918496	0.917429	0.900191	0.900212	0.891132	0.853589	0.847012	0.844784
	0.773788	0.778642	0.740264	0.790974	0.789536	0.8057	0.857141	0.934094	1.40796	1.64674	1.50624	1.15698	1.11796	1.10515	1.10227	1.08626	1.04598	1.04116	1.04573	1.06712	1.06358	1.01693	1.0278	1.01595	0.976042	0.909005	0.855422	0.853493	0.81766	0.805847	0.820332
	0.848067	0.88105	0.930956	0.876557	0.845113	0.863349	0.912085	0.950752	1.2527	1.4301	1.43825	1.20109	1.1589	1.05906	1.02821	0.940547	0.891608	0.873886	0.911706	0.934553	0.953219	0.998645	1.00558	1.00842	1.01162	1.0016	0.937654	0.915816	0.929659	0.948621	0.982738
	1.09009	1.07316	1.00144	0.976365	0.983339	0.983474	1.07267	1.12176	1.33848	1.48102	1.34942	1.17233	1.11803	1.11803	1.15735	1.19001	1.15217	1.12809	1.08998	1.06048	1.02065	0.928077	0.90045	0.859785	0.853344	0.855345	0.827118	0.825039	0.814933	0.812123	0.794017
	0.97472	1.0086	1.08011	1.16705	1.17429	1.36991	1.25501	1.29325	1.59513	1.77059	1.56586	1.25593	1.17826	1.02207	0.988549	0.914282	0.900466	0.887257	0.878508	0.892131	0.868875	0.845503	0.843243	0.881096	0.888791	0.853184	0.848308	0.872578	0.901775	0.931595	0.950584
	1.13431	1.35235	1.38047	1.17379	1.12123	1.04969	1.10477	1.23267	1.89542	2.05686	1.45611	1.28331	1.28828	1.24529	1.21218	1.19443	1.18931	1.11726	0.994486	0.993108	0.865622	0.823807	0.794412	0.76587	0.752394	0.758616	0.792749	0.815581	0.824059	0.805748	0.740571
	2.72351	2.52913	2.10451	1.63338	1.49535	1.28807	1.27023	1.33617	1.65565	1.78999	1.49269	1.21355	1.17866	1.12872	1.13769	1.07852	0.971172	0.951434	0.87882	0.86012	0.827094	0.822255	0.797286	0.744089	0.718256	0.702841	0.707002	0.696787	0.672865	0.661301	0.652029
	0.92016	0.93574	0.994877	0.954237	1.00298	1.04877	1.20875	1.31889	1.78661	2.067	1.61937	1.18523	1.09489	0.971142	0.978622	0.994388	0.983658	0.984384	0.943713	0.946952	0.913653	0.894572	0.896883	0.874198	0.875398	0.88636	0.864144	0.861937	0.86171	0.855013	0.838695
	0.913675	0.866627	0.837676	0.897385	0.912314	0.881138	0.879623	0.897022	1.23493	1.42562	1.474	1.29909	1.19771	1.16782	1.21457	1.1568	1.06712	1.03403	1.01812	1.02071	1.07775	1.05863	1.01971	0.932803	0.924279	0.899017	0.856689	0.85174	0.808903	0.792436	0.788399
	0.800542	0.852193	0.870022	0.820883	0.824853	0.83849	0.925622	0.953054	1.29924	1.52459	1.4898	1.27369	1.26572	1.29229	1.26029	1.33229	1.32112	1.2852	1.14662	1.06981	0.961355	0.89223	0.882329	0.838336	0.810809	0.783113	0.786274	0.795315	0.815007	0.817138	0.813946
	1.16321	1.10008	1.10943	1.16217	1.20571	1.36386	1.44062	1.55633	2.05937	2.28561	1.63087	1.15014	1.05915	1.00516	1.00834	1.00251	0.926859	0.905072	0.871895	0.871877	0.851765	0.863687	0.865037	0.885053	0.892081	0.899406	0.863132	0.836701	0.77226	0.739558	0.704289
	0.789786	0.784598	0.79917	0.839842	0.847053	0.824559	0.844503	0.868007	1.0568	1.19488	1.33124	1.31744	1.29748	1.13167	1.11539	1.11886	1.17194	1.15493	1.15176	1.13859	1.05618	0.996771	0.966528	0.927529	0.915275	0.888761	0.866091	0.8555	0.85742	0.865757	0.855591
	1.06882	0.909709	0.881327	0.794631	0.886463	1.10523	1.19025	1.28218	1.59674	1.69382	1.59318	1.45667	1.41482	1.29419	1.23189	1.13356	1.04966	1.01771	0.921847	0.906197	0.890848	0.823067	0.814067	0.843146	0.852626	0.876648	0.861235	0.826138	0.792921	0.793679	0.797319
	0.948779	0.95053	0.95583	0.972531	0.968398	1.03746	1.11887	1.18223	1.42016	1.56484	1.70682	1.50481	1.46135	1.38419	1.27636	1.11592	0.965326	0.91171	0.856068	0.866899	0.858551	0.843805	0.830176	0.834662	0.849124	0.871085	0.852704	0.854001	0.819532	0.821785	0.833784
	0.969066	0.873214	0.872572	0.927905	0.898232	0.935375	1.13547	1.31663	2.09126	2.23449	1.48283	1.12302	1.05239	0.966424	0.960363	0.939924	0.92324	0.925763	0.917068	0.922446	0.95841	1.04437	1.02892	0.965141	0.934551	0.881812	0.873067	0.858396	0.804723	0.804938	0.811991
	1.00871	0.919675	0.963198	1.01804	1.02651	1.12641	1.26873	1.40039	1.85095	1.85587	1.4897	1.4001	1.31328	1.12556	1.07468	1.07093	1.09661	1.09795	1.05492	1.03762	1.02426	0.884981	0.829962	0.794492	0.767801	0.757136	0.744507	0.735319	0.725899	0.737691	0.74066
	0.881417	0.866593	0.86179	0.981473	1.05474	1.14719	1.1492	1.22459	1.84673	2.05885	1.36494	1.04592	0.997505	1.03144	1.0611	1.09216	1.0799	1.08957	1.09726	1.06857	0.989926	0.951516	0.910719	0.82278	0.814976	0.780399	0.782458	0.7705	0.76537	0.761556	0.78098
	0.783962	0.865167	0.852292	0.856363	0.884352	0.950495	0.995386	1.09273	1.33869	1.46328	1.27459	1.17144	1.19762	1.31002	1.30137	1.26576	1.07906	1.0418	1.00033	0.963253	0.896248	0.911898	0.925979	0.900644	0.871009	0.859956	0.861487	0.86373	0.918576	0.948242	0.90062
	1.21823	1.1279	1.0296	0.918951	0.92246	1.01727	1.18845	1.38077	2.11444	2.21814	1.75042	1.28436	1.15053	0.975868	0.95348	0.939793	0.920985	0.907988	0.920909	0.941533	0.903681	0.885341	0.876454	0.839559	0.82523	0.80409	0.812394	0.801015	0.799856	0.7863	0.781149
	0.778884	0.808688	0.804969	0.787715	0.798588	0.873764	1.04548	1.28846	2.92389	3.6208	2.63056	1.7959	1.57578	1.24221	1.06455	0.863692	0.793893	0.798581	0.791092	0.77986	0.789738	0.783979	0.767257	0.700583	0.687855	0.695353	0.682066	0.670797	0.645236	0.6363	0.625103
	1.25326	1.2886	1.18184	1.12433	1.19293	1.27079	1.49164	1.71024	2.06849	2.11216	1.70367	1.44254	1.40792	1.20122	1.12205	1.00488	0.966859	0.970439	0.92848	0.900674	0.814401	0.770739	0.74987	0.741567	0.733439	0.711643	0.727971	0.722403	0.716611	0.707786	0.73966
	0.894035	0.853011	0.803464	0.822175	0.943262	0.962077	1.03284	1.12521	1.63154	1.84642	1.48263	1.17827	1.16043	1.1585	1.14845	1.02733	0.901674	0.877339	0.864959	0.864909	0.874276	0.900394	0.910957	0.921435	0.884546	0.874171	0.894722	0.890161	0.906907	0.939431	1.01244
	0.905667	0.896168	0.854327	0.80694	0.798968	0.83782	0.930208	1.19621	2.04529	2.03406	1.54852	1.14539	1.0799	0.91271	0.901356	1.02975	1.04813	1.0636	1.13133	1.08376	1.05937	0.945115	0.885833	0.837933	0.841277	0.821115	0.827819	0.82979	0.828305	0.811364	0.824801
	0.848901	0.870872	0.81198	0.909373	0.975915	1.07096	1.29508	1.44544	1.84267	1.80594	1.47096	1.44425	1.44805	1.45176	1.45773	1.45594	1.27183	1.18195	1.05561	1.01902	0.966311	0.920748	0.884747	0.805168	0.770144	0.709055	0.688819	0.664278	0.605486	0.571758	0.557645
	0.727279	0.731723	0.732281	0.741369	0.733045	0.802528	1.01447	1.16406	1.61155	1.77984	1.42052	1.13503	1.05839	1.01386	1.05558	1.12877	1.17634	1.22029	1.26521	1.22529	1.06205	0.903619	0.86885	0.878406	0.890737	0.848658	0.832653	0.817855	0.780067	0.79366	0.860685
	0.893437	0.727159	0.796892	0.852729	0.860172	0.833443	0.95505	1.13952	1.59593	1.56273	1.27965	1.23791	1.20996	1.15165	1.07809	1.02912	0.980456	0.956539	0.934242	0.943073	0.939538	0.908507	0.937061	0.98458	0.973115	0.92634	0.931471	0.929739	0.962814	0.942962	0.871502
	1.75554	0.506945	0.584515	0.695757	0.738472	0.886686	1.04449	1.19182	1.86474	2.05113	1.75554	1.42689	1.27599	1.12941	1.07927	1.02905	1.0001	1.0545	1.07738	1.02469	0.891136	0.871188	0.85509	0.840025	0.847747	0.890603	0.885375	0.850985	0.803355	0.802751	0.780139
	0.689223	0.716442	0.726875	0.694242	0.687794	0.679698	0.683009	0.752845	1.11162	1.34724	1.54057	1.51865	1.52366	1.34962	1.24664	1.21716	1.19407	1.1365	1.01597	1.0089	1.09914	1.13219	1.09572	1.10128	1.09154	0.944049	0.797336	0.766315	0.707221	0.662925	0.623926
	0.641129	0.701153	0.719693	0.721556	0.71203	0.790817	0.853964	0.974806	1.39947	1.50993	1.44329	1.41985	1.37017	1.31464	1.30123	1.20626	1.15685	1.17694	1.21393	1.18413	0.973624	0.839694	0.804322	0.778885	0.779529	0.789816	0.827802	0.798699	0.806821	0.839408	0.900737
	0.908007	0.741113	0.777931	0.869767	0.917943	0.886781	1.01662	1.18833	2.0065	2.31666	1.76959	1.27967	1.24405	1.07121	0.986689	0.93202	0.973653	0.953591	0.84628	0.834266	0.899174	0.893163	0.907618	0.921989	0.940587	0.921773	0.916903	0.879649	0.803566	0.793795	0.769277
	1.85665	0.594233	0.620264	0.536123	0.531846	0.638681	0.666316	0.655643	0.804856	1.99305	1.85665	1.51924	1.59409	1.59351	1.26587	1.09424	1.00732	0.910029	0.89717	0.839427	0.837162	0.840579	0.838662	0.943524	0.970336	0.958057	0.912786	0.888994	0.876281	0.920948	0.89333
	1.81548	1.81548	0.541408	0.86902	0.788798	0.702548	0.906193	0.875689	1.1382	2.06279	1.81548	1.46252	1.39063	1.38872	1.21796	1.1651	1.12462	1.01446	1.10259	1.19436	1.06813	0.915514	0.831307	0.793812	0.745606	0.792574	0.829093	0.862794	0.85074	0.818709	0.822498
	0.869725	0.75103	0.705425	0.783057	0.710161	0.651571	0.715409	0.876369	1.15693	1.86466	1.76207	1.24261	1.1281	1.09439	1.08749	1.09408	1.09203	1.01194	0.986244	0.914776	0.908382	0.921867	0.900531	0.9217	0.923916	0.895528	0.914741	0.922489	0.952102	0.997224	0.950324
	0.916375	0.945152	0.993173	0.865371	0.787107	0.697904	0.77696	0.900246	1.1889	1.86152	1.55434	1.22562	1.14802	1.05511	0.988742	0.979974	1.11503	1.19342	1.17954	1.02799	0.900295	0.86739	0.87977	0.921755	0.918782	0.931652	0.954033	0.932729	0.914134	0.888048	0.881146
	0.689386	0.832894	0.765868	0.738962	0.666029	0.664154	0.633651	0.718693	0.977158	1.58162	1.64748	1.24489	1.09394	1.00249	0.910735	0.904467	0.904602	0.927683	0.998002	1.01759	0.980773	1.05029	1.07501	1.08712	1.11631	1.06933	1.00513	0.946571	0.935008	0.906359	0.911681
	0.578581	0.656768	0.68861	0.737405	0.669784	0.603898	0.670428	0.856375	1.13626	1.84495	1.52951	1.02213	0.891594	0.8742	0.87843	0.915838	0.855761	0.856131	0.941026	1.06488	1.0963	1.0371	1.05185	1.06868	1.07655	1.07041	1.01842	0.969648	0.97079	0.978405	0.985302
	0.616702	0.606564	0.614663	0.87632	0.729826	0.650532	0.64377	0.735173	1.03584	1.66765	1.63207	1.24498	1.02178	1.04463	1.06597	1.00848	1.05181	1.03388	1.06188	1.05113	1.00778	0.976322	0.987606	0.976943	0.955591	1.01708	1.06215	1.01829	0.930651	0.870491	0.806538
	0.804712	0.700031	0.668283	0.642762	0.528429	0.558216	0.562187	0.701993	0.984804	1.58803	1.55078	1.24256	1.18246	1.15953	1.15273	1.03668	1.0146	1.0055	0.934461	0.944763	0.928002	0.90855	0.99585	1.06448	1.05833	0.99755	0.953135	0.98843	1.00188	0.952327	0.940695
	0.980929	0.95985	0.971166	0.949475	1.01247	0.91056	0.979722	1.07877	1.26309	1.78548	1.6247	1.15494	0.994172	1.00211	1.0415	1.12932	1.09828	1.04693	1.03777	0.988477	0.949221	0.910434	0.926315	0.91321	0.918824	0.898623	0.929398	0.894994	0.869198	0.887534	0.84166
	0.65655	0.6578	0.578312	0.603956	0.700949	0.756075	0.918297	1.03456	1.27808	2.45174	2.35676	1.64822	1.24084	1.20732	1.25867	1.38461	1.32276	1.22924	0.92295	0.777814	0.788027	0.914049	0.898787	0.826717	0.80768	0.824044	0.801609	0.782879	0.770985	0.71287	0.696793
siPcnt	0.716299	0.720371	0.711671	0.709866	0.714776	0.743326	0.790088	0.839587	1.00004	1.13539	1.38607	1.49883	1.52158	1.41877	1.29634	1.13401	1.0212	0.984865	0.945292	0.939236	0.954621	0.935997	0.92782	0.929859	0.930419	0.92731	0.926302	0.92437	0.907238	0.904541	0.899971
	1.5274	1.35213	1.22572	1.09702	1.12546	1.08033	1.07188	1.094	1.33784	1.48273	1.58059	1.32161	1.2203	1.05556	0.996726	0.950896	0.92357	0.897992	0.865145	0.8479	0.837362	0.809736	0.805632	0.838991	0.854807	0.916743	0.933557	0.943798	0.946618	0.922748	0.903485
	1.01644	1.18222	1.20709	1.12115	1.0715	0.956947	1.04478	1.19697	1.70869	1.86466	1.67195	1.30537	1.23546	1.08413	1.03915	0.970199	0.927021	0.936257	0.916503	0.917512	0.888335	0.904548	0.894763	0.864723	0.859592	0.832673	0.843056	0.84471	0.808484	0.794219	0.763637
	1.00933	1.04869	1.00753	1.04172	1.06204	1.13554	1.25917	1.38793	1.59774	1.75951	2.0004	1.62116	1.44305	1.1728	1.09227	0.98035	0.87794	0.846987	0.822519	0.807981	0.790991	0.784481	0.785619	0.776227	0.783894	0.787573	0.806417	0.808113	0.809453	0.803173	0.775883
	1.57715	1.42091	1.29523	1.18204	1.08097	0.97596	0.942712	0.934479	1.12822	1.31524	1.80922	1.47281	1.3345	1.13451	1.10346	1.0582	1.01648	1.0111	0.970397	0.945157	0.916839	0.911378	0.917673	0.867491	0.838539	0.798099	0.763223	0.752657	0.733745	0.721045	0.709396
	1.40053	1.32965	1.3863	1.37468	1.43086	1.41499	1.35114	1.31271	1.31374	1.37055	1.57681	1.36788	1.26886	1.094	1.07097	1.03302	0.983016	0.965479	0.90632	0.877582	0.843282	0.832046	0.821487	0.82752	0.823639	0.837797	0.809697	0.80836	0.819031	0.814822	0.808574
	0.862082	0.876417	0.870529	0.871302	0.895323	0.957964	0.996976	1.04682	1.29913	1.50075	1.89856	1.4674	1.33161	1.13043	1.04753	0.951685	0.906622	0.897076	0.908016	0.886595	0.865514	0.863988	0.858953	0.858473	0.864725	0.870298	0.886683	0.890567	0.919358	0.91585	0.889361
	0.774747	0.792791	0.790142	0.793455	0.804436	0.803908	0.831522	0.882614	1.07582	1.17855	1.31545	1.30163	1.28076	1.27662	1.26045	1.20728	1.19492	1.18964	1.13679	1.10903	1.05103	1.00067	0.986008	0.942565	0.916793	0.890225	0.86621	0.84834	0.836127	0.820511	0.799359
	1.41549	1.41549	0.622945	0.663052	0.699302	0.730568	0.763862	0.771874	0.883264	1.00636	1.41549	1.52899	1.50379	1.35698	1.28724	1.165	1.13164	1.09856	1.03565	1.02415	1.0101	0.97801	0.975464	0.920916	0.902819	0.880349	0.869164	0.858966	0.844556	0.840718	0.833611
	1.41539	0.943154	0.908636	0.929265	0.938656	0.961764	0.990208	1.00693	1.08155	1.17031	1.41539	1.37267	1.29099	1.15303	1.12597	1.08435	1.09801	1.10541	1.05685	1.02233	0.95316	0.924187	0.907996	0.905752	0.887054	0.870251	0.868194	0.854486	0.832205	0.822405	0.830648
	0.470013	0.520279	0.544924	0.556529	0.596851	0.719761	0.77474	0.859682	1.29233	1.47657	1.45611	1.34117	1.3016	1.13882	1.0792	1.05551	1.03216	1.01409	0.940529	0.917731	0.839877	0.839605	0.862023	0.906419	0.939916	1.05162	1.08583	1.02486	1.03349	1.04667	0.985723
	0.960617	1.04002	0.975568	0.906998	0.926652	0.977388	1.14526	1.35673	1.99999	2.16137	1.8378	1.61508	1.52186	1.32383	1.19375	0.994022	0.840965	0.823487	0.834034	0.829918	0.851861	0.788244	0.771842	0.77973	0.763933	0.758353	0.798826	0.801435	0.765571	0.768727	0.772385
	0.584289	0.594961	0.633759	0.757292	0.803181	0.874785	1.10821	1.40944	2.35584	2.53326	2.03832	1.64221	1.51137	1.25665	1.16853	1.0688	0.980986	0.961467	0.95403	0.924824	0.873627	0.829822	0.799265	0.749293	0.736538	0.703377	0.684438	0.698813	0.715211	0.727955	0.756888
	0.769253	0.822282	0.812097	0.853384	0.852687	0.887762	1.00042	1.09914	1.59616	1.94544	2.19735	1.86061	1.77049	1.52088	1.34877	1.05763	0.911626	0.884298	0.837569	0.831549	0.825769	0.806243	0.788453	0.753576	0.760477	0.759038	0.74199	0.751388	0.75202	0.739075	0.727282
	1.02565	0.920585	0.909477	0.86711	0.825282	0.81761	0.876894	0.962579	1.51241	1.77405	1.62376	1.33577	1.24587	1.07509	1.07534	1.05006	0.961994	0.953552	0.972056	0.985105	1.03393	1.02897	1.01116	0.903874	0.868933	0.850644	0.835585	0.83586	0.796125	0.778072	0.74271
	0.789697	0.641408	0.584307	0.530526	0.530404	0.589483	0.767528	0.925168	1.39021	1.48743	1.3076	1.22087	1.24551	1.33957	1.42833	1.37637	1.23009	1.17953	1.06504	1.0048	0.954213	0.944605	0.937405	0.964447	0.959516	0.927684	0.874379	0.845286	0.813695	0.801224	0.843724
	0.590899	0.633344	0.65205	0.735667	0.790418	0.931193	1.05714	1.18128	1.70967	1.84295	1.49843	1.097	1.0399	0.943743	0.917165	0.903979	0.92637	0.923068	0.941715	0.97402	1.00929	0.998668	1.01206	0.951568	0.924778	0.857838	0.870876	0.904596	0.966849	0.985357	0.986748
	1.29005	1.20838	1.18005	1.20211	1.30112	1.47	1.51125	1.56004	2.00774	2.22447	1.99023	1.47103	1.35817	1.17771	1.13726	1.08033	0.999767	0.973381	0.980861	0.955944	0.887438	0.792821	0.7554	0.707232	0.696449	0.684997	0.68331	0.670646	0.658982	0.66536	0.660085
	0.709289	0.727075	0.714041	0.705931	0.735305	0.817432	0.940337	1.04581	1.61958	1.88657	1.63102	1.50647	1.45597	1.27708	1.21195	1.19138	1.17097	1.13116	1.04376	1.02314	0.958748	0.922678	0.909238	0.890969	0.870414	0.823525	0.751474	0.75178	0.766135	0.754352	0.748848
	1.6316	1.32629	1.21996	1.08766	1.1111	1.18336	1.28697	1.33311	1.71261	1.83144	1.5633	1.30618	1.2571	1.16909	1.1132	1.07405	1.09549	1.06415	0.941511	0.884075	0.813067	0.783432	0.765016	0.736512	0.722128	0.728283	0.733342	0.738808	0.710857	0.671976	0.658289
	0.624568	0.656005	0.673009	0.73597	0.741496	0.763911	0.819839	0.921501	1.31092	1.43971	1.4429	1.38607	1.32438	1.08555	1.04338	1.05419	1.03625	0.980365	0.92666	0.90736	0.909823	0.945158	0.966928	0.955678	0.931788	0.954221	0.983609	0.971922	0.938511	0.926484	0.946737
	0.550916	0.64004	0.678233	0.698827	0.728552	0.813617	0.994732	1.10814	1.53177	1.66974	1.46327	1.2681	1.19978	1.09241	1.05699	1.00629	0.949921	0.931774	0.935999	0.972151	1.00581	0.985273	0.974439	0.980846	0.971654	0.957674	0.916101	0.920386	0.92582	0.899836	0.855479
	0.59402	0.622857	0.619803	0.653137	0.685587	0.809559	1.03434	1.24182	1.87606	2.11786	2.01574	1.63054	1.5352	1.42589	1.34148	1.20631	1.07095	1.02869	0.919162	0.888801	0.838275	0.791893	0.78072	0.752166	0.744309	0.728462	0.722149	0.725869	0.741095	0.747292	0.752538
	0.972383	1.02214	1.07876	1.06166	1.0206	0.923388	0.920751	0.992678	1.56906	1.8924	1.59067	1.2217	1.13186	1.02975	1.02295	0.99818	0.961227	0.975454	1.00029	1.01471	0.961213	0.929576	0.904091	0.858178	0.868643	0.862894	0.844479	0.83533	0.835462	0.838881	0.842386
	0.912996	0.887356	0.885497	0.846859	0.852779	0.896261	1.04769	1.15631	1.37596	1.43073	1.29156	1.13777	1.08757	1.04602	0.994919	0.982606	0.976667	0.986891	0.961028	0.973095	1.03638	1.00971	0.974096	0.97878	0.976124	0.935549	0.832651	0.823423	0.923364	0.948337	0.92403
	0.579456	0.582485	0.586479	0.622974	0.625498	0.673444	0.762509	0.866634	1.41109	1.68409	1.52919	1.21107	1.15222	1.11857	1.13899	1.14235	1.12355	1.11348	1.11376	1.13597	1.08364	1.01249	0.985968	0.924271	0.882636	0.893833	0.890128	0.863162	0.868213	0.876438	0.862343
	0.608774	0.596487	0.60834	0.643402	0.667357	0.684278	0.800467	0.972887	1.50379	1.63644	1.5502	1.31638	1.21397	1.04303	1.00641	0.915229	0.911905	0.903411	0.898929	0.90615	0.906412	0.906089	0.919237	0.936466	0.943378	0.977678	1.03012	1.02052	1.00173	0.993527	1.00458
	0.759901	0.726214	0.709348	0.689666	0.666479	0.69729	0.866472	1.02617	1.47523	1.52021	1.36379	1.19762	1.12085	0.999481	0.962592	0.940518	0.946521	1.00696	1.09786	1.10322	1.11217	1.08777	1.04291	0.99653	0.973767	0.898604	0.882378	0.892232	0.931449	0.923318	0.875631
	0.865606	0.822548	0.831146	0.802389	0.801334	0.776014	0.832813	0.940553	1.49857	1.71587	1.4967	1.2268	1.14685	1.00735	1.00679	1.00341	0.98123	0.979673	0.990976	0.973593	0.959716	0.982615	1.00379	0.977339	0.959445	0.928124	0.905076	0.905335	0.879719	0.858249	0.855427
	0.647296	0.697393	0.690563	0.749206	0.806597	0.890899	0.997331	1.15875	1.76244	1.70392	1.09387	0.874762	0.860019	0.866927	0.883055	0.921274	0.952859	0.925372	0.932542	0.95913	0.986446	1.02103	1.01526	1.04406	1.05269	1.07417	1.07189	1.04275	0.993983	0.98148	0.958534
	0.884615	0.832926	0.79941	0.784546	0.815215	0.842958	0.852487	0.931244	1.57691	1.80876	1.57837	1.23508	1.16273	1.09869	1.06025	1.00168	0.963883	0.951018	0.963763	0.965473	0.950413	0.931849	0.929064	0.914541	0.913468	0.912665	0.911679	0.909958	0.900288	0.886505	0.885518
	1.20417	1.27698	1.31659	1.36434	1.34275	1.30147	1.22937	1.25123	1.59268	1.59879	1.29081	1.13294	1.04484	0.962097	0.974183	0.952738	0.933707	0.924929	0.892892	0.871035	0.881273	0.894989	0.894803	0.878234	0.859746	0.859458	0.861711	0.862008	0.888173	0.88476	0.893801
	0.762764	0.675559	0.661439	0.695823	0.738883	0.789467	0.943163	1.18053	1.78786	1.76731	1.32961	1.17063	1.1314	1.01794	0.982791	0.96937	0.985711	0.97282	0.983065	1.00343	0.996059	0.970819	0.989159	1.0126	1.00796	0.987797	0.942166	0.893478	0.83487	0.849656	0.889089
	0.754448	0.728254	0.703918	0.658363	0.653677	0.703628	0.961948	1.25976	1.83952	1.76687	1.60509	1.53355	1.42976	1.22632	1.18006	1.09052	1.02808	0.995524	0.918356	0.902224	0.900306	0.93718	0.93641	0.846653	0.850482	0.827033	0.831733	0.862563	0.876306	0.850854	0.79316
siAKAP9+Pcnt	1.13916	1.10239	1.11363	0.961732	0.914323	0.872424	0.914616	1.00075	1.26192	1.31224	1.25123	1.25892	1.23421	1.15584	1.18322	1.12736	1.0811	1.07935	1.06829	1.02809	1.05136	0.99089	0.945305	0.863647	0.85948	0.863324	0.846153	0.807316	0.786202	0.804669	0.792006
	0.813733	0.817202	0.838055	0.820375	0.824718	0.868396	0.976545	1.15261	1.90847	2.08865	1.75354	1.46513	1.37842	1.21463	1.19339	1.10329	1.00259	0.973839	0.955033	0.945588	0.926439	0.908067	0.884102	0.843419	0.829276	0.79909	0.786204	0.780753	0.780115	0.77503	0.757896
	0.743953	0.774592	0.769987	0.792919	0.790699	0.798741	0.843389	0.885831	1.15653	1.28656	1.29682	1.18959	1.19359	1.17976	1.24191	1.30931	1.30793	1.29527	1.19761	1.14776	1.07308	0.983175	0.908762	0.839935	0.845941	0.867067	0.81421	0.805701	0.843356	0.856923	0.866168
	0.9001	0.809859	0.787001	0.709946	0.690009	0.716203	0.833612	0.956578	1.39565	1.46943	1.26778	1.1703	1.17689	1.10302	1.05591	1.00972	1.07828	1.06822	0.998782	0.996408	0.972773	0.944601	0.939799	0.937976	0.958389	0.979642	0.966291	0.982226	0.951867	0.931538	0.846275
	0.756828	0.774212	0.817661	0.866382	0.903564	0.98342	1.0875	1.13071	1.33581	1.43492	1.24331	1.0948	1.08651	1.02492	1.04625	1.03073	1.02805	1.03461	0.994835	0.992873	0.998177	0.959234	0.955495	0.934087	0.921238	0.939693	0.981098	0.970354	0.922901	0.915064	0.922621
	1.21071	1.20339	1.25701	1.32944	1.34948	1.30912	1.4992	1.79653	2.18235	2.18942	1.82222	1.47501	1.37188	1.15587	1.09823	1.00007	0.906798	0.894456	0.855865	0.833305	0.779845	0.760404	0.773297	0.760661	0.747622	0.727059	0.694908	0.679743	0.646772	0.639669	0.653203
	0.812356	0.796243	0.820792	0.803075	0.784862	0.831604	0.856218	0.915641	1.19518	1.26264	1.16264	1.06203	1.04362	1.11875	1.18351	1.1838	1.11856	1.07743	0.976455	0.984698	1.01091	0.978185	0.969993	0.959468	0.953316	0.948192	0.97953	0.973704	0.952587	0.948477	0.946583
	0.704164	0.688388	0.66113	0.645357	0.65265	0.687017	0.726241	0.809797	1.08156	1.21325	1.44483	1.42143	1.3319	1.20466	1.17495	1.14078	1.04026	1.03302	0.985165	0.972084	1.03177	1.11462	1.07238	0.973212	0.963947	0.968402	0.950559	0.921513	0.873272	0.88342	0.882046
	0.676163	0.757369	0.774653	0.756373	0.730002	0.689566	0.76451	0.820312	1.05477	1.19243	1.2281	1.19834	1.15086	1.06095	1.08146	1.07205	1.01681	0.988661	0.960318	0.963711	1.00521	1.03657	1.04526	1.00261	0.963138	0.968951	1.02297	1.03284	1.03269	0.998389	0.987918
	0.805922	0.726924	0.72118	0.722134	0.736166	0.740495	0.822296	0.894427	1.20863	1.35695	1.4207	1.15226	1.01482	1.02642	1.09609	1.21132	1.20037	1.12396	1.0572	1.06793	1.03528	1.01674	0.982381	0.96016	0.952675	0.977028	0.971547	0.913037	0.84892	0.846384	0.838715
	0.728827	0.684202	0.661742	0.67749	0.681157	0.690039	0.74992	0.795663	0.909915	0.963434	1.12439	1.25353	1.29881	1.32207	1.24799	1.03332	0.949845	0.950833	0.995887	1.01222	1.01743	1.07497	1.0559	1.03891	1.03245	1.04908	1.06421	1.04183	0.978674	0.957175	0.8912
	0.723593	0.698307	0.694918	0.662523	0.660698	0.673211	0.691384	0.719451	0.86448	0.923061	0.919006	0.971886	0.996553	1.02559	1.003	1.00517	0.988557	0.97906	0.987189	0.999253	1.06281	1.11884	1.14232	1.15228	1.14705	1.14224	1.09223	1.07194	1.0518	1.01946	0.962606
	0.852766	0.878313	0.881654	0.884247	0.921487	0.91989	0.915607	0.983432	1.10242	1.14011	1.17068	1.23481	1.26354	1.29367	1.22618	1.07459	1.00267	0.986789	0.970628	0.964332	0.959223	0.9578	0.955593	0.961011	0.964918	0.963745	0.947476	0.940985	0.919986	0.914519	0.907822
	0.87796	0.768075	0.739023	0.740305	0.769521	0.847998	1.03834	1.17778	1.79111	1.98496	1.86199	1.79578	1.70846	1.44241	1.34887	1.25825	1.09088	1.034	0.917926	0.880959	0.826547	0.783953	0.777967	0.756376	0.753439	0.751255	0.738559	0.735573	0.722718	0.722921	0.754606
	0.640936	0.611413	0.636845	0.668627	0.661472	0.755221	0.933079	1.024	1.34384	1.50973	1.65392	1.59126	1.60304	1.5096	1.42179	1.27571	1.23916	1.25874	1.25514	1.203	1.07882	1.0255	1.02249	0.990857	0.933533	0.7866	0.637345	0.605661	0.572868	0.541522	0.514052
	0.701119	0.680618	0.690102	0.781942	0.810361	0.842805	0.96023	1.14256	1.88582	1.97226	1.37548	1.21571	1.20222	1.12609	1.12119	1.08595	1.05792	1.03869	0.959156	0.931416	0.861013	0.835742	0.837868	0.84618	0.836182	0.85462	0.913046	0.92794	0.957987	0.96607	0.972651
	0.576279	0.683476	0.717689	0.674426	0.67445	0.716571	0.768634	0.820162	1.02695	1.10992	1.14105	1.15571	1.18826	1.40061	1.51277	1.61611	1.54114	1.48967	1.39586	1.29565	1.11092	0.977077	0.928391	0.817035	0.789893	0.764224	0.775779	0.779056	0.748451	0.731659	0.728222
	0.700711	0.800209	0.792173	0.742878	0.697781	0.69311	0.820254	0.911008	1.07617	1.11239	1.19513	1.16767	1.1302	1.05416	1.05447	1.10506	1.12866	1.1409	1.14239	1.13983	1.2181	1.2092	1.15008	1.02684	0.965967	0.912983	0.870114	0.856365	0.861755	0.875905	0.876186
	2.08432	1.90661	1.7934	1.62204	1.60362	1.48393	1.38343	1.40735	1.49447	1.4704	1.29305	1.24314	1.20364	1.13267	1.13317	1.1137	1.00303	0.959675	0.872025	0.82845	0.821881	0.806928	0.813493	0.804403	0.789404	0.786521	0.802981	0.78426	0.759393	0.760633	0.772041
	1.134	1.0105	0.965557	0.959127	1.00793	1.15912	1.29241	1.42242	1.81901	1.90535	1.75078	1.63693	1.56001	1.37123	1.24487	1.13361	0.99518	0.940334	0.842662	0.854855	0.872735	0.843544	0.827031	0.798743	0.786418	0.776947	0.773367	0.760704	0.748035	0.745542	0.733097
	1.01716	0.840761	0.821724	0.790319	0.733795	0.666899	0.701868	0.760074	0.95318	1.04029	1.16322	1.17186	1.16281	1.20562	1.20067	1.19797	1.2149	1.19972	1.22979	1.15559	1.02512	1.01403	1.03757	1.04604	1.06362	1.00673	0.913039	0.86098	0.818881	0.818342	0.764121
	0.59985	0.603488	0.608795	0.594112	0.586555	0.59837	0.658953	0.71704	1.07664	1.36353	1.47258	1.19809	1.15309	1.20587	1.25094	1.27462	1.31643	1.24328	1.11829	1.07256	1.0298	0.961149	0.944082	0.955082	0.951932	0.935458	0.930637	0.918994	0.901817	0.903733	0.911229
	0.60586	0.619219	0.636318	0.653188	0.638297	0.629878	0.665269	0.705108	0.887377	1.04767	1.13284	1.10657	1.09259	1.0795	1.08044	1.08353	1.0592	1.05468	1.0345	1.03511	1.04299	1.03073	1.03749	1.04246	1.03879	1.03699	1.04	1.03723	1.06065	1.08531	1.12154
	0.785961	0.82677	0.862639	0.823818	0.807507	0.838501	0.904654	1.0181	1.49059	1.73757	1.62299	1.37532	1.30737	1.14284	1.08118	0.976728	0.908829	0.907511	0.8866	0.891248	0.891863	0.898881	0.889189	0.913673	0.917209	0.912337	0.924947	0.927462	0.918358	0.917457	0.902844
	0.903343	0.810792	0.765557	0.70929	0.693282	0.699024	0.721198	0.765012	1.06941	1.16256	1.09098	1.11536	1.1214	1.1248	1.11132	1.02196	1.03323	1.07984	1.13182	1.10337	1.02069	0.971314	0.990199	1.02464	1.02894	1.0207	1.02389	0.997645	0.958136	0.98404	0.935324
	0.727456	0.73032	0.740071	0.754186	0.727636	0.722344	0.759514	0.819454	1.11818	1.16977	1.1713	1.17561	1.18684	1.28308	1.29872	1.2341	1.17858	1.17526	1.17856	1.15153	1.05954	0.994149	0.988639	0.96706	0.939449	0.949436	0.949205	0.921387	0.86065	0.832843	0.810227
	0.939455	0.892444	0.888126	0.857786	0.858319	0.845314	0.874627	0.882323	0.985162	1.05722	1.11177	1.15482	1.17973	1.27171	1.2382	1.09684	1.03276	1.00998	0.973855	0.971699	0.986158	0.986618	0.980294	0.964492	0.968445	0.941081	0.948811	0.973172	1.00119	0.992658	0.934075
	0.703637	0.675949	0.657901	0.660909	0.673293	0.744917	0.851039	0.96497	1.48862	1.56787	1.4575	1.30093	1.24679	1.22922	1.23989	1.14557	1.0234	1.00117	0.95553	0.944185	0.924238	0.927832	0.935597	0.931802	0.935649	0.933421	0.945166	0.910597	0.89958	0.889462	0.853511
	0.898426	0.886342	0.905999	0.895076	0.860862	0.815878	0.882816	0.961088	1.32185	1.37205	1.21269	1.11352	1.0936	1.04736	1.08268	1.12497	1.10408	1.11117	1.11929	1.14171	1.14843	1.05312	0.993335	0.930867	0.93048	0.921364	0.889592	0.87739	0.850542	0.830711	0.819982
	0.637552	0.675917	0.661612	0.692491	0.692859	0.703332	0.743834	0.7829	0.966079	1.02324	1.06771	1.10068	1.1391	1.14872	1.13797	1.12004	1.01549	0.978506	1.0119	1.03461	1.10023	1.18967	1.18538	1.07072	1.01882	1.01824	1.02485	0.987711	0.933367	0.910214	0.861536
	0.644511	0.639234	0.626802	0.625794	0.622977	0.650079	0.729051	0.818033	1.02352	1.08615	1.11652	1.08658	1.10732	1.16894	1.16751	1.16732	1.11448	1.07301	1.04244	1.07684	1.16401	1.10346	1.04868	0.996771	0.981743	0.98864	0.99009	0.98055	0.914719	0.902143	0.911479
	0.837203	0.890716	0.900927	0.854695	0.801056	0.757546	0.738179	0.769656	0.975638	1.09221	1.18939	1.26331	1.33016	1.34647	1.29904	1.22822	1.10919	1.07807	1.08787	1.07303	1.02641	0.982872	0.957909	0.91736	0.912223	0.897245	0.912853	0.917188	0.890824	0.882112	0.883343
	0.829452	0.902374	0.958977	1.05405	1.07215	0.93766	0.891723	0.913915	1.02478	1.09231	1.19798	1.21207	1.20388	1.1957	1.21671	1.23022	1.15596	1.12194	1.04297	1.02645	0.987176	0.969923	0.950733	0.935289	0.922016	0.900536	0.904818	0.879035	0.86201	0.86047	0.853583
	1.21308	1.25251	1.26147	1.11625	1.02229	0.910803	0.896751	0.906658	1.05879	1.13359	1.16487	1.11848	1.08336	1.02354	1.01554	1.04742	1.02991	1.0152	1.01599	1.00939	0.983567	0.968587	0.975652	0.95047	0.949525	0.953125	0.936489	0.93095	0.921958	0.925322	0.930558
	0.430302	0.3929	0.344147	0.35514	0.350304	0.275907	0.268596	0.33744	0.66267	1.57283	1.59936	1.17644	1.17429	1.15869	1.16591	1.13142	1.06903	1.05347	1.10097	1.02211	1.04428	1.11307	0.994453	1.0113	1.05841	1.06071	1.03923	0.993078	1.05673	1.0506	1.02397
	0.58797	0.52516	0.487657	0.469644	0.454335	0.448694	0.422069	0.467389	0.731555	1.43097	1.38116	1.26557	1.20261	1.20398	1.24286	1.16298	1.12242	1.10738	1.10585	1.12331	1.1706	1.16187	1.07005	1.07137	1.07205	1.03109	1.01758	0.993196	0.943984	0.919245	0.894831
	0.439971	0.419899	0.445878	0.458224	0.445983	0.415492	0.405652	0.464628	0.594868	0.948209	1.16976	1.16942	1.23761	1.17836	1.24481	1.22196	1.08129	1.15991	1.0837	1.09136	1.14153	1.11481	0.942056	0.914401	0.991649	0.983838	1.096	1.13515	1.08503	1.0981	1.09957
	0.640671	0.536874	0.489861	0.491297	0.409603	0.398815	0.341478	0.387599	0.49757	0.927991	1.0093	1.05225	1.02752	1.15387	1.17535	1.16159	1.19418	1.11525	1.02139	0.951482	1.03671	1.11193	1.06012	1.05103	1.03603	1.1279	1.11015	1.05737	1.09091	1.17722	1.13022
	0.56205	0.548279	0.491659	0.482355	0.490652	0.509217	0.515206	0.493146	0.601088	1.14019	1.28637	1.04963	0.975255	1.03988	0.991382	1.1279	1.17883	1.14176	1.03978	0.925727	0.994673	1.03967	1.03439	1.08416	1.03617	1.00015	1.05881	1.0432	1.09233	1.1399	1.08753
	0.393222	0.43138	0.396532	0.353614	0.282737	0.345692	0.481265	0.674415	0.960542	1.3795	1.31556	1.14977	1.26605	1.2563	1.12152	1.21901	1.20571	1.16032	1.09936	1.17029	1.13059	1.12427	1.07411	1.0133	0.922131	0.85033	0.901039	0.965269	0.987107	0.948754	1.03598

## Sheet: Figure 5D
siControl	siAKAP9	siAKAP9+Pcnt	siPcnt		Number of families	1
111	16	16	47		Number of comparisons per family	10
108	24	28	72		Alpha	0.05
73	39	28	43
105	74	44	92		Bonferroni's multiple comparisons test	Mean Diff,	95,00% CI of diff,	Significant?	Summary	Adjusted P Value
54	58	38	102		siControl vs. siAKAP6	76.86	66,57 to 87,15	Yes	****	<0,0001	A-B
65	47	10	76		siControl vs. siAKAP9	48.5	39,28 to 57,71	Yes	****	<0,0001	A-C
75	77	23	69		siControl vs. siAKAP9+Pcnt	67.63	58,02 to 77,24	Yes	****	<0,0001	A-D
112	69	36	107		siControl vs. siPcnt	11.33	-0,1753 to 22,84	No	ns	0.057	A-E
106	53	33	117		siAKAP6 vs. siAKAP9	-28.36	-38,51 to -18,22	Yes	****	<0,0001	B-C
96	18	29	89		siAKAP6 vs. siAKAP9+Pcnt	-9.232	-19,74 to 1,276	No	ns	0.1358	B-D
86	76	62	118		siAKAP6 vs. siPcnt	-65.53	-77,79 to -53,27	Yes	****	<0,0001	B-E
127	64	9	151		siAKAP9 vs. siAKAP9+Pcnt	19.13	9,673 to 28,59	Yes	****	<0,0001	C-D
146	81	40	62		siAKAP9 vs. siPcnt	-37.17	-48,55 to -25,79	Yes	****	<0,0001	C-E
110	63	22	91		siAKAP9+Pcnt vs. siPcnt	-56.3	-68,00 to -44,60	Yes	****	<0,0001	D-E
106	48	40	64
120	80	21	122		Test details	Mean 1	Mean 2	Mean Diff,	SE of diff,	n1	n2	t	DF
65	103	44	97		siControl vs. siAKAP6	99.39	22.53	76.86	3.649	127	90	21.06	526
54	47	39	140		siControl vs. siAKAP9	99.39	50.9	48.5	3.268	127	136	14.84	526
95	94	24	58		siControl vs. siAKAP9+Pcnt	99.39	31.77	67.63	3.409	127	115	19.84	526
154	37	35	90		siControl vs. siPcnt	99.39	88.06	11.33	4.082	127	63	2.776	526
108	72	39	100		siAKAP6 vs. siAKAP9	22.53	50.9	-28.36	3.599	90	136	7.881	526
96	29	59	117		siAKAP6 vs. siAKAP9+Pcnt	22.53	31.77	-9.232	3.728	90	115	2.477	526
134	84	30	105		siAKAP6 vs. siPcnt	22.53	88.06	-65.53	4.351	90	63	15.06	526
94	13	31	47		siAKAP9 vs. siAKAP9+Pcnt	50.9	31.77	19.13	3.355	136	115	5.702	526
93	49	23	96		siAKAP9 vs. siPcnt	50.9	88.06	-37.17	4.036	136	63	9.208	526
117	55	24	78		siAKAP9+Pcnt vs. siPcnt	31.77	88.06	-56.3	4.152	115	63	13.56	526
109	39	59	88
117	25	39	98
140	131	17	59
129	107	5	59
154	94	19	106
99	103	27	37
76	95	25	95
72	58	32	58
70	63	21	46
47	71	36	48
107	66	57	41
117	75	27	73
115	29	26	148
137	38	24	95
132	66	51	43
129	46	35	106
125	50	26	67
80	87	33	96
132	73	52	86
101	14	45	82
100	44	49	75
140	51	38	98
13	69	44	123
40	48	20	132
105	36	22	62
38	33	59	66
54	69	53	2
116	28	4	94
89	35	36	100
77	67	0	120
89	52	34	79
144	78	58	244
93	44	28	78
75	31	25	92
118	47	84	63
83	84	45	130
104	66	37	109
78	35	56
99	40	11
123	83	22
70	68	44
143	58	25
84	78	32
72	101	5
130	49	33
130	142	29
96	43	26
63	26	26
113	78	18
58	18	8
39	62	41
185	98	31
93	34	17
83	106	59
116	59	32
102	98	29
128	60	47
57	147	14
105	43	27
81	37	26
138	22	47
142	47	24
141	61	28
180	41	23
103	23	20
96	28	35
64	7	21
121	26	28
116	36	39
204	39	35
119	30	39
104	1	25
116	10	35
64	39	27
129	8	47
112	46	23
66	12	23
87	43	27
102	20	16
131	45	30
84	36	35
48	22	34
46	10	33
76	40	24
108	49	32
87	59	33
112	35	25
88	39	22
50	48	46
63	30
105	23
119	21
70	30
119	20
63	26
58	58
82	34
109	34
54	21
135	17
88	32
	34
	31
	69
	43
	40
	61
	35
	52
	44
