# Supplementary material for: AKAP6 orchestrates the nuclear envelope microtubule-organizing center by linking golgi and nucleus via AKAP9
Source: eLife. 2020 Dec 9;9:e61669. doi: 10.7554/eLife.61669 (PMC7725499; doi:10.7554/eLife.61669)
Supplement: Figure 6—source data 1. [file elife-61669-fig6-data1.xlsx]

## Sheet: Figure 6C
siControl		siAKAP6
AKAP6	Nesprin1	AKAP6	Nesprin1
1.39417	1.22286	0.187323	0.983126		Compare each cell mean with the other cell mean in that row
0.635624	1.03778	0.251235	0.800251
1.59845	0.616515	0.297598	1.09136		Number of families	1
0.489465	0.959457	0.200169	0.892939		Number of comparisons per family	2
1.19269	1.16084	0.331652	1.00516		Alpha	0.05
0.759253	0.789384	0.335232	0.83971
1.49045	1.0022	0.336047	0.786372		Bonferroni's multiple comparisons test	Predicted (LS) mean diff,	95,00% CI of diff,	Significant?	Summary	Adjusted P Value
1.29368	1.30525	0.359701	0.65596
1.14715	0.905716	0.357205	0.722835		shControl - shAKAP6
1.14132	1.50722	0.262609	0.700899		AKAP6	0.7365	0,5789 to 0,8941	Yes	****	<0,0001
0.840774	1.75791	0.345533	0.500417		Nesprin1	0.1362	-0,02133 to 0,2938	No	ns	0.1043
0.721142	1.11188	0.211812	0.658684
0.893183	1.53969	0.348008	0.64763
0.689196	1.14764	0.347372	0.901324		Test details	Predicted (LS) mean 1	Predicted (LS) mean 2	Predicted (LS) mean diff,	SE of diff,	N1	N2	t	DF
0.838547	1.66997	0.237116	0.638675
0.651393	1.99364	0.335301	1.01799		shControl - shAKAP6
0.982558	1.26354	0.271767	0.516883		AKAP6	1.071	0.3342	0.7365	0.06964	48	34	10.58	160
0.556738	1.05449	0.244255	0.600812		Nesprin1	0.9775	0.8413	0.1362	0.06964	48	34	1.956	160
0.459179	0.917251	0.364364	1.04289
0.858492	0.442467	0.346298	0.603624
1.08982	0.938185	0.343116	1.37014
0.442067	0.922817	0.34073	0.844838
0.620133	0.712011	0.330738	0.477056
0.399641	0.788372	0.265334	1.26206
0.464071	1.13016	0.435217	0.607456
0.988077	0.845782	0.454705	1.38004
1.31109	1.15529	0.400437	0.983126
0.941017	1.1196	0.360536	0.800251
1.45878	0.750702	0.633725	1.09136
1.42752	0.751357	0.378642	0.892939
1.29463	1.09412	0.392821	1.00516
1.05655	1.23392	0.359602	0.83971
1.22022	1.15531	0.347521	0.786372
0.966362	0.571231	0.348157	0.65596
1.6523	1.048
1.31293	0.540224
0.560536	1.10643
1.5562	0.725955
1.48009	0.428235
1.49552	0.737048
1.36745	0.926957
1.48177	0.370517
1.5925	1.2068
1.54869	0.5419
1.671	0.404528
1.30234	0.555805
1.44343	1.32419
0.614297	0.430431

## Sheet: Figure 6E
shControl				shAKAP6
Pcnt	AKAP9	AKAP6	GM130	Pcnt	AKAP9	AKAP6	GM130
0.457157	0.44417	1.39417	0.779172	0.44249	0.225797	0.187323	0.179188
0.660657	0.627947	0.635624	1.19683	0.504554	0.308433	0.251235	0.229055		Compare each cell mean with the other cell mean in that row
0.96546	1.01063	1.59845	1.16738	0.468971	0.139457	0.297598	0.315317
0.910282	0.997591	0.489465	0.130553	0.381911	0.152985	0.200169	0.177901		Number of families	1
0.578597	0.483954	1.19269	1.29172	0.425441	0.195967	0.331652	0.107686		Number of comparisons per family	4
0.577984	0.248153	0.759253	1.05082	0.537095	0.19804	0.335232	0.364957		Alpha	0.05
1.10737	1.0594	1.49045	1.93215	0.38342	0.182554	0.336047	0.109327
1.07813	1.06034	1.29368	1.37863	0.3821	0.121262	0.359701	0.141251		Bonferroni's multiple comparisons test	Predicted (LS) mean diff,	95,00% CI of diff,	Significant?	Summary	Adjusted P Value
1.12199	1.40209	1.14715	1.11826	0.437043	0.179469	0.357205	0.095092
0.703291	0.900562	1.14132	0.937149	0.395659	0.131347	0.262609	0.135039		shControl - shAKAP6
1.26621	1.36247	0.840774	0.86266	0.391957	0.133909	0.345533	0.090309		Pcnt	0.5601	0,4087 to 0,7115	Yes	****	<0,0001
0.790115	0.911854	0.721142	0.715707	0.495735	0.136128	0.211812	0.10112		AKAP9	0.8257	0,6743 to 0,9771	Yes	****	<0,0001
1.05721	1.15324	0.893183	0.715084	0.564071	0.305937	0.348008	0.136199		AKAP6	0.6219	0,4879 to 0,7558	Yes	****	<0,0001
0.582842	0.247876	0.689196	0.688524	0.476493	0.143194	0.347372	0.094342		GM130	0.7769	0,6425 to 0,9112	Yes	****	<0,0001
0.590458	0.35406	0.838547	1.10161	0.44348	0.2405	0.237116	0.117818
0.934499	0.960826	0.651393	0.384895	0.722179	0.122845	0.335301	0.0882
0.775236	0.588032	0.982558	0.862575	0.397899	0.116366	0.271767	0.115596		Test details	Predicted (LS) mean 1	Predicted (LS) mean 2	Predicted (LS) mean diff,	SE of diff,	N1	N2	t	DF
1.10112	1.15661	0.556738	0.631072	0.362717	0.114898	0.244255	0.114535
0.514929	0.181264	0.459179	0.128827	0.559096	0.350062	0.364364	0.239498		shControl - shAKAP6
1.19539	1.0135	0.858492	1.46665	0.565463	0.375012	0.346298	0.242272		Pcnt	1	0.4399	0.5601	0.0604	77	39	9.273	493
1.15943	1.30398	1.08982	0.986166	0.504059	0.122355	0.343116	0.113954		AKAP9	1	0.1743	0.8257	0.0604	77	39	13.67	493
1.25934	1.06278	0.442067	0.108874	0.379223	0.18678	0.34073	0.169651		AKAP6	1	0.3781	0.6219	0.05343	58	77	11.64	493
0.998001	1.24441	0.620133	0.452832	0.309637	0.102349	0.330738	0.271026		GM130	1	0.2231	0.7769	0.05358	58	76	14.5	493
0.441452	0.25176	0.399641	0.126747	0.421951	0.214815	0.265334	0.341764
0.923817	1.23884	0.464071	0.313166	0.332227	0.10855	0.522733	0.178439
0.96256	1.38421	0.988077	1.32838	0.727438	0.344432	0.590285	0.104332
0.627692	0.55972	1.31109	1.6241	0.465316	0.142574	0.435217	0.095828
0.717534	0.904984	0.941017	1.30394	0.505662	0.223039	0.454705	0.156038
0.856612	0.758967	1.45878	1.75307	0.365358	0.126386	0.400437	0.104459
0.696901	0.414372	1.42752	2.02854	0.450012	0.175896	0.360536	0.214423
1.07917	1.19968	1.29463	1.94598	0.433812	0.231819	0.633725	0.348415
1.17165	1.27701	1.05655	1.15248	0.389551	0.120511	0.378642	0.131331
0.867035	0.900904	1.22022	0.704613	0.342768	0.108436	0.392821	0.109115
1.01154	1.04733	0.966362	1.34157	0.368588	0.115697	0.359602	0.106073
1.34523	1.56474	1.6523	0.465412	0.340103	0.114979	0.347521	0.109299
1.04953	1.04761	1.31293	0.207843	0.4199	0.133174	0.348157	0.51225
1.02705	0.789319	0.560536	0.596998	0.337957	0.108892	0.330211	0.139482
1.11581	1.0831	1.5562	1.87728	0.403322	0.124215	0.35112	0.20016
1.50685	1.30149	1.48009	1.855	0.322276	0.118977	0.37908	0.179019
1.08629	0.772626	1.49552	1.94245			0.30952	0.093238
1.47343	1.21564	1.36745	0.283407			0.325915	0.12185
0.910565	0.837932	1.48177	1.49409			0.300104	0.120138
0.801646	0.699797	1.5925	1.93197			0.493501	0.154595
0.865856	0.725139	1.54869	1.71397			0.418105	0.329878
0.767171	0.842534	1.671	1.76583			0.439224	0.231984
0.99694	1.18202	1.30234	1.50079			0.497578	0.321076
1.27071	1.21967	1.44343	1.33762			0.336783	0.560574
0.754178	0.869704	0.614297	0.650529			0.372776	0.159307
1.18879	1.08312	0.722594	0.680769			0.436092	0.1256
0.639058	0.752603	0.91788	1.01133			0.519999	0.549254
1.20145	1.08746	0.542162	0.333713			0.498184	0.133638
0.828764	0.714842	0.868942	0.70515			0.497896	0.18066
1.33537	1.25896	0.766501	0.89515			0.449087	0.129067
0.678838	0.850595	0.82763	0.750772			0.319453	0.419154
0.937729	0.848882	0.713784	1.39135			0.470991	0.19791
0.97909	1.16456	0.366094	0.152359			0.47979	0.216871
0.63328	0.587722	0.524036	0.619681			0.464468	0.615648
1.27191	1.49173	0.357911	0.125798			0.467431	0.953196
0.805395	0.796597					0.460929	0.7628
0.852297	0.742714					0.485	0.20623
1.36119	0.915216					0.490469	0.098205
1.43523	1.71901					0.459149	0.13968
1.47306	1.82333					0.275505	0.306374
1.57025	1.7896					0.350255	0.509491
1.00868	0.812312					0.3078	0.290596
1.09506	1.53567					0.390673	0.278455
0.971285	0.785713					0.445915	0.158189
1.35805	1.52857					0.439432	0.1481
1.23605	1.46351					0.500929	0.237729
1.28278	1.07386					0.348963	0.134671
1.29564	1.50524					0.301267	0.215329
0.995125	0.84565					0.324165	0.210843
1.28854	1.26037					0.259617	0.482789
1.19962	1.01512					0.390434	0.12935
1.28	1.38089					0.414506	0.10712
1.29031	1.44122					0.416872	0.149571
0.794242	0.860109					0.421496
