# Supplementary material for: AKAP6 orchestrates the nuclear envelope microtubule-organizing center by linking golgi and nucleus via AKAP9
Source: eLife. 2020 Dec 9;9:e61669. doi: 10.7554/eLife.61669 (PMC7725499; doi:10.7554/eLife.61669)
Supplement: Figure 8—source data 1. [file elife-61669-fig8-data1.xlsx]

## Sheet: Figure 8C
Endogenous Pcnt	non						little						half moon						full NE
recruitment	#1	#2	#3	#4	Mean	SD	#1	#2	#3	#4	Mean	SD	#1	#2	#3	#4	Mean	SD	#1	#2	#3	#4	Mean	SD
30h	0.64	0.58	0.48	0.43	0.5325	0.095	0.28	0.33	0.52	0.43	0.39	0.106771	0.08	0.08	0	0.13	0.0725	0.0537742	0	0	0	0.02	0.005	0.01
48h	0.36	0.39	0.34	0.28	0.3425	0.0464579	0.28	0.41	0.34	0.54	0.3925	0.111766	0.21	0.14	0.2	0.14	0.1725	0.0377492	0.15	0.06	0.12	0.04	0.0925	0.0512348
72h	0.1	0.04	0.14	0.13	0.1025	0.045	0.35	0.46	0.37	0.38	0.39	0.0483046	0.22	0.15	0.25	0.25	0.2175	0.0471699	0.33	0.35	0.24	0.23	0.2875	0.0613052
Endogenous Pcnt
Within each column, compare rows (simple effects within columns)
Number of families	4
Number of comparisons per family	3
Alpha	0.05
Bonferroni's multiple comparisons test	Mean Diff,	95,00% CI of diff,	Significant?	Summary			Adjusted P Value
non
24h vs. 48h	0.19	0,07277 to 0,3072	Yes	**			0.001
24h vs. 72h	0.43	0,3128 to 0,5472	Yes	****			<0,0001
48h vs. 72h	0.24	0,1228 to 0,3572	Yes	****			<0,0001
little
24h vs. 48h	-0.0025	-0,1197 to 0,1147	No	ns			>0,9999
24h vs. 72h	0	-0,1172 to 0,1172	No	ns			>0,9999
48h vs. 72h	0.0025	-0,1147 to 0,1197	No	ns			>0,9999
half moon
24h vs. 48h	-0.1	-0,2172 to 0,01723	No	ns			0.1142
24h vs. 72h	-0.145	-0,2622 to -0,02777	Yes	*			0.012
48h vs. 72h	-0.045	-0,1622 to 0,07223	No	ns			0.9992
full NE
24h vs. 48h	-0.0875	-0,2047 to 0,02973	No	ns			0.2001
24h vs. 72h	-0.2825	-0,3997 to -0,1653	Yes	****			<0,0001
48h vs. 72h	-0.195	-0,3122 to -0,07777	Yes	***			0.0008
Test details	Mean 1	Mean 2	Mean Diff,	SE of diff,			N1	N2	t	DF
non
24h vs. 48h	0.5325	0.3425	0.19	0.04555			4	4	4.171	24
24h vs. 72h	0.5325	0.1025	0.43	0.04555			4	4	9.44	24
48h vs. 72h	0.3425	0.1025	0.24	0.04555			4	4	5.269	24
little
24h vs. 48h	0.39	0.3925	-0.0025	0.04555			4	4	0.05488	24
24h vs. 72h	0.39	0.39	0	0.04555			4	4	0	24
48h vs. 72h	0.3925	0.39	0.0025	0.04555			4	4	0.05488	24
half moon
24h vs. 48h	0.0725	0.1725	-0.1	0.04555			4	4	2.195	24
24h vs. 72h	0.0725	0.2175	-0.145	0.04555			4	4	3.183	24
48h vs. 72h	0.1725	0.2175	-0.045	0.04555			4	4	0.9879	24
full NE
24h vs. 48h	0.005	0.0925	-0.0875	0.04555			4	4	1.921	24
24h vs. 72h	0.005	0.2875	-0.2825	0.04555			4	4	6.202	24
48h vs. 72h	0.0925	0.2875	-0.195	0.04555			4	4	4.281	24

## Sheet: Figure 8D
Endogenous AKAP9	non						little						half moon						full NE
recruitment	#1	#2	#3	#4	Mean	SD	#1	#2	#3	#4	Mean	SD	#1	#2	#3	#4	Mean	SD	#1	#2	#3	#4	Mean	SD
30h	0.68	0.452381	0.404255	0.442857	0.494873	0.12516	0.16	0.428571	0.531915	0.428571	0.387264	0.159149	0.14	0.119048	0.042553	0.128571	0.107543	0.0441652	0.02	0	0.021277	0	0.0103193	0.011927
48h	0.182	0.367647	0.269231	0.26087	0.269937	0.0760764	0.227	0.426471	0.519231	0.391304	0.391002	0.121925	0.295	0.132353	0.153846	0.217391	0.199648	0.0731055	0.295	0.073529	0.057692	0.130435	0.139164	0.108485
72h	0.21	0.172414	0.346154	0.245283	0.243463	0.0746469	0.21	0.344828	0.384615	0.433962	0.343351	0.0960863	0.26	0.275862	0.153846	0.188679	0.219597	0.0579577	0.32	0.206897	0.115385	0.132075	0.193589	0.0931964
Endogenous AKAP9
Within each column, compare rows (simple effects within columns)
Number of families	4
Number of comparisons per family	3
Alpha	0.05
Bonferroni's multiple comparisons test	Mean Diff,	95,00% CI of diff,	Significant?	Summary	Adjusted P Value
non
24h vs. 48h	0.2249	0,09159 to 0,3583	Yes	***	0.0007
24h vs. 72h	0.2514	0,1181 to 0,3848	Yes	***	0.0002
48h vs. 72h	0.02647	-0,1069 to 0,1598	No	ns	>0,9999
little
24h vs. 48h	-0.003737	-0,1371 to 0,1296	No	ns	>0,9999
24h vs. 72h	0.04391	-0,08943 to 0,1773	No	ns	>0,9999
48h vs. 72h	0.04765	-0,08570 to 0,1810	No	ns	>0,9999
half moon
24h vs. 48h	-0.0921	-0,2255 to 0,04124	No	ns	0.2644
24h vs. 72h	-0.1121	-0,2454 to 0,02129	No	ns	0.1223
48h vs. 72h	-0.01995	-0,1533 to 0,1134	No	ns	>0,9999
full NE
24h vs. 48h	-0.1288	-0,2622 to 0,004502	No	ns	0.0607
24h vs. 72h	-0.1833	-0,3166 to -0,04992	Yes	**	0.005
48h vs. 72h	-0.05443	-0,1878 to 0,07892	No	ns	0.912
Test details	Mean 1	Mean 2	Mean Diff,	SE of diff,	N1	N2	t	DF
non
24h vs. 48h	0.4949	0.2699	0.2249	0.05181	4	4	4.341	24
24h vs. 72h	0.4949	0.2435	0.2514	0.05181	4	4	4.852	24
48h vs. 72h	0.2699	0.2435	0.02647	0.05181	4	4	0.511	24
little
24h vs. 48h	0.3873	0.391	-0.003737	0.05181	4	4	0.07213	24
24h vs. 72h	0.3873	0.3434	0.04391	0.05181	4	4	0.8475	24
48h vs. 72h	0.391	0.3434	0.04765	0.05181	4	4	0.9197	24
half moon
24h vs. 48h	0.1075	0.1996	-0.0921	0.05181	4	4	1.778	24
24h vs. 72h	0.1075	0.2196	-0.1121	0.05181	4	4	2.163	24
48h vs. 72h	0.1996	0.2196	-0.01995	0.05181	4	4	0.385	24
full NE
24h vs. 48h	0.01032	0.1392	-0.1288	0.05181	4	4	2.487	24
24h vs. 72h	0.01032	0.1936	-0.1833	0.05181	4	4	3.537	24
48h vs. 72h	0.1392	0.1936	-0.05443	0.05181	4	4	1.05	24

## Sheet: Figure 8F
Endogenous GM130	non					little					half moon					full NE
recruitment	#1	#2	#3	Mean	SD	#1	#2	#3	Mean	SD	#1	#2	#3	Mean	SD	#1	#2	#3	Mean	SD
48h	0.708333	0.591837	0.745763	0.681978	0.0802762	0.208333	0.346939	0.118644	0.224639	0.115017	0.0694444	0.0204082	0.135593	0.0751486	0.057804	0.0138889	0.0408163	0	0.0182351	0.0207523
72h	0.304348	0.5	0.555556	0.453301	0.131954	0.347826	0.26	0.365079	0.324302	0.0563512	0.217391	0.18	0.0634921	0.153628	0.0802675	0.130435	0.06	0.015873	0.0687693	0.0577821
Endogenous GM130
Compare each cell mean with the other cell mean in that column
Number of families	1
Number of comparisons per family	4
Alpha	0.05
Bonferroni's multiple comparisons test	Mean Diff,	95,00% CI of diff,	Significant?	Summary	Adjusted P Value
48h - 72h
non	0.2287	-0,02436 to 0,4817	No	ns	0.0799
little	-0.09966	-0,3527 to 0,1534	No	ns	0.969
half moon	-0.07848	-0,3315 to 0,1746	No	ns	>0,9999
full NE	-0.05053	-0,3036 to 0,2025	No	ns	>0,9999
Test details	Mean 1	Mean 2	Mean Diff,	SE of diff,	N1	N2	t	DF
48h - 72h
non	0.682	0.4533	0.2287	0.07893	3	3	2.897	8
little	0.2246	0.3243	-0.09966	0.07893	3	3	1.263	8
half moon	0.07515	0.1536	-0.07848	0.07893	3	3	0.9943	8
full NE	0.01824	0.06877	-0.05053	0.07893	3	3	0.6403	8
