# Supplementary material for: AKAP6 orchestrates the nuclear envelope microtubule-organizing center by linking golgi and nucleus via AKAP9
Source: eLife. 2020 Dec 9;9:e61669. doi: 10.7554/eLife.61669 (PMC7725499; doi:10.7554/eLife.61669)
Supplement: Figure 9—source data 1. [file elife-61669-fig9-data1.xlsx]

## Sheet: Figure 9B
Endogenous GM130	non					non					non
recruitment	#1	#2	#3	Mean	SD	#1	#2	#3	Mean	SD	#1	#2	#3	Mean	SD
48h	30.2885	23.5294	17.3438	23.7205	6.47447	16.6667	4.34783	9.18367	10.0661	6.20664	5.40541	1.69491	5.81395	4.30476	2.2694
72h	58.2857	50.8749	42.1429	50.4345	8.08043	34.5622	19.883	27.9661	27.4704	7.35213	12.1053	3.26087	4.28571	6.55061	4.83768
Compare cell means regardless of rows and columns
Number of families	1
Number of comparisons per family	15
Alpha	0.05
Bonferroni's multiple comparisons test	Mean Diff,	95,00% CI of diff,	Significant?	Summary	Adjusted P Value
non:siControl vs. non:siAkap6	13.65	-4,725 to 32,03	No	ns	0.2839
non:siControl vs. non:siAkap9	19.42	1,036 to 37,80	Yes	*	0.0344
non:siControl vs. ET-1:siControl	-26.71	-45,09 to -8,335	Yes	**	0.0028
non:siControl vs. ET-1:siAkap6	-3.75	-22,13 to 14,63	No	ns	>0,9999
non:siControl vs. ET-1:siAkap9	17.17	-1,210 to 35,55	No	ns	0.0778
non:siAkap6 vs. non:siAkap9	5.761	-12,62 to 24,14	No	ns	>0,9999
non:siAkap6 vs. ET-1:siControl	-40.37	-58,75 to -21,99	Yes	****	<0,0001
non:siAkap6 vs. ET-1:siAkap6	-17.4	-35,78 to 0,9750	No	ns	0.0714
non:siAkap6 vs. ET-1:siAkap9	3.515	-14,86 to 21,89	No	ns	>0,9999
non:siAkap9 vs. ET-1:siControl	-46.13	-64,51 to -27,75	Yes	****	<0,0001
non:siAkap9 vs. ET-1:siAkap6	-23.17	-41,55 to -4,786	Yes	**	0.0092
non:siAkap9 vs. ET-1:siAkap9	-2.246	-20,63 to 16,13	No	ns	>0,9999
ET-1:siControl vs. ET-1:siAkap6	22.96	4,585 to 41,34	Yes	**	0.0098
ET-1:siControl vs. ET-1:siAkap9	43.88	25,50 to 62,26	Yes	****	<0,0001
ET-1:siAkap6 vs. ET-1:siAkap9	20.92	2,540 to 39,30	Yes	*	0.0201
Test details	Mean 1	Mean 2	Mean Diff,	SE of diff,	N1	N2	t	DF
non:siControl vs. non:siAkap6	23.72	10.07	13.65	5.037	3	3	2.711	12
non:siControl vs. non:siAkap9	23.72	4.305	19.42	5.037	3	3	3.855	12
non:siControl vs. ET-1:siControl	23.72	50.43	-26.71	5.037	3	3	5.304	12
non:siControl vs. ET-1:siAkap6	23.72	27.47	-3.75	5.037	3	3	0.7445	12
non:siControl vs. ET-1:siAkap9	23.72	6.551	17.17	5.037	3	3	3.409	12
non:siAkap6 vs. non:siAkap9	10.07	4.305	5.761	5.037	3	3	1.144	12
non:siAkap6 vs. ET-1:siControl	10.07	50.43	-40.37	5.037	3	3	8.014	12
non:siAkap6 vs. ET-1:siAkap6	10.07	27.47	-17.4	5.037	3	3	3.455	12
non:siAkap6 vs. ET-1:siAkap9	10.07	6.551	3.515	5.037	3	3	0.6979	12
non:siAkap9 vs. ET-1:siControl	4.305	50.43	-46.13	5.037	3	3	9.158	12
non:siAkap9 vs. ET-1:siAkap6	4.305	27.47	-23.17	5.037	3	3	4.599	12
non:siAkap9 vs. ET-1:siAkap9	4.305	6.551	-2.246	5.037	3	3	0.4459	12
ET-1:siControl vs. ET-1:siAkap6	50.43	27.47	22.96	5.037	3	3	4.559	12
ET-1:siControl vs. ET-1:siAkap9	50.43	6.551	43.88	5.037	3	3	8.712	12
ET-1:siAkap6 vs. ET-1:siAkap9	27.47	6.551	20.92	5.037	3	3	4.153	12

## Sheet: Figure 9D
	siControl					siAKAP6					siAKAP9
time	#1	#2	#3	Mean	SD	#1	#2	#3	Mean	SD	#1	#2	#3	Mean	SD
0	1	1	1	1	0	1	1	1	1	0	1	1	1	1	0
10	0.8	0.89	0.85	0.846667	0.0450925	1.07	1.08	1.04	1.06333	0.0208167	0.96	1.06	1.01	1.01	0.05
20	0.71	0.81	0.83	0.783333	0.064291	1	0.9	1.08	0.993333	0.090185	0.96	0.95	0.95	0.953333	0.0057735
30	0.72	0.72	0.58	0.673333	0.0808291	0.97	0.91	1.06	0.98	0.0754983	0.99	0.88	0.96	0.943333	0.0568624
40	0.43	0.58	0.44	0.483333	0.083865	1.05	0.89	0.86	0.933333	0.102144	0.91	0.91	0.97	0.93	0.034641
Within each row, compare columns (simple effects within rows)
Number of families	5
Number of comparisons per family	2
Alpha	0.05
Bonferroni's multiple comparisons test	Mean Diff,	95,00% CI of diff,	Significant?	Summary	Adjusted P Value
0
siControl vs. siAKAP6	0	-0,1402 to 0,1402	No	ns	>0,9999
siControl vs. siAKAP9	0	-0,1402 to 0,1402	No	ns	>0,9999
10
siControl vs. siAKAP6	-0.3733	-0,5136 to -0,2331	Yes	****	<0,0001
siControl vs. siAKAP9	-0.32	-0,4602 to -0,1798	Yes	****	<0,0001
20
siControl vs. siAKAP6	-0.21	-0,3502 to -0,06977	Yes	**	0.0027
siControl vs. siAKAP9	-0.17	-0,3102 to -0,02977	Yes	*	0.0153
30
siControl vs. siAKAP6	-0.3067	-0,4469 to -0,1664	Yes	****	<0,0001
siControl vs. siAKAP9	-0.27	-0,4102 to -0,1298	Yes	***	0.0002
40
siControl vs. siAKAP6	-0.45	-0,5902 to -0,3098	Yes	****	<0,0001
siControl vs. siAKAP9	-0.4467	-0,5869 to -0,3064	Yes	****	<0,0001
Test details	Mean 1	Mean 2	Mean Diff,	SE of diff,	N1	N2	t	DF
0
siControl vs. siAKAP6	1	1	0	0.05943	3	3	0	30
siControl vs. siAKAP9	1	1	0	0.05943	3	3	0	30
10
siControl vs. siAKAP6	0.69	1.063	-0.3733	0.05943	3	3	6.282	30
siControl vs. siAKAP9	0.69	1.01	-0.32	0.05943	3	3	5.385	30
20
siControl vs. siAKAP6	0.7833	0.9933	-0.21	0.05943	3	3	3.534	30
siControl vs. siAKAP9	0.7833	0.9533	-0.17	0.05943	3	3	2.861	30
30
siControl vs. siAKAP6	0.6733	0.98	-0.3067	0.05943	3	3	5.16	30
siControl vs. siAKAP9	0.6733	0.9433	-0.27	0.05943	3	3	4.543	30
40
siControl vs. siAKAP6	0.4833	0.9333	-0.45	0.05943	3	3	7.572	30
siControl vs. siAKAP9	0.4833	0.93	-0.4467	0.05943	3	3	7.516	30

## Sheet: Figure 9E
Resorption Assay	PBS	control virus	shAKAP6	Ad-SR1
hOC20-03-03 #1	100	110.012	36.0879	57.8544
hOC20-03-03 #2	100	106.331	63.6091	40.391
hOC20-02-28 #2	100	129.357	46.0646	49.1453
hOC20-04-21 #2	100	137.193	39.9498	43.585
Mean	100	120.7	46.43	47.74
Std. Deviation	0	14.92	12.17	7.65
Number of families	1
Number of comparisons per family	2
Alpha	0.05
Bonferroni's multiple comparisons test	Mean Diff,	95,00% CI of diff,	Significant?	Summary	Adjusted P Value
control virus vs. shAKAP6	74.3	26,00 to 122,6	Yes	*	0.0153	B-C
control virus vs. Ad-SR1	72.98	35,61 to 110,4	Yes	**	0.0077	B-D
Test details	Mean 1	Mean 2	Mean Diff,	SE of diff,	n1	n2	t	DF
control virus vs. shAKAP6	120.7	46.43	74.3	11.56	4	4	6.425	3
control virus vs. Ad-SR1	120.7	47.74	72.98	8.949	4	4	8.156	3

## Sheet: Figure 9G
	PBS	control virus	Ad-SR1	Ad-shAKAP6
hOC20-03-03 #1	100	122.222	101.424	113.105
hOC20-03-03 #2	100	97.5676	94.0541	98.3784
hOC20-02-28 #1	100	101.657	104.144	117.68
hOC20-02-28 #2	100	86.4865	51.0811	62.4324
Mean	100	102	87.68	97.9
Std. Deviation	0	14.94	24.77	25.04
Number of families	1
Number of comparisons per family	2
Alpha	0.05
Bonferroni's multiple comparisons test	Mean Diff,	95,00% CI of diff,	Significant?	Summary	Adjusted P Value
control virus vs. Ad-SR1	14.31	-21,58 to 50,19	No	ns	0.3889	B-C
control virus vs. Ad-shAKAP6	4.084	-31,11 to 39,28	No	ns	>0,9999	B-D
Test details	Mean 1	Mean 2	Mean Diff,	SE of diff,	n1	n2	t	DF
control virus vs. Ad-SR1	102	87.68	14.31	8.592	4	4	1.665	3
control virus vs. Ad-shAKAP6	102	97.9	4.084	8.428	4	4	0.4846	3
